# Supplementary material for: Metal complexes of pyridine-fused macrocyclic polyamines targeting the chemokine receptor CXCR4
Source: Royal Society of Chemistry journal article supplement (doi:10.1039/c5ob01557j), 2015-01-01

# Metal complexes of pyridine-fused macrocyclic polyamines targeting the HIV coreceptor CXCR4

Sunil Hamal, Thomas D'huys, William F. Rowley, Kurt Vermeire, Stefano Aquaro, Brian J. Frost, Dominique Schols,\* and Thomas W. Bell\*

| Table of Contents                                                                                                                         | Page             |
|-------------------------------------------------------------------------------------------------------------------------------------------|------------------|
| Synthesis of compound <b>2</b> .....                                                                                                      | S-2              |
| Synthesis of compound <b>4</b> .....                                                                                                      | S-2              |
| Synthesis of compound <b>5</b> .....                                                                                                      | S-3              |
| Synthesis of compound <b>10</b> .....                                                                                                     | S-4              |
| Synthesis of compound <b>11</b> .....                                                                                                     | S-4              |
| Synthesis of compound <b>12</b> .....                                                                                                     | S-5              |
| Synthesis of compound <b>13</b> .....                                                                                                     | S-6              |
| Synthesis of compound <b>14</b> .....                                                                                                     | S-7              |
| Synthesis of compound <b>15</b> .....                                                                                                     | S-7              |
| Synthesis of compound <b>16</b> .....                                                                                                     | S-8              |
| Synthesis of compound <b>17</b> .....                                                                                                     | S-9              |
| Synthesis of compound <b>18</b> .....                                                                                                     | S-10             |
| Synthesis of compound <b>19</b> .....                                                                                                     | S-11             |
| Synthesis of compound <b>20</b> .....                                                                                                     | S-11             |
| Synthesis of compound <b>21</b> .....                                                                                                     | S-12             |
| Table 1. Crystallographic data for <b>2</b> , <b>4</b> , and <b>17</b> .....                                                              | S-13             |
| Figure 1. Numbered thermal ellipsoid plot for <b>2</b> .....                                                                              | S-14             |
| Table 2. Crystal data and structure refinement for <b>2</b> .....                                                                         | S-14             |
| Table 3. Atomic coordinates and equivalent isotropic displacement parameters for <b>2</b> .....                                           | S-15             |
| Table 4. Bond lengths and angles for <b>2</b> .....                                                                                       | S-15             |
| Table 5. Torsion angles for <b>2</b> .....                                                                                                | S-17             |
| Figure 2. Numbered thermal ellipsoid for <b>4</b> .....                                                                                   | S-18             |
| Table 6. Crystal data and structure refinement for <b>4</b> .....                                                                         | S-18             |
| Table 7. Atomic coordinates and equivalent isotropic displacement parameters for <b>4</b> .....                                           | S-19             |
| Table 8. Bond lengths and angles for <b>4</b> .....                                                                                       | S-20             |
| Table 9. Anisotropic displacement parameters for <b>4</b> .....                                                                           | S-23             |
| Table 10. Hydrogen coordinates and isotropic displacement parameters for <b>4</b> .....                                                   | S-24             |
| Table 11. Torsion angles for <b>4</b> .....                                                                                               | S-26             |
| Figure 3. Numbered thermal ellipsoid for <b>17</b> .....                                                                                  | S-28             |
| Table 12. Crystal data and structure refinement for <b>17</b> .....                                                                       | S-28             |
| Table 13. Atomic coordinates and equivalent isotropic displacement parameters for <b>17</b> .....                                         | S-28             |
| Table 14. Bond lengths and angles for <b>17</b> .....                                                                                     | S-31             |
| Table 15. Anisotropic displacement parameters for <b>17</b> .....                                                                         | S-43             |
| Table 16. Hydrogen coordinates and isotropic displacement parameters for <b>17</b> .....                                                  | S-45             |
| Table 17. Torsion angles for <b>17</b> .....                                                                                              | S-47             |
| <sup>1</sup> H and <sup>13</sup> C NMR spectra of compounds <b>6</b> , <b>8</b> , <b>12</b> , <b>15</b> , <b>18</b> , and <b>21</b> ..... | Subsequent pages |

**Synthesis of 3,6,9,12,18-pentaazabicyclo[12,3,1]octadeca-1(18),2,12,14,16-pentaene diiodomanganese(II) (2)**<sup>37</sup>

A mixture of 0.27 g (2 mmol) of pyridine-2,6-dicarboxaldehyde<sup>38</sup> and 0.49 g (2 mmol) of Mn(OAc)<sub>2</sub>•4H<sub>2</sub>O, 30 mL of methanol and two drops of glacial acetic acid were boiled under reflux for 0.5 h. The reaction mixture was allowed to cool to 45-50 °C and a solution of 0.45 g (2 mmol) of triethylenetetramine hydrate in 15 mL of methanol was added. The color of the solution changed to reddish orange, then dark red upon boiling under reflux for 6 h. The solution was concentrated by rotary evaporation to ca. 20 mL and 2.5 mL of 1.6 M aq. KI solution was added dropwise. The solvent was evaporated further to a volume of ca. 5 mL. The resulting dark precipitate was collected by filtration, washed with 1 mL of cold methanol, then dried overnight in air. A solution of the crude product in 10 mL of methanol was allowed to evaporate slowly at room temperature to yield 0.57 g (53%) of rectangular dark red crystals, mp 270 °C (d). The structure was determined by X-ray crystallography. IR (neat, cm<sup>-1</sup>) 3385 (s), 3256 (m), 3207 (m), 2913 (w), 2864 (w), 1649 (m), 1589 (m), 1461 (m), 1423 (w), 1334 (w), 1277 (m), 1180 (w), 1154 (w), 1109 (w), 1096 (m), 1041 (m), 1014 (w), 941 (m), 914 (s), 824 (s), 808 (s), 663 (w), 640 (s).

**Synthesis of 1,2-bis(2-(6-(1-((2-aminoethylamino)ethyl)imidazolidin-2-yl)pyridine-2-yl)imidazolidin-1-yl)ethane bis(dichloromanganese(II)) (4)**

A mixture of 0.14 g (1 mmol) of pyridine-2,6-dicarboxaldehyde,<sup>38</sup> 0.19 g (1 mmol) of Mn(OAc)<sub>2</sub>•4H<sub>2</sub>O, and 20 mL of methanol was stirred for 0.5 h, then a solution of 0.34 g (1 mmol) of triethylenetetraamine hydrate in 25 mL of methanol was added dropwise by means of a syringe pump over 4 h. The reaction mixture was stirred for 6 h at room temperature, then concentrated by rotary evaporation to a brown viscous oil, which was washed twice with ether (15, 5 mL), then with hexane (5 mL). After evaporation and drying (0.1 mm), 0.43 g of a brown solid was obtained,

which was dissolved in 5 mL of ethanol. Ether was diffused into the ethanolic solution by keeping it in a closed container saturated with ether vapor, resulting in an off-white precipitate, which was washed with 5 mL of ether and 5 mL of acetone. The solid was recrystallized from ethanol to give 25 mg (8.1%) of **4** as white solid, mp 189 °C (d). Crystals for X-ray crystallography were obtained by slow diffusion of ether into a solution of **4** in methanol.

### **Synthesis of 3,6,9,12,18-pentaaza-16-methylbicyclo[12.3.1]octadeca-1(18),2,12,14,16-pentaene dichloromanganese(II) (5)**

A mixture of 0.97 g (6.5 mmol) of 4-methylpyridine-2,6-dicarboxaldehyde,<sup>38</sup> 1.3 g (6.5 mmol) of MnCl<sub>2</sub>•4H<sub>2</sub>O, 60 mL of water and 25 mL of ethanol was stirred at 50 °C for 0.5 h. The resulting solution was cooled to room temperature and stirred as a solution of 1.5 g (6.5 mmol) of triethylenetetraamine hydrate in 40 mL of water was added dropwise over 2.5 h. The reaction mixture was stirred for 0.5 h at room temperature, boiled under reflux for 3 h, then allowed to stand at room temperature overnight. The resulting brown mixture was concentrated to dryness by rotary evaporation (bath temp. 60 °C). The residue was dried at (0.1 mm) to give the Schiff base complex as a reddish brown solid. A solution of this solid in 60 mL of ethanol was stirred as 2 g (53 mmol) of NaBH<sub>4</sub> was added in one portion. The resulting suspension was stirred at room temperature for 2 h, then at 45-50 °C for 5 h. The solvent was removed by rotary evaporation, the residue was stirred for 10 h with 75 mL of a 0.5 M solution of LiCl in methanol, then the solvent was again removed by rotary evaporation. The residue was extracted with dichloromethane (3 x 15 mL). The combined extracts were dried (Na<sub>2</sub>SO<sub>4</sub>), filtered, and concentrated to dryness by rotary evaporation. The residue was dried (0.1 mm) to give 2.18 g (86%) of a glassy brown solid. The crude product was purified by column chromatography, eluting with 99:1-95:5 (v/v) dichloromethane/methanol, yielding 370 mg (15%) of **5** as a white solid. MS (ESI<sup>+</sup>) *m/z* 353 (M-Cl, 40%), 159 (M-2Cl(2+),

100%). IR (neat,  $\text{cm}^{-1}$ ) 3270 (w), 3219 (w), 2899 (w), 2857 (m), 1616 (m), 1569 (w), 1467 (w), 1336 (w), 1193 (w), 1121 (m), 1013 (m), 867 (s), 797 (s). Anal. Calcd. for  $\text{C}_{14}\text{H}_{25}\text{Cl}_2\text{MnN}_5$ : C, 43.20; H, 6.47; N, 17.99. Found: C, 43.60; H, 6.75; N, 17.83.

**Synthesis of 5,6,7,8,9,10,11,12,14,15,16-undecahydro-2,17-etheno-1,4,7,10,13-benzopentaazacyclopentadecine dichloromanganese(II) (10)**

A solution of 1.1 g (6.4 mmol) of 6,7-dihydro-8(5*H*)-quinolinone-2-carboxaldehyde<sup>39</sup> and 1.3 g (6.5 mmol) of  $\text{MnCl}_2 \cdot 4\text{H}_2\text{O}$  in 75 mL of water and 25 mL of ethanol was stirred at 45-50 °C for 1 h. The resulting pale yellow solution was cooled to room temperature and stirred as a solution of 1.5 g (6.6 mmol) of triethylenetetraamine hydrate in 40 mL of water was added dropwise over 2 h. The reaction mixture was stirred at room temperature for 0.5 h then boiled under reflux for 3 h. The resulting dark brown mixture was cooled to room temperature, filtered, and the filtrate was concentrated to dryness by rotary evaporation (bath temp. 60 °C). The residue was dried at (0.1 mm) overnight to give 2.9 g of a reddish brown solid. The crude product was purified by column chromatography, eluting with 1:99 – 5:95 (v/v) methanol/dichloromethane, yielding 0.83 g (32%) of pure **10**. MS ( $\text{ESI}^+$ )  $m/z$  375 (M-Cl, 10%), 170 (M-2Cl(2+), 100%). IR (neat,  $\text{cm}^{-1}$ ) 3282 (w), 3243 (w), 2906 (w), 2856 (w), 1653 (m), 1584 (w), 1470 (w), 1425 (w), 1333 (w), 1266 (w), 1200 (w), 1115 (s), 1060 (w), 1040 (s), 954 (s), 869 (w), 843 (m), 826 (w), 794 (s), 728 (w). Anal. Calcd. for  $\text{C}_{16}\text{H}_{23}\text{Cl}_2\text{MnN}_5 \cdot 0.5\text{H}_2\text{O}$ : C, 45.73; H, 5.76; N, 16.67. Found: C, 45.98; H, 5.70; N, 16.03.

**Synthesis of 3,4,5,6,7,8,9,10,11,12,13,13a,14,15,16-pentadecahydro-2,17-etheno-1,4,7,10,13-benzopentaazacyclopentadecine dichloromanganese(II) (11)**

A mixture of 1.2 g (7.1 mmol) of 6,7-dihydro-8(5*H*)-quinolinone-2-carboxaldehyde,<sup>39</sup> 1.4 g (7.2 mmol) of  $\text{MnCl}_2 \cdot 4\text{H}_2\text{O}$  and 75 mL of water was stirred at 50 °C for 1 h. The resulting pale yellow solution was allowed to cool to room temperature and stirred as a solution of 1.6 g (6.7 mmol) of

triethylenetetraamine hydrate in 30 mL of water was added dropwise over a period of 50 min. The reaction mixture was stirred at room temperature for 0.5 h then boiled under reflux for 3 h. The resulting brown mixture was cooled to room temperature and concentrated to dryness by rotary evaporation (bath temp. 60 °C). The residue was dried at (0.1 mm) overnight to give **3.10 10** as a reddish brown solid. A solution of this intermediate in 70 mL of ethanol was stirred as 2.2 g (58 mmol) of NaBH<sub>4</sub> was added in one portion. The resulting suspension was stirred at room temperature for 2.5 h, then at 50 °C for 12 h. The solvent was removed by rotary evaporation, then the residue was stirred overnight with 100 mL of a 0.5 M solution of LiCl in methanol, then the solvent was removed by rotary evaporation. A mixture of the residue in 70 mL of water and 10 g (0.2 mole) of NaCl was stirred and filtered, then the filtrate was extracted with dichloromethane (5 x 10 mL). The combined extracts were dried over Na<sub>2</sub>SO<sub>4</sub>. Filtration, rotary evaporation and drying under vacuum gave 1.65 g (59%) of a light brown solid. The crude product was purified by column chromatography, eluting with 9:1 (v/v) dichloromethane/methanol, yielding 1.2 g (43%) of **11** as a white solid, mp 274-281 °C (dec). A sample for microanalysis was washed with ether and dried under vacuum (0.1 mm) for 16 h at room temperature. MS (ESI+) *m/z* 379 (M-Cl, 100%), 172 (M-2Cl(2+), 98%). IR (neat, cm<sup>-1</sup>) 3276 (w), 3267 (w), 3237 (w), 2900 (w), 2860 (w), 2845 (w), 1599 (w), 1572 (w), 1475 (w), 1453 (m), 1337 (w), 1228 (w), 1126 (w), 1110 (m), 1070 (w), 1029 (w), 995 (w), 956 (w), 868 (m), 824 (m), 806 (s), 793 (s) 731 (w). Anal. calcd. for C<sub>16</sub>H<sub>27</sub>Cl<sub>2</sub>MnN<sub>5</sub>: C, 46.28; H, 6.55; N, 16.86. Found: C, 46.66; H, 6.35; N, 16.73.

**Synthesis of 3,4,5,6,7,8,9,10,11,12,13,13a,14,15,16-pentadecahydro-2,17-etheno-1,4,7,10,13-benzopentaazacyclopentadecine (12)**

A solution of 2.3 g (5.6 mmol) of **11** in 70 mL of 2 M HCl in methanol was stirred for 8 h at room temperature. The solution was evaporated to dryness by rotary evaporation (bath temp. 30-35 °C,

50-100 mm). A mixture the residue and 71 mL of 2 M NaOH in methanol was stirred for 10 h. The mixture was filtered and the filtrate was concentrated to dryness by rotary evaporation. The residual solid was extracted with ether (3 x 25 mL). The combined extracts were dried over Na<sub>2</sub>SO<sub>4</sub>. Filtration, rotary evaporation and drying under vacuum gave 1.2 g (73%) of **12** as light yellow solid, mp 85-86 °C. <sup>1</sup>H NMR (CDCl<sub>3</sub>, 500 MHz) δ 7.30 (d, *J* = 8 Hz, 1 H, H18), 6.93 (d, *J* = 8 Hz, 1 H, H19), 3.86 (m, 2 H, H3), 3.74 (m, 1 H, H13a), 3.03 (m, 1 H, H16), 2.92 (m, 1 H, H16'), 2.89-2.68 (m, 12 H, H5,6,8,9,11,12), 2.20 (m, 1 H, H14), 1.99 (m, 1 H, H15), 1.65-1.81 (m, 2 H, H14,15). <sup>13</sup>C NMR (CDCl<sub>3</sub>, 125 MHz) δ 156.7, 155.9, 137.1, 130.2, 120.2, 57.9, 53.3, 49.1, 48.9, 48.52, 48.46, 48.2, 46.6, 29.3, 28.6, 20.2. MS (ESI<sup>+</sup>) *m/z* 290 (M+1, 100%). IR (neat, cm<sup>-1</sup>) 3291 (w), 3264 (w), 3208 (w), 2928 (w), 2879 (w), 2804 (m), 1587 (w), 1569 (w), 1460 (s), 1403 (w), 1326 (w), 1291 (w), 1234 (w), 1129 (m), 1101 (w), 922 (w), 828 (w), 812 (w), 788 (w), 735 (w). Anal. calcd. for C<sub>16</sub>H<sub>27</sub>N<sub>5</sub>: C, 66.40; H, 9.40; N, 24.20. Found: C, 66.13; H, 9.14; N, 24.48.

**Synthesis of 3,4,5,6,7,8,9,10,11,12,13,13a,14,15,16-pentadecahydro-2,17-etheno-1,4,7,10,13-benzopentaazacyclopentadecine dichlorocopper(II) (13)**

To a solution of 47 mg (0.16 mmol) of **12** in 1 mL of absolute ethanol, a solution of 21 mg (0.16 mmol) of CuCl<sub>2</sub> in 1 mL of absolute ethanol was added dropwise. The mixture was swirled for 0.5 h at 45-50 °C to obtain a deep blue solution, which was concentrated to dryness by rotary evaporation. The residue was dried (0.1 mm) to give 70 mg of a blue solid, which was washed with 5 mL of anhydrous ether. A solution of the residue in 10 mL of dichloromethane was dried (Na<sub>2</sub>SO<sub>4</sub>), filtered, and concentrated to dryness by rotary evaporation. Drying (0.1 mm) gave 60 mg (91%) of **13** as a blue solid. MS (ESI<sup>+</sup>) *m/z* 387 (M-Cl, 20%); 351 (M-H-2Cl, 100%), 176 (M-2Cl(2+), 67%). IR (neat, cm<sup>-1</sup>) 3363 (br, m), 3091 (br, m), 2915 (m), 2870 (m), 1605 (w), 1578 (w), 1485 (s), 1425 (s), 1342 (m), 1096 (m), 1037 (w), 1013 (w), 968 (s), 947 (m), 881 (w), 848 (m), 809

(m), 791 (w), 773 (w). Anal. calcd. for C<sub>16</sub>H<sub>27</sub>Cl<sub>2</sub>CuN<sub>5</sub>: C, 45.34; H, 6.42; N, 16.52. Found: C, 45.53; H, 6.80; N, 16.31.

**Synthesis of 3,4,5,6,7,8,9,10,11,12,13,13a,14,15,16-pentadecahydro-2,17-etheno-1,4,7,10,13-benzopentaazacyclopentadecine trichloroiron(III) (14)**

To a solution of 46 mg (0.15 mmol) of **12** in 1 mL of absolute ethanol, a solution of 24 mg (0.15 mmol) of FeCl<sub>3</sub> in 1 mL of absolute ethanol was added dropwise. The resulting mixture was swirled for 0.5 h at 45-50 °C, then the solvent was removed by rotary evaporation and the residue was dried (0.1 mm, 8 h). The resulting blue solid was washed with 5 mL of anhydrous ether. A solution of this solid in 10 mL of dichloromethane was dried (Na<sub>2</sub>SO<sub>4</sub>), filtered, and concentrated to dryness by rotary evaporation. Drying (0.1 mm) gave 60 mg (88%) of **14** as a green solid. MS (ESI<sup>+</sup>) *m/z* 379 (M-H-2Cl, 85%), 343 (M-2H-3Cl, 100%). IR (neat, cm<sup>-1</sup>) 3115 (w), 2912 (w), 2867 (w), 1653 (w), 1602 (w), 1581 (w), 1485 (m), 1449 (s), 1369 (w), 1333 (w), 1288 (w), 1231 (w), 1108 (s), 1055 (m), 1034 (w), 980 (s), 956 (s), 917 (s), 893 (m), 860 (m), 836 (m), 791 (w), 732 (w). Anal. calcd. for C<sub>16</sub>H<sub>27</sub>Cl<sub>3</sub>FeN<sub>5</sub>: C, 42.55; H, 6.03; N, 15.51. Found: C, 42.60; H, 6.49; N, 15.39.

**Synthesis of 3,4,5,6,7,8,9,10,11,12,13,13a,14,15,16-pentadecahydro-2,17-etheno-1,4,7,10,13-benzopentaazacyclopentadecine dichlorozinc(II) (15)**

To a solution of 31 mg (0.11 mmol) of **12** in 1 mL of absolute ethanol, a solution of 15 mg (0.11 mmol) of ZnCl<sub>2</sub> in 1 mL of absolute ethanol was added dropwise. The resulting mixture was swirled for 0.5 h at 45-50 °C, then the solvent was removed by rotary evaporation and residue was dried (0.1 mm) to give a white solid, which was washed with 5 mL of anhydrous ether. A solution of this solid in 10 mL of dichloromethane was dried (Na<sub>2</sub>SO<sub>4</sub>), filtered, and concentrated to dryness by rotary evaporation. The residue was dried (0.1 mm) to give 42 mg (91%) of **15** as a white solid, mp 132-210 °C (dec.). MS (ESI<sup>+</sup>) *m/z* 388 (M-Cl, 50%), 352 (M-H-2Cl, 10%), 176.5 (M-2Cl(2+),

100%). IR (neat,  $\text{cm}^{-1}$ ) 3402 (br, w), 3184 (m), 2921 (w), 2867 (w), 1602 (w), 1581 (w), 1449 (s), 1342 (w), 1096 (s), 938 (s), 866 (w), 782 (w), 723 (w). Anal. calcd. for  $\text{C}_{16}\text{H}_{27}\text{Cl}_2\text{N}_5\text{Zn}\cdot 1.5\text{H}_2\text{O}$ : C, 42.44; H, 6.68; N, 15.47. Found: C, 42.50; H, 6.60; N, 15.27.

**Synthesis of 2,3,4,6,7,8,9,10,11,12,13,15,16,17-tetradecahydro-1,18-methenodibenzo[b,e]-[1.4.7.10.13]pentaazacyclopentadecine dichloromanganese(II) (16)**

A mixture of 1.2 g (5.3 mmol) of 2,3,7,8-tetrahydroacridine-4,5(1*H*,6*H*)-dione,<sup>40</sup> 1.1 g (5.4 mmol) of  $\text{MnCl}_2\cdot 4\text{H}_2\text{O}$ , 100 mL of ethanol and 5 mL of water was stirred at 50-55 °C for 0.5 h. The resulting cloudy reddish brown solution was allowed to cool to room temperature and stirred as a solution of 1.15 g (5.0 mmol) of triethylenetetraamine hydrate in 15 mL of ethanol was added dropwise over a period of 2 h by means of a syringe pump. The reaction mixture was stirred at room temperature for 0.5 h and then boiled under reflux for 6 h. The resulting black mixture was cooled to room temperature, filtered and the filtrate was concentrated to dryness by rotary evaporation (bath temp. 60 °C). The residue was dried (0.1 mm) to give crude **16** as a black solid, MS (ESI<sup>+</sup>) *m/z* 415 (M-Cl, <10%), 379 (M-H-2Cl, <5%), 190 (M-2Cl(2+), 100%). The product was purified by column chromatography, eluting with 99:1-95:5 (v/v) dichloromethane/methanol, yielding 0.44 g (20%) of **16** as a dark reddish brown solid. IR (neat,  $\text{cm}^{-1}$ ) 3270 (w), 2926 (w), 2900 (w), 2861 (w), 1652 (s), 1566 (w), 1457 (m), 1437 (w), 1348 (w), 1324 (w), 1262 (w), 1227 (s), 1172 (w), 1112 (m), 1074 (w), 1035 (m), 940 (w), 906 (w), 858 (m), 799 (s), 749 (s). Anal. Calcd. for  $\text{C}_{19}\text{H}_{27}\text{Cl}_2\text{MnN}_5$ : C, 50.57; H, 6.03; N, 15.52. Found: C, 50.43; H, 6.40; N, 15.13.



**Synthesis of 2,3,4,4a,5,6,7,8,9,10,11,12,13,14,14a,15,16,17-octadecahydro-1,18-methenodibenzo[b,e][1.4.7.10.13]pentaazacyclopentadecine dichloromangan-ese(II) (17)**

A mixture of 0.43 g (2.0 mmol) of 2,3,7,8-tetrahydroacridine-4,5(1*H*,6*H*)-dione,<sup>40</sup> 0.41 g (2.1 mmol) of MnCl<sub>2</sub>•4H<sub>2</sub>O, 30 mL of ethanol, and 10 mL of water was stirred at 50 °C for 10 min. The resulting cloudy brown solution was allowed to cool to room temperature and stirred as a solution of 0.45 g (2.0 mmol) of triethylenetetraamine hydrate in 5 mL of water was added dropwise over a period of 30 min. The reaction mixture was stirred at room temperature for 0.5 h then boiled under reflux for 5 h. The resulting black mixture was cooled to room temperature and concentrated to dryness by rotary evaporation (bath temp. 60 °C). The residue was dried at (0.1 mm) to give 1 **16** as a black solid. A solution of this intermediate in 25 mL of absolute ethanol was stirred as 0.62 g (16 mmol) of NaBH<sub>4</sub> was added in one portion. The resulting suspension was stirred at room temperature for 3 h, then at 40-45 °C for 12 h. An additional 0.30 g (7.9 mmol) portion of NaBH<sub>4</sub> was added, then the reaction mixture was stirred for 3 h at 55 °C. The solvent was removed by rotary evaporation, the residue was stirred for 8 h with 20 mL of a 0.5 M solution of LiCl in methanol, then the solvent was removed by rotary evaporation. The residue was powdered and extracted with 20 mL of dichloromethane. After filtration, the residue was further extracted with dichloromethane (2 x 3 mL). The combined dichloromethane extracts were dried over Na<sub>2</sub>SO<sub>4</sub>, filtered, and concentrated to dryness by rotary evaporation. Drying (0.1 mm) gave 0.65 g (73%) of a yellowish brown solid. The crude product was purified by column chromatography, eluting with 19:1 (v/v) dichloromethane/methanol, yielding 0.26 g (29%) of **17** as a white solid, mp 295-298 °C (dec). A sample for microanalysis and X-ray diffraction was crystallized by diffusing ether into a dichloromethane solution. MS (ESI<sup>+</sup>) *m/z* 419 (M-Cl, 100%), 192 (M-2Cl(2+), 55%). IR (neat, cm<sup>-1</sup>

<sup>1</sup>) 3234 (w), 2932 (w), 2915 (w), 2854 (w), 1575 (w), 1459 (m), 1452 (m), 1345 (w), 1279 (w), 1249 (w), 1195 (w), 1119 (s), 1081 (w), 1037 (w), 953 (m), 890 (s), 823 (s), 811 (s), 785 (s), 756 (m), 732 (w). Anal. calcd. for C<sub>19</sub>H<sub>31</sub>Cl<sub>2</sub>MnN<sub>5</sub>: C, 50.12; H, 6.86; N, 15.38. Found: C, 50.10; H, 6.57; N, 15.24.

**Synthesis of 2,3,4,4a,5,6,7,8,9,10,11,12,13,14,14a,15,16,17-octadecahydro-1,18-methenodibenzo[b,e][1.4.7.10.13]pentaazacyclopentadecine (18)**

A solution of 0.51 g (1.2 mmol) of **17** in 14.5 mL of 2 M HCl in methanol was stirred for 10 h at room temperature. The solution was evaporated to dryness by rotary evaporation (bath temp. 30-35 °C; 50-100 mm). A solution of 2 M NaOH in methanol (15 mL) was added to the residue and the resulting mixture was stirred for 2.5 h. The mixture was filtered and the filtrate was concentrated to dryness by rotary evaporation. The residue was dried (0.1 mm) for 12 h at room temperature then extracted with ether (4 x 15 mL). The combined extracts were dried over Na<sub>2</sub>SO<sub>4</sub>, filtered, and concentrated to dryness by rotary evaporation. The residue was dried (0.1 mm) to give 0.27 g (74%) of **18** as a yellowish white solid, mp 155-156 °C. <sup>1</sup>H NMR (500 MHz, CDCl<sub>3</sub>) δ 7.04 (s, 1 H, H19), 3.71 (br, 2 H, NH), 3.64 (m, 2 H, H4a,14a), 3.07 (m, 2 H, H9,10), 2.99 (m, 2 H, H6,13), 2.87 (m, 2 H, H7,12), 2.72 (m, 10 H, 2,6',7',9',10',12',13',17), 2.22 (m, 2 H, H4,15), 1.96 (m, 2 H, H3,16), 1.74 (m, 2 H, H3',16'), 1.60 (m, 2 H, H4',15'). <sup>13</sup>C NMR (125 MHz, CDCl<sub>3</sub>) δ 154.0, 137.1, 129.8, 57.7, 49.0, 48.0, 47.0, 29.5, 28.4, 20.6. MS (ESI<sup>+</sup>) *m/z* 352 (M+Na, 10%), 330 (M+H, 100%). IR (neat, cm<sup>-1</sup>) 3318 (w), 3285 (w), 3202 (w), 2924 (w), 2881 (w), 2808 (m), 1566 (w), 1448 (s), 1420 (m), 1336 (w), 1243 (w), 1139 (m), 1118 (s), 1094 (w), 1049 (w), 926 (m), 866 (w), 848 (w), 783 (m), 730 (m). Anal. calcd. for C<sub>19</sub>H<sub>31</sub>N<sub>5</sub>•0.25H<sub>2</sub>O: C, 68.33; H, 9.51; N, 20.97. Found: C, 68.25; H, 9.87; N, 20.99.

**Synthesis of 2,3,4,4a,5,6,7,8,9,10,11,12,13,14,14a,15,16,17-octadecahydro-1,18-methenodibenzo[b,e][1.4.7.10.13]pentaazacyclopentadecine dichlorocopper(II) (19)**

To a solution of 21 mg (0.06 mmol) **8** in 1 mL of absolute ethanol, a solution of 8.4 mg (0.06 mmol) of CuCl<sub>2</sub> in 7 mL of absolute ethanol was added dropwise. The mixture was sonicated for 0.5 h to obtain a deep blue solution, which was concentrated to dryness by rotary evaporation. The residue was washed with 2 mL of ether then dissolved in 5 mL of dichloromethane. Filtration, rotary evaporation and drying (0.1 mm) gave 28 mg (97%) of **19** as a blue solid. MS (ESI<sup>+</sup>) *m/z* 427 (M-Cl, 20%), 391 (M-H-2Cl, 88%), 196 (M-2Cl(2+), 100%). IR (neat) 3408 (br, w), 3175 (w), 3091 (w), 2909 (m), 2846 (w), 1593 (w), 1479 (m), 1446 (w), 1410 (w), 1339 (w), 1282 (w), 1228 (w), 1084 (s), 1001 (m), 914 (w), 857 (w), 785 (w), 723 (w). Anal. calcd. for C<sub>19</sub>H<sub>31</sub>Cl<sub>2</sub>CuN<sub>5</sub>•CH<sub>2</sub>Cl<sub>2</sub>: C, 43.77; H, 6.06; N, 12.76. Found: C, 43.18; H, 6.25; N, 13.20.

**Synthesis of 2,3,4,4a,5,6,7,8,9,10,11,12,13,14,14a,15,16,17-octadecahydro-1,18-methenodibenzo[b,e][1.4.7.10.13]pentaazacyclopentadecine trichloroiron(III) (20)**

To a solution of 27 mg (0.08 mmol) **18** in 1 mL of absolute ethanol, a solution of 13 mg (0.08 mmol) of FeCl<sub>3</sub> in 4 mL of absolute ethanol was added dropwise. The mixture was sonicated for 0.5 h to obtain a deep blue solution, which was concentrated to dryness by rotary evaporation. The residue was washed with 2 mL of ether then dissolved in 5 mL of dichloromethane. Filtration, rotary evaporation and drying (0.1 mm) gave 42 mg (100%) of **20** as a light green solid. MS (ESI<sup>+</sup>) *m/z* 455 (M-Cl, 80%), 419 (M-H-2Cl, 100%), 383 (M-2H-3Cl, 12%). IR (neat, cm<sup>-1</sup>) 3357 (br, w), 3217 (br, w), 2929 (w), 2864 (w), 1632 (w), 1584 (w), 1449 (s), 1369 (w), 1336 (w), 1282 (w), 1254 (w), 1207 (w), 1111 (s), 1052 (w), 974 (m), 944 (m), 914 (m) 860 (m), 833 (w), 762 (w), 723 (w). Anal. calcd. for C<sub>19</sub>H<sub>31</sub>Cl<sub>3</sub>FeN<sub>5</sub>•H<sub>2</sub>O: C, 44.77; H, 6.53; N, 13.74. Found: C, 44.91; H, 6.67; N, 13.74.

**Synthesis of 2,3,4,4a,5,6,7,8,9,10,11,12,13,14,14a,15,16,17-octadecahydro-1,18-methenodibenzo[b,e][1.4.7.10.13]pentaazacyclopentadecine dichlorozinc(II) (21)**

To a solution of 33 mg (0.10 mmol) of **18** in 1 mL of absolute ethanol, a solution of 14 mg (0.10 mmol) of ZnCl<sub>2</sub> in 3 mL of absolute ethanol was added dropwise. The mixture was sonicated for 0.5 h to obtain a deep blue solution, which was concentrated to dryness by rotary evaporation. The residue was washed with 2 mL of ether then dissolved in 5 mL of dichloromethane. Filtration, rotary evaporation and drying (0.1 mm) gave 46 mg (99%) of **21** as a solid. MS (ESI<sup>+</sup>) *m/z* 428 (M-Cl, 100%), 392 (M-H-2Cl, 22%), 196.5 (M-2Cl(2+), 98%). IR (neat, cm<sup>-1</sup>) 3196 (br, w), 2924 (m), 2861 (w), 1638 (w), 1578 (w), 1455 (s), 1342 (w), 1249 (w), 1192 (w), 1096 (m), 1001 (w), 959 (m), 929 (m), 723 (w). Anal. calcd. for C<sub>19</sub>H<sub>31</sub>Cl<sub>2</sub>ZnN<sub>5</sub>•H<sub>2</sub>O: C, 47.17; H, 6.87; N, 14.48. Found: C, 46.77; H, 7.04; N, 14.58

Table 1. Crystallographic data for **2**, **4**, and **17**.

|                                                | <b>2 (BJF175)</b>                                                              | <b>4 (BJF224)</b>                                                                                  | <b>17 (BJF440)</b>                                                                |
|------------------------------------------------|--------------------------------------------------------------------------------|----------------------------------------------------------------------------------------------------|-----------------------------------------------------------------------------------|
| Emp. formula                                   | C <sub>13</sub> H <sub>23</sub> I <sub>2</sub> MnN <sub>5</sub> O <sub>2</sub> | C <sub>64</sub> H <sub>112</sub> Cl <sub>8</sub> Mn <sub>4</sub> N <sub>28</sub><br>O <sub>3</sub> | C <sub>39</sub> H <sub>63</sub> Cl <sub>7</sub> Mn <sub>2</sub> N <sub>10</sub> O |
| formula weight                                 | 590.10                                                                         | 1825.18                                                                                            | 1046.02                                                                           |
| <i>T</i> (K)                                   | 100(2)                                                                         | 100(2)                                                                                             | 100(2)                                                                            |
| wavelength (Å)                                 | 0.71073                                                                        | 0.71073                                                                                            | 0.71073                                                                           |
| crystal system                                 | Monoclinic                                                                     | Monoclinic                                                                                         | Monoclinic                                                                        |
| space group                                    | P2(1)/c                                                                        | p2(1)/n                                                                                            | C2/c                                                                              |
| <i>a</i> (Å)                                   | 7.27960(10)                                                                    | 14.5669(9)                                                                                         | 33.9815(7)                                                                        |
| <i>b</i> (Å)                                   | 27.9338(6)                                                                     | 18.4411(10)                                                                                        | 12.1081(3)                                                                        |
| <i>c</i> (Å)                                   | 10.3113(2)                                                                     | 15.6178(7)                                                                                         | 25.8046(5)                                                                        |
| $\alpha$ (deg)                                 | 90                                                                             | 90                                                                                                 | 90                                                                                |
| $\beta$ (deg)                                  | 106.8240(10)                                                                   | 90.728(2)                                                                                          | 117.0730(10)                                                                      |
| $\gamma$ (deg)                                 | 90                                                                             | 90                                                                                                 | 90                                                                                |
| volume (Å <sup>3</sup> )                       | 2007.03(6)                                                                     | 4195.1(4)                                                                                          | 9454.0(4)                                                                         |
| <i>Z</i>                                       | 4                                                                              | 2                                                                                                  | 8                                                                                 |
| <i>D</i> <sub>calcd</sub> (Mg/m <sup>3</sup> ) | 1.953                                                                          | 1.445                                                                                              | 1.470                                                                             |
| abs coeff (mm <sup>-1</sup> )                  | 3.748                                                                          | 0.904                                                                                              | 0.973                                                                             |
| cryst size (mm <sup>3</sup> )                  | 0.28 x 0.16 x 0.09                                                             | 0.31 x 0.13 x 0.07                                                                                 | 0.31 x 0.30 x 0.12                                                                |
| $\theta$ range (deg)                           | 1.46 to 32.50                                                                  | 1.71 to 25.50                                                                                      | 1.35 to 29.94                                                                     |
|                                                | -10 ≤ <i>h</i> ≤ 10                                                            | -16 ≤ <i>h</i> ≤ 17                                                                                | -47 ≤ <i>h</i> ≤ 47                                                               |
| index ranges                                   | -42 ≤ <i>k</i> ≤ 41                                                            | -22 ≤ <i>k</i> ≤ 17                                                                                | -16 ≤ <i>k</i> ≤ 17                                                               |
|                                                | -15 ≤ <i>l</i> ≤ 13                                                            | -18 ≤ <i>l</i> ≤ 10                                                                                | -36 ≤ <i>l</i> ≤ 34                                                               |
| reflns collected                               | 33211                                                                          | 20351                                                                                              | 62351                                                                             |
| indep reflns                                   | 7122                                                                           | 7788                                                                                               | 13557                                                                             |
| abs corr.                                      | R <sub>int</sub> = 0.1177                                                      | R <sub>int</sub> = 0.0803                                                                          | R <sub>int</sub> = 0.0277                                                         |
| data/restr/par                                 | SADABS                                                                         | SADABS                                                                                             | SADABS                                                                            |
| <i>a</i>                                       | 7122 / 0 / 230                                                                 | 7788 / 0 / 482                                                                                     | 13557 / 0 / 565                                                                   |
| GOF on F <sup>2</sup>                          | 1.118                                                                          | 0.975                                                                                              | 1.062                                                                             |
| final <i>R</i> indices                         | R <sub>1</sub> = 0.0497, wR <sub>2</sub> = 0.1199                              | R <sub>1</sub> = 0.0597, wR <sub>2</sub> = 0.1166                                                  | R <sub>1</sub> = 0.0313, wR <sub>2</sub> = 0.0804                                 |
| [ <i>I</i> > 2σ( <i>I</i> )]                   |                                                                                |                                                                                                    |                                                                                   |
| <i>R</i> indices (all data)                    | R <sub>1</sub> = 0.0566, wR <sub>2</sub> = 0.1233                              | R <sub>1</sub> = 0.1170, wR <sub>2</sub> = 0.1351                                                  | R <sub>1</sub> = 0.0385, wR <sub>2</sub> = 0.0843                                 |
| CCDC                                           | 1062374                                                                        | 1062375                                                                                            | 1062376                                                                           |

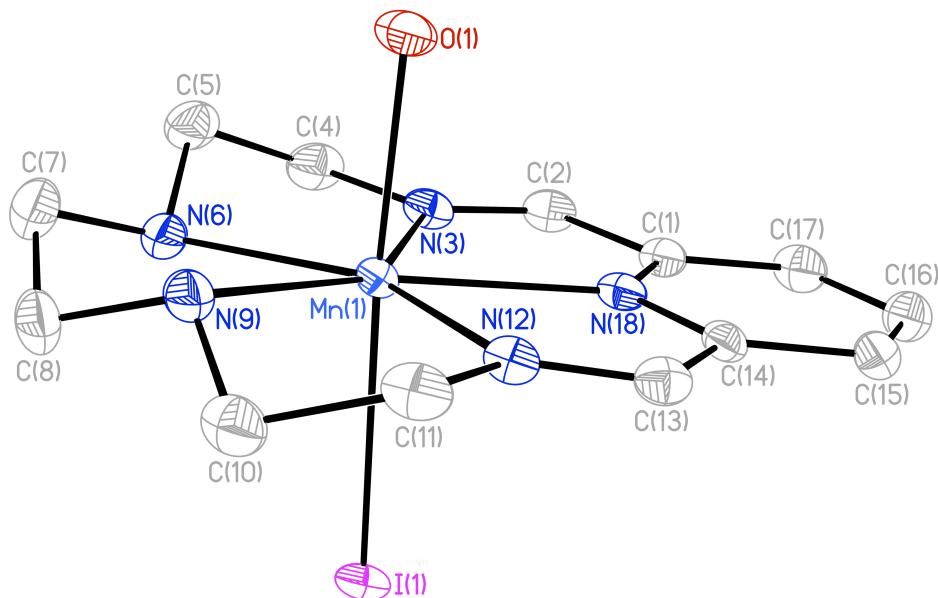

Figure 1. Numbered thermal ellipsoid plot for **2**.

Table 2. Crystal data and structure refinement for **2**.

|                                      |                                                              |                                |
|--------------------------------------|--------------------------------------------------------------|--------------------------------|
| Identification code                  | SH11                                                         |                                |
| Empirical formula                    | $C_{13}H_{23}I_2MnN_5O_2$                                    |                                |
| Formula weight                       | 590.10                                                       |                                |
| Temperature                          | 100(2) K                                                     |                                |
| Wavelength                           | 0.71073 Å                                                    |                                |
| Crystal system                       | Monoclinic                                                   |                                |
| Space group                          | $P2(1)/c$                                                    |                                |
| Unit cell dimensions                 | $a = 7.27960(10)$ Å                                          | $\alpha = 90^\circ$ .          |
|                                      | $b = 27.9338(6)$ Å                                           | $\beta = 106.8240(10)^\circ$ . |
|                                      | $c = 10.3113(2)$ Å                                           | $\gamma = 90^\circ$ .          |
| Volume                               | $2007.03(6)$ Å <sup>3</sup>                                  |                                |
| Z                                    | 4                                                            |                                |
| Density (calculated)                 | 1.953 Mg/m <sup>3</sup>                                      |                                |
| Absorption coefficient               | 3.748 mm <sup>-1</sup>                                       |                                |
| F(000)                               | 1132                                                         |                                |
| Crystal size                         | 0.28 x 0.16 x 0.09 mm <sup>3</sup>                           |                                |
| Theta range for data collection      | 1.46 to 32.50°.                                              |                                |
| Index ranges                         | $-10 \leq h \leq 10, -42 \leq k \leq 41, -15 \leq l \leq 13$ |                                |
| Reflections collected                | 33211                                                        |                                |
| Independent reflections              | 7122 [ $R(\text{int}) = 0.1177$ ]                            |                                |
| Completeness to theta = 32.50°       | 98.2 %                                                       |                                |
| Absorption correction                | SADABS                                                       |                                |
| Max. and min. transmission           | 0.7387 and 0.4244                                            |                                |
| Refinement method                    | Full-matrix least-squares on $F^2$                           |                                |
| Data / restraints / parameters       | 7122 / 0 / 230                                               |                                |
| Goodness-of-fit on $F^2$             | 1.118                                                        |                                |
| Final R indices [ $I > 2\sigma(I)$ ] | $R1 = 0.0497, wR2 = 0.1199$                                  |                                |
| R indices (all data)                 | $R1 = 0.0566, wR2 = 0.1233$                                  |                                |
| Extinction coefficient               | 0.00013(19)                                                  |                                |
| Largest diff. peak and hole          | 5.535 and -2.566 e.Å <sup>-3</sup>                           |                                |

Table 3. Atomic coordinates ( $\times 10^4$ ) and equivalent isotropic displacement parameters ( $\text{\AA}^2 \times 10^3$ ) for **2**.  $U(\text{eq})$  is defined as one third of the trace of the orthogonalized  $U^{ij}$  tensor.

|       | x        | y       | z       | U(eq) |
|-------|----------|---------|---------|-------|
| Mn(1) | 8800(1)  | 1071(1) | 2221(1) | 16(1) |
| I(1)  | 12741(1) | 684(1)  | 3091(1) | 20(1) |
| I(2)  | 4287(1)  | 1856(1) | 6569(1) | 25(1) |
| N(3)  | 8276(5)  | 809(1)  | 4198(4) | 20(1) |
| N(6)  | 9758(6)  | 1668(1) | 3782(5) | 25(1) |
| N(9)  | 9389(6)  | 1703(1) | 940(5)  | 25(1) |
| N(12) | 8479(5)  | 791(1)  | 73(3)   | 17(1) |
| N(18) | 7786(5)  | 302(1)  | 2018(4) | 17(1) |
| O(1)  | 5761(5)  | 1310(1) | 1580(4) | 26(1) |
| O(2)  | 5197(8)  | 2093(2) | 31(4)   | 39(1) |
| C(1)  | 7433(6)  | 76(1)   | 3061(4) | 18(1) |
| C(2)  | 7706(6)  | 383(2)  | 4281(4) | 21(1) |
| C(4)  | 8592(7)  | 1157(2) | 5294(5) | 28(1) |
| C(5)  | 8542(7)  | 1660(2) | 4697(5) | 29(1) |
| C(7)  | 9790(8)  | 2128(2) | 3075(6) | 33(1) |
| C(8)  | 10620(8) | 2048(2) | 1896(6) | 33(1) |
| C(10) | 10164(7) | 1522(2) | -130(5) | 26(1) |
| C(11) | 8853(6)  | 1127(2) | -896(5) | 24(1) |
| C(13) | 7986(6)  | 361(2)  | -229(4) | 19(1) |
| C(14) | 7587(5)  | 67(1)   | 860(4)  | 17(1) |
| C(15) | 7012(6)  | -412(2) | 687(5)  | 24(1) |
| C(16) | 6658(7)  | -646(2) | 1773(5) | 26(1) |
| C(17) | 6863(6)  | -404(2) | 2982(5) | 24(1) |

Table 4. Bond lengths [ $\text{\AA}$ ] and angles [ $^\circ$ ] for **2**.

|             |           |              |          |
|-------------|-----------|--------------|----------|
| Mn(1)-O(1)  | 2.221(3)  | C(1)-C(17)   | 1.397(6) |
| Mn(1)-N(18) | 2.261(3)  | C(1)-C(2)    | 1.487(6) |
| Mn(1)-N(6)  | 2.284(4)  | C(2)-H(2A)   | 0.9500   |
| Mn(1)-N(12) | 2.295(4)  | C(4)-C(5)    | 1.529(7) |
| Mn(1)-N(3)  | 2.299(4)  | C(4)-H(4A)   | 0.9900   |
| Mn(1)-N(9)  | 2.320(4)  | C(4)-H(4B)   | 0.9900   |
| Mn(1)-I(1)  | 2.9521(6) | C(5)-H(5A)   | 0.9900   |
| N(3)-C(2)   | 1.272(6)  | C(5)-H(5B)   | 0.9900   |
| N(3)-C(4)   | 1.458(6)  | C(7)-C(8)    | 1.522(8) |
| N(6)-C(5)   | 1.469(7)  | C(7)-H(7A)   | 0.9900   |
| N(6)-C(7)   | 1.481(7)  | C(7)-H(7B)   | 0.9900   |
| N(6)-H(6)   | 0.85(7)   | C(8)-H(8A)   | 0.9900   |
| N(9)-C(10)  | 1.467(7)  | C(8)-H(8)    | 0.9900   |
| N(9)-C(8)   | 1.481(6)  | C(10)-C(11)  | 1.522(7) |
| N(9)-H(3N)  | 0.77(6)   | C(10)-H(10A) | 0.9900   |
| N(12)-C(13) | 1.267(5)  | C(10)-H(10B) | 0.9900   |
| N(12)-C(11) | 1.452(5)  | C(11)-H(11A) | 0.9900   |
| N(18)-C(14) | 1.332(5)  | C(11)-H(11B) | 0.9900   |
| N(18)-C(1)  | 1.335(5)  | C(13)-C(14)  | 1.487(6) |
| O(1)-H(1W)  | 0.8400    | C(13)-H(13A) | 0.9500   |
| O(1)-H(2W)  | 0.89(6)   | C(14)-C(15)  | 1.400(5) |
| O(2)-H(3W)  | 0.75(7)   | C(15)-C(16)  | 1.383(7) |
| O(2)-H(4W)  | 0.80(10)  | C(15)-H(15A) | 0.9500   |

|                   |            |                     |          |
|-------------------|------------|---------------------|----------|
| C(16)-C(17)       | 1.388(7)   | N(3)-C(2)-H(2A)     | 121.7    |
| C(16)-H(16A)      | 0.9500     | C(1)-C(2)-H(2A)     | 121.7    |
| C(17)-H(17A)      | 0.9500     | N(3)-C(4)-C(5)      | 108.6(4) |
|                   |            | N(3)-C(4)-H(4A)     | 110.0    |
| O(1)-Mn(1)-N(18)  | 89.34(12)  | C(5)-C(4)-H(4A)     | 110.0    |
| O(1)-Mn(1)-N(6)   | 93.67(14)  | N(3)-C(4)-H(4B)     | 110.0    |
| N(18)-Mn(1)-N(6)  | 141.68(15) | C(5)-C(4)-H(4B)     | 110.0    |
| O(1)-Mn(1)-N(12)  | 90.07(13)  | H(4A)-C(4)-H(4B)    | 108.3    |
| N(18)-Mn(1)-N(12) | 69.43(12)  | N(6)-C(5)-C(4)      | 109.0(4) |
| N(6)-Mn(1)-N(12)  | 148.60(14) | N(6)-C(5)-H(5A)     | 109.9    |
| O(1)-Mn(1)-N(3)   | 87.29(13)  | C(4)-C(5)-H(5A)     | 109.9    |
| N(18)-Mn(1)-N(3)  | 69.31(13)  | N(6)-C(5)-H(5B)     | 109.9    |
| N(6)-Mn(1)-N(3)   | 72.69(15)  | C(4)-C(5)-H(5B)     | 109.9    |
| N(12)-Mn(1)-N(3)  | 138.67(13) | H(5A)-C(5)-H(5B)    | 108.3    |
| O(1)-Mn(1)-N(9)   | 86.20(13)  | N(6)-C(7)-C(8)      | 109.4(4) |
| N(18)-Mn(1)-N(9)  | 141.32(14) | N(6)-C(7)-H(7A)     | 109.8    |
| N(6)-Mn(1)-N(9)   | 76.98(16)  | C(8)-C(7)-H(7A)     | 109.8    |
| N(12)-Mn(1)-N(9)  | 72.17(14)  | N(6)-C(7)-H(7B)     | 109.8    |
| N(3)-Mn(1)-N(9)   | 148.47(15) | C(8)-C(7)-H(7B)     | 109.8    |
| O(1)-Mn(1)-I(1)   | 175.99(9)  | H(7A)-C(7)-H(7B)    | 108.2    |
| N(18)-Mn(1)-I(1)  | 86.73(9)   | N(9)-C(8)-C(7)      | 108.9(4) |
| N(6)-Mn(1)-I(1)   | 88.94(10)  | N(9)-C(8)-H(8A)     | 109.9    |
| N(12)-Mn(1)-I(1)  | 89.28(9)   | C(7)-C(8)-H(8A)     | 109.9    |
| N(3)-Mn(1)-I(1)   | 90.58(9)   | N(9)-C(8)-H(8)      | 109.9    |
| N(9)-Mn(1)-I(1)   | 97.37(10)  | C(7)-C(8)-H(8)      | 109.9    |
| C(2)-N(3)-C(4)    | 123.6(4)   | H(8A)-C(8)-H(8)     | 108.3    |
| C(2)-N(3)-Mn(1)   | 119.9(3)   | N(9)-C(10)-C(11)    | 108.7(4) |
| C(4)-N(3)-Mn(1)   | 116.5(3)   | N(9)-C(10)-H(10A)   | 109.9    |
| C(5)-N(6)-C(7)    | 115.4(4)   | C(11)-C(10)-H(10A)  | 109.9    |
| C(5)-N(6)-Mn(1)   | 108.8(3)   | N(9)-C(10)-H(10B)   | 109.9    |
| C(7)-N(6)-Mn(1)   | 109.4(3)   | C(11)-C(10)-H(10B)  | 109.9    |
| C(5)-N(6)-H(6)    | 107(5)     | H(10A)-C(10)-H(10B) | 108.3    |
| C(7)-N(6)-H(6)    | 113(5)     | N(12)-C(11)-C(10)   | 109.0(4) |
| Mn(1)-N(6)-H(6)   | 103(5)     | N(12)-C(11)-H(11A)  | 109.9    |
| C(10)-N(9)-C(8)   | 115.8(4)   | C(10)-C(11)-H(11A)  | 109.9    |
| C(10)-N(9)-Mn(1)  | 109.9(3)   | N(12)-C(11)-H(11B)  | 109.9    |
| C(8)-N(9)-Mn(1)   | 107.0(3)   | C(10)-C(11)-H(11B)  | 109.9    |
| C(10)-N(9)-H(3N)  | 119(4)     | H(11A)-C(11)-H(11B) | 108.3    |
| C(8)-N(9)-H(3N)   | 100(4)     | N(12)-C(13)-C(14)   | 116.2(4) |
| Mn(1)-N(9)-H(3N)  | 104(4)     | N(12)-C(13)-H(13A)  | 121.9    |
| C(13)-N(12)-C(11) | 122.6(4)   | C(14)-C(13)-H(13A)  | 121.9    |
| C(13)-N(12)-Mn(1) | 120.2(3)   | N(18)-C(14)-C(15)   | 122.4(4) |
| C(11)-N(12)-Mn(1) | 117.2(3)   | N(18)-C(14)-C(13)   | 114.3(3) |
| C(14)-N(18)-C(1)  | 119.5(4)   | C(15)-C(14)-C(13)   | 123.3(4) |
| C(14)-N(18)-Mn(1) | 119.8(3)   | C(16)-C(15)-C(14)   | 117.8(4) |
| C(1)-N(18)-Mn(1)  | 120.6(3)   | C(16)-C(15)-H(15A)  | 121.1    |
| Mn(1)-O(1)-H(1W)  | 109.5      | C(14)-C(15)-H(15A)  | 121.1    |
| Mn(1)-O(1)-H(2W)  | 121(4)     | C(15)-C(16)-C(17)   | 120.0(4) |
| H(1W)-O(1)-H(2W)  | 114.7      | C(15)-C(16)-H(16A)  | 120.0    |
| H(3W)-O(2)-H(4W)  | 83(7)      | C(17)-C(16)-H(16A)  | 120.0    |
| N(18)-C(1)-C(17)  | 122.0(4)   | C(16)-C(17)-C(1)    | 118.2(4) |
| N(18)-C(1)-C(2)   | 113.5(4)   | C(16)-C(17)-H(17A)  | 120.9    |
| C(17)-C(1)-C(2)   | 124.5(4)   | C(1)-C(17)-H(17A)   | 120.9    |
| N(3)-C(2)-C(1)    | 116.7(4)   |                     |          |



Table 5. Torsion angles [°] for 2.

|                         |           |                         |           |
|-------------------------|-----------|-------------------------|-----------|
| O(1)-Mn(1)-N(3)-C(2)    | 90.6(3)   | N(6)-Mn(1)-N(18)-C(14)  | -171.8(3) |
| N(18)-Mn(1)-N(3)-C(2)   | 0.3(3)    | N(12)-Mn(1)-N(18)-C(14) | 2.8(3)    |
| N(6)-Mn(1)-N(3)-C(2)    | -174.7(4) | N(3)-Mn(1)-N(18)-C(14)  | -179.6(3) |
| N(12)-Mn(1)-N(3)-C(2)   | 3.6(4)    | N(9)-Mn(1)-N(18)-C(14)  | 10.0(4)   |
| N(9)-Mn(1)-N(3)-C(2)    | 168.8(3)  | I(1)-Mn(1)-N(18)-C(14)  | -87.7(3)  |
| I(1)-Mn(1)-N(3)-C(2)    | -86.0(3)  | O(1)-Mn(1)-N(18)-C(1)   | -88.7(3)  |
| O(1)-Mn(1)-N(3)-C(4)    | -88.1(3)  | N(6)-Mn(1)-N(18)-C(1)   | 6.4(4)    |
| N(18)-Mn(1)-N(3)-C(4)   | -178.5(3) | N(12)-Mn(1)-N(18)-C(1)  | -179.0(3) |
| N(6)-Mn(1)-N(3)-C(4)    | 6.6(3)    | N(3)-Mn(1)-N(18)-C(1)   | -1.3(3)   |
| N(12)-Mn(1)-N(3)-C(4)   | -175.2(3) | N(9)-Mn(1)-N(18)-C(1)   | -171.8(3) |
| N(9)-Mn(1)-N(3)-C(4)    | -9.9(4)   | I(1)-Mn(1)-N(18)-C(1)   | 90.5(3)   |
| I(1)-Mn(1)-N(3)-C(4)    | 95.3(3)   | C(14)-N(18)-C(1)-C(17)  | 0.2(6)    |
| O(1)-Mn(1)-N(6)-C(5)    | 53.8(3)   | Mn(1)-N(18)-C(1)-C(17)  | -178.0(3) |
| N(18)-Mn(1)-N(6)-C(5)   | -39.8(4)  | C(14)-N(18)-C(1)-C(2)   | -179.7(3) |
| N(12)-Mn(1)-N(6)-C(5)   | 149.9(3)  | Mn(1)-N(18)-C(1)-C(2)   | 2.1(4)    |
| N(3)-Mn(1)-N(6)-C(5)    | -32.2(3)  | C(4)-N(3)-C(2)-C(1)     | 179.3(4)  |
| N(9)-Mn(1)-N(6)-C(5)    | 139.0(3)  | Mn(1)-N(3)-C(2)-C(1)    | 0.6(5)    |
| I(1)-Mn(1)-N(6)-C(5)    | -123.2(3) | N(18)-C(1)-C(2)-N(3)    | -1.7(5)   |
| O(1)-Mn(1)-N(6)-C(7)    | -73.2(3)  | C(17)-C(1)-C(2)-N(3)    | 178.3(4)  |
| N(18)-Mn(1)-N(6)-C(7)   | -166.7(3) | C(2)-N(3)-C(4)-C(5)     | -159.5(4) |
| N(12)-Mn(1)-N(6)-C(7)   | 23.0(5)   | Mn(1)-N(3)-C(4)-C(5)    | 19.2(5)   |
| N(3)-Mn(1)-N(6)-C(7)    | -159.2(3) | C(7)-N(6)-C(5)-C(4)     | 177.5(4)  |
| N(9)-Mn(1)-N(6)-C(7)    | 12.1(3)   | Mn(1)-N(6)-C(5)-C(4)    | 54.1(4)   |
| I(1)-Mn(1)-N(6)-C(7)    | 109.9(3)  | N(3)-C(4)-C(5)-N(6)     | -47.8(5)  |
| O(1)-Mn(1)-N(9)-C(10)   | -120.0(3) | C(5)-N(6)-C(7)-C(8)     | -164.3(4) |
| N(18)-Mn(1)-N(9)-C(10)  | -35.8(4)  | Mn(1)-N(6)-C(7)-C(8)    | -41.2(5)  |
| N(6)-Mn(1)-N(9)-C(10)   | 145.3(3)  | C(10)-N(9)-C(8)-C(7)    | -169.7(4) |
| N(12)-Mn(1)-N(9)-C(10)  | -28.7(3)  | Mn(1)-N(9)-C(8)-C(7)    | -46.8(4)  |
| N(3)-Mn(1)-N(9)-C(10)   | 161.5(3)  | N(6)-C(7)-C(8)-N(9)     | 60.7(5)   |
| I(1)-Mn(1)-N(9)-C(10)   | 58.1(3)   | C(8)-N(9)-C(10)-C(11)   | 172.6(4)  |
| O(1)-Mn(1)-N(9)-C(8)    | 113.5(3)  | Mn(1)-N(9)-C(10)-C(11)  | 51.2(4)   |
| N(18)-Mn(1)-N(9)-C(8)   | -162.3(3) | C(13)-N(12)-C(11)-C(10) | -156.6(4) |
| N(6)-Mn(1)-N(9)-C(8)    | 18.8(3)   | Mn(1)-N(12)-C(11)-C(10) | 23.8(4)   |
| N(12)-Mn(1)-N(9)-C(8)   | -155.2(3) | N(9)-C(10)-C(11)-N(12)  | -48.9(5)  |
| N(3)-Mn(1)-N(9)-C(8)    | 35.0(4)   | C(11)-N(12)-C(13)-C(14) | -177.9(3) |
| I(1)-Mn(1)-N(9)-C(8)    | -68.4(3)  | Mn(1)-N(12)-C(13)-C(14) | 1.8(5)    |
| O(1)-Mn(1)-N(12)-C(13)  | -91.6(3)  | C(1)-N(18)-C(14)-C(15)  | 0.1(6)    |
| N(18)-Mn(1)-N(12)-C(13) | -2.4(3)   | Mn(1)-N(18)-C(14)-C(15) | 178.4(3)  |
| N(6)-Mn(1)-N(12)-C(13)  | 171.2(3)  | C(1)-N(18)-C(14)-C(13)  | 178.9(3)  |
| N(3)-Mn(1)-N(12)-C(13)  | -5.7(4)   | Mn(1)-N(18)-C(14)-C(13) | -2.9(4)   |
| N(9)-Mn(1)-N(12)-C(13)  | -177.6(3) | N(12)-C(13)-C(14)-N(18) | 0.7(5)    |
| I(1)-Mn(1)-N(12)-C(13)  | 84.4(3)   | N(12)-C(13)-C(14)-C(15) | 179.4(4)  |
| O(1)-Mn(1)-N(12)-C(11)  | 88.0(3)   | N(18)-C(14)-C(15)-C(16) | -0.5(6)   |
| N(18)-Mn(1)-N(12)-C(11) | 177.3(3)  | C(13)-C(14)-C(15)-C(16) | -179.1(4) |
| N(6)-Mn(1)-N(12)-C(11)  | -9.1(4)   | C(14)-C(15)-C(16)-C(17) | 0.5(7)    |
| N(3)-Mn(1)-N(12)-C(11)  | 174.0(3)  | C(15)-C(16)-C(17)-C(1)  | -0.2(7)   |
| N(9)-Mn(1)-N(12)-C(11)  | 2.1(3)    | N(18)-C(1)-C(17)-C(16)  | -0.2(6)   |
| I(1)-Mn(1)-N(12)-C(11)  | -95.9(3)  | C(2)-C(1)-C(17)-C(16)   | 179.7(4)  |
| O(1)-Mn(1)-N(18)-C(14)  | 93.1(3)   |                         |           |

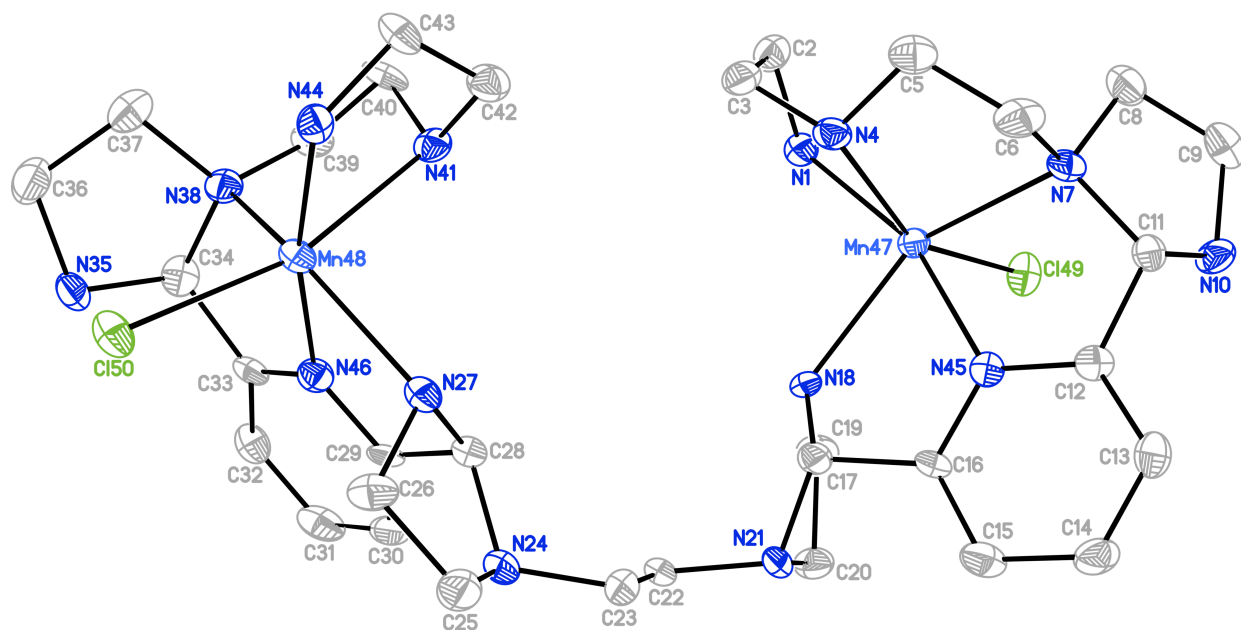

Figure 2. Numbered thermal ellipsoid for 4.

Table 6. Crystal data and structure refinement for 4.

|                                   |                                             |                             |
|-----------------------------------|---------------------------------------------|-----------------------------|
| Identification code               | SH13                                        |                             |
| Empirical formula                 | $C_{32}H_{56}C_{14}Mn_2N_{14}O_{1.50}$      |                             |
| Formula weight                    | 912.59                                      |                             |
| Temperature                       | 100(2) K                                    |                             |
| Wavelength                        | 0.71073 Å                                   |                             |
| Crystal system                    | Monoclinic                                  |                             |
| Space group                       | p2(1)/n                                     |                             |
| Unit cell dimensions              | a = 14.5669(9) Å                            | $\alpha = 90^\circ$ .       |
|                                   | b = 18.4411(10) Å                           | $\beta = 90.728(2)^\circ$ . |
|                                   | c = 15.6178(7) Å                            | $\gamma = 90^\circ$ .       |
| Volume                            | 4195.1(4) Å <sup>3</sup>                    |                             |
| Z                                 | 4                                           |                             |
| Density (calculated)              | 1.445 Mg/m <sup>3</sup>                     |                             |
| Absorption coefficient            | 0.904 mm <sup>-1</sup>                      |                             |
| F(000)                            | 1904                                        |                             |
| Crystal size                      | 0.31 x 0.13 x 0.07 mm <sup>3</sup>          |                             |
| Theta range for data collection   | 1.71 to 25.50°.                             |                             |
| Index ranges                      | -16 ≤ h ≤ 17, -22 ≤ k ≤ 17, -18 ≤ l ≤ 10    |                             |
| Reflections collected             | 20351                                       |                             |
| Independent reflections           | 7788 [R(int) = 0.0803]                      |                             |
| Completeness to theta = 25.50°    | 99.8 %                                      |                             |
| Absorption correction             | Semi-empirical from equivalents             |                             |
| Max. and min. transmission        | 0.9370 and 0.7657                           |                             |
| Refinement method                 | Full-matrix least-squares on F <sup>2</sup> |                             |
| Data / restraints / parameters    | 7788 / 0 / 482                              |                             |
| Goodness-of-fit on F <sup>2</sup> | 0.975                                       |                             |
| Final R indices [I > 2σ(I)]       | R1 = 0.0597, wR2 = 0.1166                   |                             |
| R indices (all data)              | R1 = 0.1170, wR2 = 0.1351                   |                             |
| Largest diff. peak and hole       | 1.008 and -0.767 e.Å <sup>-3</sup>          |                             |

Table 7. Atomic coordinates ( $\times 10^4$ ) and equivalent isotropic displacement parameters ( $\text{\AA}^2 \times 10^3$ ) for 4.  $U(\text{eq})$  is defined as one third of the trace of the orthogonalized  $U^{ij}$  tensor.

|        | x       | y       | z        | $U(\text{eq})$ |
|--------|---------|---------|----------|----------------|
| Mn(47) | 6609(1) | 2135(1) | 10920(1) | 17(1)          |
| Mn(48) | 7714(1) | 3314(1) | 6151(1)  | 19(1)          |
| Cl(49) | 5556(1) | 2154(1) | 12117(1) | 25(1)          |
| Cl(50) | 8463(1) | 4042(1) | 5020(1)  | 25(1)          |
| Cl(51) | 8864(1) | 2785(1) | 9118(1)  | 29(1)          |
| Cl(52) | 5667(1) | 3146(1) | 8456(1)  | 24(1)          |
| N(1)   | 5529(3) | 1752(2) | 9957(2)  | 21(1)          |
| N(4)   | 7443(3) | 1571(2) | 9882(2)  | 20(1)          |
| N(7)   | 7624(3) | 1327(2) | 11711(2) | 20(1)          |
| N(10)  | 7406(3) | 1622(2) | 13147(2) | 25(1)          |
| N(18)  | 6487(3) | 3296(2) | 10425(2) | 19(1)          |
| N(21)  | 7185(3) | 4467(2) | 10512(2) | 20(1)          |
| N(24)  | 8070(3) | 4872(2) | 8307(2)  | 24(1)          |
| N(27)  | 8360(3) | 3891(2) | 7342(2)  | 21(1)          |
| N(35)  | 6286(3) | 4085(2) | 4493(2)  | 27(1)          |
| N(38)  | 6294(3) | 3104(2) | 5420(2)  | 21(1)          |
| N(41)  | 7042(2) | 2404(2) | 6921(2)  | 20(1)          |
| N(44)  | 8697(2) | 2417(2) | 6018(2)  | 19(1)          |
| N(45)  | 7747(2) | 2771(2) | 11560(2) | 17(1)          |
| N(46)  | 6721(3) | 4141(2) | 6545(2)  | 20(1)          |
| C(2)   | 5912(3) | 1159(3) | 9431(3)  | 24(1)          |
| C(3)   | 6852(3) | 1388(3) | 9139(3)  | 26(1)          |
| C(5)   | 7916(3) | 928(3)  | 10233(3) | 26(1)          |
| C(6)   | 8329(3) | 1127(3) | 11088(3) | 29(1)          |
| C(8)   | 7160(4) | 692(3)  | 12089(3) | 32(1)          |
| C(9)   | 7044(4) | 884(3)  | 13044(3) | 31(1)          |
| C(11)  | 8042(3) | 1721(3) | 12447(3) | 20(1)          |
| C(12)  | 8195(3) | 2510(3) | 12253(3) | 19(1)          |
| C(13)  | 8745(3) | 2946(3) | 12760(3) | 31(1)          |
| C(14)  | 8841(4) | 3667(3) | 12554(3) | 32(1)          |
| C(15)  | 8403(3) | 3933(3) | 11829(3) | 26(1)          |
| C(16)  | 7853(3) | 3470(3) | 11350(3) | 17(1)          |
| C(17)  | 7375(3) | 3693(3) | 10521(3) | 19(1)          |
| C(19)  | 5799(3) | 3797(3) | 10807(3) | 27(1)          |
| C(20)  | 6307(3) | 4515(3) | 10964(3) | 25(1)          |
| C(22)  | 7120(3) | 4755(3) | 9631(3)  | 22(1)          |
| C(23)  | 8077(3) | 4788(3) | 9247(3)  | 25(1)          |
| C(25)  | 9015(4) | 4941(3) | 7973(3)  | 31(1)          |
| C(26)  | 9006(3) | 4493(3) | 7162(3)  | 27(1)          |
| C(28)  | 7646(3) | 4250(3) | 7842(3)  | 20(1)          |
| C(29)  | 6873(3) | 4522(3) | 7260(3)  | 20(1)          |
| C(30)  | 6312(3) | 5094(3) | 7488(3)  | 25(1)          |
| C(31)  | 5592(3) | 5282(3) | 6948(3)  | 28(1)          |
| C(32)  | 5435(3) | 4880(3) | 6210(3)  | 24(1)          |
| C(33)  | 6010(3) | 4312(3) | 6034(3)  | 18(1)          |
| C(34)  | 5873(3) | 3820(3) | 5265(3)  | 24(1)          |
| C(36)  | 6311(4) | 3432(3) | 3944(3)  | 34(1)          |
| C(37)  | 6420(3) | 2783(3) | 4550(3)  | 29(1)          |
| C(39)  | 5726(3) | 2655(3) | 5990(3)  | 26(1)          |
| C(40)  | 6299(3) | 2070(3) | 6416(3)  | 24(1)          |
| C(42)  | 7782(3) | 1889(3) | 7177(3)  | 25(1)          |

|       |          |         |         |       |
|-------|----------|---------|---------|-------|
| C(43) | 8395(3)  | 1740(3) | 6429(3) | 24(1) |
| O(1W) | 10242(5) | 4030(4) | 9871(5) | 41(2) |
| O(2W) | 8818(2)  | 1519(2) | 4439(2) | 31(1) |

Table 8. Bond lengths [Å] and angles [°] for 4.

|               |            |              |          |
|---------------|------------|--------------|----------|
| Mn(47)-N(45)  | 2.255(4)   | N(45)-C(16)  | 1.340(6) |
| Mn(47)-N(1)   | 2.275(4)   | N(45)-C(12)  | 1.345(6) |
| Mn(47)-N(18)  | 2.282(4)   | N(46)-C(29)  | 1.335(6) |
| Mn(47)-N(4)   | 2.288(4)   | N(46)-C(33)  | 1.337(6) |
| Mn(47)-N(7)   | 2.425(4)   | C(2)-C(3)    | 1.509(6) |
| Mn(47)-Cl(49) | 2.4349(13) | C(2)-H(2A)   | 0.9900   |
| Mn(48)-N(46)  | 2.195(4)   | C(2)-H(2B)   | 0.9900   |
| Mn(48)-N(44)  | 2.200(4)   | C(3)-H(3A)   | 0.9900   |
| Mn(48)-N(41)  | 2.291(4)   | C(3)-H(3B)   | 0.9900   |
| Mn(48)-N(27)  | 2.330(4)   | C(5)-C(6)    | 1.504(6) |
| Mn(48)-N(38)  | 2.381(4)   | C(5)-H(5A)   | 0.9900   |
| Mn(48)-Cl(50) | 2.4826(14) | C(5)-H(5B)   | 0.9900   |
| N(1)-C(2)     | 1.480(6)   | C(6)-H(6A)   | 0.9900   |
| N(1)-H(1A)    | 0.9200     | C(6)-H(6B)   | 0.9900   |
| N(1)-H(1B)    | 0.9200     | C(8)-C(9)    | 1.543(6) |
| N(4)-C(5)     | 1.473(6)   | C(8)-H(8A)   | 0.9900   |
| N(4)-C(3)     | 1.475(6)   | C(8)-H(8B)   | 0.9900   |
| N(4)-H(4A)    | 0.9300     | C(9)-H(9A)   | 0.9900   |
| N(7)-C(6)     | 1.470(6)   | C(9)-H(9B)   | 0.9900   |
| N(7)-C(8)     | 1.480(6)   | C(11)-C(12)  | 1.503(7) |
| N(7)-C(11)    | 1.484(6)   | C(11)-H(11A) | 1.0000   |
| N(10)-C(11)   | 1.454(6)   | C(12)-C(13)  | 1.379(6) |
| N(10)-C(9)    | 1.468(6)   | C(13)-C(14)  | 1.376(7) |
| N(10)-H(10A)  | 0.8800     | C(13)-H(13A) | 0.9500   |
| N(18)-C(17)   | 1.493(6)   | C(14)-C(15)  | 1.382(6) |
| N(18)-C(19)   | 1.493(6)   | C(14)-H(14A) | 0.9500   |
| N(18)-H(18A)  | 0.9300     | C(15)-C(16)  | 1.383(6) |
| N(21)-C(17)   | 1.455(6)   | C(15)-H(15A) | 0.9500   |
| N(21)-C(20)   | 1.471(6)   | C(16)-C(17)  | 1.519(6) |
| N(21)-C(22)   | 1.478(5)   | C(17)-H(17A) | 1.0000   |
| N(24)-C(23)   | 1.476(5)   | C(19)-C(20)  | 1.536(7) |
| N(24)-C(25)   | 1.484(6)   | C(19)-H(19A) | 0.9900   |
| N(24)-C(28)   | 1.487(6)   | C(19)-H(19B) | 0.9900   |
| N(27)-C(28)   | 1.466(6)   | C(20)-H(20A) | 0.9900   |
| N(27)-C(26)   | 1.485(6)   | C(20)-H(20B) | 0.9900   |
| N(27)-H(27A)  | 0.9300     | C(22)-C(23)  | 1.525(6) |
| N(35)-C(34)   | 1.439(6)   | C(22)-H(22A) | 0.9900   |
| N(35)-C(36)   | 1.479(6)   | C(22)-H(22B) | 0.9900   |
| N(35)-H(35A)  | 0.8800     | C(23)-H(23A) | 0.9900   |
| N(38)-C(34)   | 1.476(6)   | C(23)-H(23B) | 0.9900   |
| N(38)-C(39)   | 1.478(6)   | C(25)-C(26)  | 1.513(6) |
| N(38)-C(37)   | 1.494(6)   | C(25)-H(25A) | 0.9900   |
| N(41)-C(40)   | 1.467(6)   | C(25)-H(25B) | 0.9900   |
| N(41)-C(42)   | 1.487(6)   | C(26)-H(26A) | 0.9900   |
| N(41)-H(41A)  | 0.9300     | C(26)-H(26B) | 0.9900   |
| N(44)-C(43)   | 1.474(6)   | C(28)-C(29)  | 1.523(6) |
| N(44)-H(44A)  | 0.9200     | C(28)-H(28A) | 1.0000   |
| N(44)-H(44B)  | 0.9200     | C(29)-C(30)  | 1.383(6) |

|                     |            |                     |          |
|---------------------|------------|---------------------|----------|
| C(30)-C(31)         | 1.381(7)   | Mn(47)-N(1)-H(1A)   | 109.8    |
| C(30)-H(30A)        | 0.9500     | C(2)-N(1)-H(1B)     | 109.8    |
| C(31)-C(32)         | 1.386(7)   | Mn(47)-N(1)-H(1B)   | 109.8    |
| C(31)-H(31A)        | 0.9500     | H(1A)-N(1)-H(1B)    | 108.2    |
| C(32)-C(33)         | 1.372(6)   | C(5)-N(4)-C(3)      | 112.0(4) |
| C(32)-H(32A)        | 0.9500     | C(5)-N(4)-Mn(47)    | 110.6(3) |
| C(33)-C(34)         | 1.517(6)   | C(3)-N(4)-Mn(47)    | 110.6(3) |
| C(34)-H(34A)        | 1.0000     | C(5)-N(4)-H(4A)     | 107.8    |
| C(36)-C(37)         | 1.534(7)   | C(3)-N(4)-H(4A)     | 107.8    |
| C(36)-H(36A)        | 0.9900     | Mn(47)-N(4)-H(4A)   | 107.8    |
| C(36)-H(36B)        | 0.9900     | C(6)-N(7)-C(8)      | 113.1(4) |
| C(37)-H(37A)        | 0.9900     | C(6)-N(7)-C(11)     | 110.6(4) |
| C(37)-H(37B)        | 0.9900     | C(8)-N(7)-C(11)     | 105.2(4) |
| C(39)-C(40)         | 1.513(6)   | C(6)-N(7)-Mn(47)    | 104.1(3) |
| C(39)-H(39A)        | 0.9900     | C(8)-N(7)-Mn(47)    | 114.3(3) |
| C(39)-H(39B)        | 0.9900     | C(11)-N(7)-Mn(47)   | 109.6(3) |
| C(40)-H(40A)        | 0.9900     | C(11)-N(10)-C(9)    | 105.4(4) |
| C(40)-H(40B)        | 0.9900     | C(11)-N(10)-H(10A)  | 127.3    |
| C(42)-C(43)         | 1.505(6)   | C(9)-N(10)-H(10A)   | 127.3    |
| C(42)-H(42A)        | 0.9900     | C(17)-N(18)-C(19)   | 104.0(4) |
| C(42)-H(42B)        | 0.9900     | C(17)-N(18)-Mn(47)  | 111.2(3) |
| C(43)-H(43A)        | 0.9900     | C(19)-N(18)-Mn(47)  | 119.7(3) |
| C(43)-H(43B)        | 0.9900     | C(17)-N(18)-H(18A)  | 107.1    |
|                     |            | C(19)-N(18)-H(18A)  | 107.1    |
| N(45)-Mn(47)-N(1)   | 162.43(14) | Mn(47)-N(18)-H(18A) | 107.1    |
| N(45)-Mn(47)-N(18)  | 73.49(14)  | C(17)-N(21)-C(20)   | 102.8(4) |
| N(1)-Mn(47)-N(18)   | 90.99(14)  | C(17)-N(21)-C(22)   | 111.8(4) |
| N(45)-Mn(47)-N(4)   | 99.02(13)  | C(20)-N(21)-C(22)   | 112.3(4) |
| N(1)-Mn(47)-N(4)    | 76.11(13)  | C(23)-N(24)-C(25)   | 111.3(4) |
| N(18)-Mn(47)-N(4)   | 103.12(14) | C(23)-N(24)-C(28)   | 113.7(4) |
| N(45)-Mn(47)-N(7)   | 69.72(14)  | C(25)-N(24)-C(28)   | 106.0(4) |
| N(1)-Mn(47)-N(7)    | 123.92(14) | C(28)-N(27)-C(26)   | 102.7(4) |
| N(18)-Mn(47)-N(7)   | 142.45(13) | C(28)-N(27)-Mn(48)  | 110.5(3) |
| N(4)-Mn(47)-N(7)    | 75.88(13)  | C(26)-N(27)-Mn(48)  | 116.2(3) |
| N(45)-Mn(47)-Cl(49) | 96.82(9)   | C(28)-N(27)-H(27A)  | 109.1    |
| N(1)-Mn(47)-Cl(49)  | 94.28(10)  | C(26)-N(27)-H(27A)  | 109.1    |
| N(18)-Mn(47)-Cl(49) | 101.47(10) | Mn(48)-N(27)-H(27A) | 109.1    |
| N(4)-Mn(47)-Cl(49)  | 153.68(11) | C(34)-N(35)-C(36)   | 102.9(4) |
| N(7)-Mn(47)-Cl(49)  | 90.21(9)   | C(34)-N(35)-H(35A)  | 128.5    |
| N(46)-Mn(48)-N(44)  | 168.86(14) | C(36)-N(35)-H(35A)  | 128.5    |
| N(46)-Mn(48)-N(41)  | 94.27(14)  | C(34)-N(38)-C(39)   | 111.4(4) |
| N(44)-Mn(48)-N(41)  | 77.40(14)  | C(34)-N(38)-C(37)   | 105.1(4) |
| N(46)-Mn(48)-N(27)  | 73.75(14)  | C(39)-N(38)-C(37)   | 113.7(4) |
| N(44)-Mn(48)-N(27)  | 99.34(14)  | C(34)-N(38)-Mn(48)  | 106.8(3) |
| N(41)-Mn(48)-N(27)  | 94.97(13)  | C(39)-N(38)-Mn(48)  | 107.0(3) |
| N(46)-Mn(48)-N(38)  | 71.13(14)  | C(37)-N(38)-Mn(48)  | 112.6(3) |
| N(44)-Mn(48)-N(38)  | 113.20(14) | C(40)-N(41)-C(42)   | 113.8(4) |
| N(41)-Mn(48)-N(38)  | 76.01(13)  | C(40)-N(41)-Mn(48)  | 110.0(3) |
| N(27)-Mn(48)-N(38)  | 142.82(13) | C(42)-N(41)-Mn(48)  | 107.2(3) |
| N(46)-Mn(48)-Cl(50) | 96.95(10)  | C(40)-N(41)-H(41A)  | 108.6    |
| N(44)-Mn(48)-Cl(50) | 92.66(10)  | C(42)-N(41)-H(41A)  | 108.6    |
| N(41)-Mn(48)-Cl(50) | 164.59(11) | Mn(48)-N(41)-H(41A) | 108.6    |
| N(27)-Mn(48)-Cl(50) | 98.29(10)  | C(43)-N(44)-Mn(48)  | 113.4(3) |
| N(38)-Mn(48)-Cl(50) | 97.68(10)  | C(43)-N(44)-H(44A)  | 108.9    |
| C(2)-N(1)-Mn(47)    | 109.4(3)   | Mn(48)-N(44)-H(44A) | 108.9    |
| C(2)-N(1)-H(1A)     | 109.8      | C(43)-N(44)-H(44B)  | 108.9    |

|                     |          |                     |          |
|---------------------|----------|---------------------|----------|
| Mn(48)-N(44)-H(44B) | 108.9    | C(13)-C(14)-C(15)   | 119.2(5) |
| H(44A)-N(44)-H(44B) | 107.7    | C(13)-C(14)-H(14A)  | 120.4    |
| C(16)-N(45)-C(12)   | 119.0(4) | C(15)-C(14)-H(14A)  | 120.4    |
| C(16)-N(45)-Mn(47)  | 118.6(3) | C(14)-C(15)-C(16)   | 118.8(5) |
| C(12)-N(45)-Mn(47)  | 121.1(3) | C(14)-C(15)-H(15A)  | 120.6    |
| C(29)-N(46)-C(33)   | 119.6(4) | C(16)-C(15)-H(15A)  | 120.6    |
| C(29)-N(46)-Mn(48)  | 119.8(3) | N(45)-C(16)-C(15)   | 122.0(4) |
| C(33)-N(46)-Mn(48)  | 120.3(3) | N(45)-C(16)-C(17)   | 114.6(4) |
| N(1)-C(2)-C(3)      | 108.2(4) | C(15)-C(16)-C(17)   | 123.3(4) |
| N(1)-C(2)-H(2A)     | 110.1    | N(21)-C(17)-N(18)   | 108.3(4) |
| C(3)-C(2)-H(2A)     | 110.1    | N(21)-C(17)-C(16)   | 111.0(4) |
| N(1)-C(2)-H(2B)     | 110.1    | N(18)-C(17)-C(16)   | 109.9(4) |
| C(3)-C(2)-H(2B)     | 110.1    | N(21)-C(17)-H(17A)  | 109.2    |
| H(2A)-C(2)-H(2B)    | 108.4    | N(18)-C(17)-H(17A)  | 109.2    |
| N(4)-C(3)-C(2)      | 110.4(4) | C(16)-C(17)-H(17A)  | 109.2    |
| N(4)-C(3)-H(3A)     | 109.6    | N(18)-C(19)-C(20)   | 105.8(4) |
| C(2)-C(3)-H(3A)     | 109.6    | N(18)-C(19)-H(19A)  | 110.6    |
| N(4)-C(3)-H(3B)     | 109.6    | C(20)-C(19)-H(19A)  | 110.6    |
| C(2)-C(3)-H(3B)     | 109.6    | N(18)-C(19)-H(19B)  | 110.6    |
| H(3A)-C(3)-H(3B)    | 108.1    | C(20)-C(19)-H(19B)  | 110.6    |
| N(4)-C(5)-C(6)      | 108.2(4) | H(19A)-C(19)-H(19B) | 108.7    |
| N(4)-C(5)-H(5A)     | 110.0    | N(21)-C(20)-C(19)   | 107.0(4) |
| C(6)-C(5)-H(5A)     | 110.0    | N(21)-C(20)-H(20A)  | 110.3    |
| N(4)-C(5)-H(5B)     | 110.0    | C(19)-C(20)-H(20A)  | 110.3    |
| C(6)-C(5)-H(5B)     | 110.0    | N(21)-C(20)-H(20B)  | 110.3    |
| H(5A)-C(5)-H(5B)    | 108.4    | C(19)-C(20)-H(20B)  | 110.3    |
| N(7)-C(6)-C(5)      | 112.0(4) | H(20A)-C(20)-H(20B) | 108.6    |
| N(7)-C(6)-H(6A)     | 109.2    | N(21)-C(22)-C(23)   | 109.4(4) |
| C(5)-C(6)-H(6A)     | 109.2    | N(21)-C(22)-H(22A)  | 109.8    |
| N(7)-C(6)-H(6B)     | 109.2    | C(23)-C(22)-H(22A)  | 109.8    |
| C(5)-C(6)-H(6B)     | 109.2    | N(21)-C(22)-H(22B)  | 109.8    |
| H(6A)-C(6)-H(6B)    | 107.9    | C(23)-C(22)-H(22B)  | 109.8    |
| N(7)-C(8)-C(9)      | 105.1(4) | H(22A)-C(22)-H(22B) | 108.2    |
| N(7)-C(8)-H(8A)     | 110.7    | N(24)-C(23)-C(22)   | 113.6(4) |
| C(9)-C(8)-H(8A)     | 110.7    | N(24)-C(23)-H(23A)  | 108.8    |
| N(7)-C(8)-H(8B)     | 110.7    | C(22)-C(23)-H(23A)  | 108.8    |
| C(9)-C(8)-H(8B)     | 110.7    | N(24)-C(23)-H(23B)  | 108.8    |
| H(8A)-C(8)-H(8B)    | 108.8    | C(22)-C(23)-H(23B)  | 108.8    |
| N(10)-C(9)-C(8)     | 105.9(4) | H(23A)-C(23)-H(23B) | 107.7    |
| N(10)-C(9)-H(9A)    | 110.5    | N(24)-C(25)-C(26)   | 104.4(4) |
| C(8)-C(9)-H(9A)     | 110.5    | N(24)-C(25)-H(25A)  | 110.9    |
| N(10)-C(9)-H(9B)    | 110.5    | C(26)-C(25)-H(25A)  | 110.9    |
| C(8)-C(9)-H(9B)     | 110.5    | N(24)-C(25)-H(25B)  | 110.9    |
| H(9A)-C(9)-H(9B)    | 108.7    | C(26)-C(25)-H(25B)  | 110.9    |
| N(10)-C(11)-N(7)    | 105.2(4) | H(25A)-C(25)-H(25B) | 108.9    |
| N(10)-C(11)-C(12)   | 111.7(4) | N(27)-C(26)-C(25)   | 104.4(4) |
| N(7)-C(11)-C(12)    | 112.2(4) | N(27)-C(26)-H(26A)  | 110.9    |
| N(10)-C(11)-H(11A)  | 109.2    | C(25)-C(26)-H(26A)  | 110.9    |
| N(7)-C(11)-H(11A)   | 109.2    | N(27)-C(26)-H(26B)  | 110.9    |
| C(12)-C(11)-H(11A)  | 109.2    | C(25)-C(26)-H(26B)  | 110.9    |
| N(45)-C(12)-C(13)   | 121.7(5) | H(26A)-C(26)-H(26B) | 108.9    |
| N(45)-C(12)-C(11)   | 115.9(4) | N(27)-C(28)-N(24)   | 108.4(4) |
| C(13)-C(12)-C(11)   | 122.4(4) | N(27)-C(28)-C(29)   | 110.8(4) |
| C(14)-C(13)-C(12)   | 119.3(5) | N(24)-C(28)-C(29)   | 109.7(4) |
| C(14)-C(13)-H(13A)  | 120.3    | N(27)-C(28)-H(28A)  | 109.3    |
| C(12)-C(13)-H(13A)  | 120.3    | N(24)-C(28)-H(28A)  | 109.3    |

|                     |          |                     |          |
|---------------------|----------|---------------------|----------|
| C(29)-C(28)-H(28A)  | 109.3    | N(38)-C(37)-H(37A)  | 111.0    |
| N(46)-C(29)-C(30)   | 121.5(5) | C(36)-C(37)-H(37A)  | 111.0    |
| N(46)-C(29)-C(28)   | 116.1(4) | N(38)-C(37)-H(37B)  | 111.0    |
| C(30)-C(29)-C(28)   | 122.2(4) | C(36)-C(37)-H(37B)  | 111.0    |
| C(31)-C(30)-C(29)   | 118.8(5) | H(37A)-C(37)-H(37B) | 109.0    |
| C(31)-C(30)-H(30A)  | 120.6    | N(38)-C(39)-C(40)   | 110.7(4) |
| C(29)-C(30)-H(30A)  | 120.6    | N(38)-C(39)-H(39A)  | 109.5    |
| C(30)-C(31)-C(32)   | 119.3(5) | C(40)-C(39)-H(39A)  | 109.5    |
| C(30)-C(31)-H(31A)  | 120.4    | N(38)-C(39)-H(39B)  | 109.5    |
| C(32)-C(31)-H(31A)  | 120.4    | C(40)-C(39)-H(39B)  | 109.5    |
| C(33)-C(32)-C(31)   | 118.7(5) | H(39A)-C(39)-H(39B) | 108.1    |
| C(33)-C(32)-H(32A)  | 120.7    | N(41)-C(40)-C(39)   | 109.6(4) |
| C(31)-C(32)-H(32A)  | 120.7    | N(41)-C(40)-H(40A)  | 109.7    |
| N(46)-C(33)-C(32)   | 122.1(4) | C(39)-C(40)-H(40A)  | 109.7    |
| N(46)-C(33)-C(34)   | 115.1(4) | N(41)-C(40)-H(40B)  | 109.7    |
| C(32)-C(33)-C(34)   | 122.8(4) | C(39)-C(40)-H(40B)  | 109.7    |
| N(35)-C(34)-N(38)   | 105.3(4) | H(40A)-C(40)-H(40B) | 108.2    |
| N(35)-C(34)-C(33)   | 114.1(4) | N(41)-C(42)-C(43)   | 110.1(4) |
| N(38)-C(34)-C(33)   | 110.8(4) | N(41)-C(42)-H(42A)  | 109.6    |
| N(35)-C(34)-H(34A)  | 108.8    | C(43)-C(42)-H(42A)  | 109.6    |
| N(38)-C(34)-H(34A)  | 108.8    | N(41)-C(42)-H(42B)  | 109.6    |
| C(33)-C(34)-H(34A)  | 108.8    | C(43)-C(42)-H(42B)  | 109.6    |
| N(35)-C(36)-C(37)   | 106.2(4) | H(42A)-C(42)-H(42B) | 108.1    |
| N(35)-C(36)-H(36A)  | 110.5    | N(44)-C(43)-C(42)   | 111.5(4) |
| C(37)-C(36)-H(36A)  | 110.5    | N(44)-C(43)-H(43A)  | 109.3    |
| N(35)-C(36)-H(36B)  | 110.5    | C(42)-C(43)-H(43A)  | 109.3    |
| C(37)-C(36)-H(36B)  | 110.5    | N(44)-C(43)-H(43B)  | 109.3    |
| H(36A)-C(36)-H(36B) | 108.7    | C(42)-C(43)-H(43B)  | 109.3    |
| N(38)-C(37)-C(36)   | 103.8(4) | H(43A)-C(43)-H(43B) | 108.0    |

Table 9. Anisotropic displacement parameters ( $\text{\AA}^2 \times 10^3$ ) for **4**. The anisotropic displacement factor exponent takes the form:  $-2\pi^2 [h^2 a^{*2} U^{11} + \dots + 2 h k a^* b^* U^{12}]$

|        | $U^{11}$ | $U^{22}$ | $U^{33}$ | $U^{23}$ | $U^{13}$ | $U^{12}$ |
|--------|----------|----------|----------|----------|----------|----------|
| Mn(47) | 18(1)    | 15(1)    | 17(1)    | -1(1)    | -1(1)    | 0(1)     |
| Mn(48) | 19(1)    | 15(1)    | 22(1)    | 2(1)     | 0(1)     | 2(1)     |
| Cl(49) | 19(1)    | 35(1)    | 21(1)    | 2(1)     | 1(1)     | 4(1)     |
| Cl(50) | 23(1)    | 24(1)    | 29(1)    | 8(1)     | 4(1)     | 4(1)     |
| Cl(51) | 25(1)    | 31(1)    | 29(1)    | 2(1)     | 3(1)     | -1(1)    |
| Cl(52) | 23(1)    | 26(1)    | 21(1)    | -1(1)    | -1(1)    | -2(1)    |
| N(1)   | 23(2)    | 20(3)    | 21(2)    | -1(2)    | -2(2)    | 0(2)     |
| N(4)   | 22(2)    | 16(2)    | 23(2)    | 0(2)     | 2(2)     | -4(2)    |
| N(7)   | 19(2)    | 15(2)    | 25(2)    | -1(2)    | 0(2)     | 3(2)     |
| N(10)  | 36(2)    | 23(3)    | 17(2)    | -5(2)    | 6(2)     | -4(2)    |
| N(18)  | 27(2)    | 13(2)    | 17(2)    | -3(2)    | -6(2)    | -2(2)    |
| N(21)  | 30(2)    | 13(2)    | 17(2)    | 2(2)     | 0(2)     | 2(2)     |
| N(24)  | 31(2)    | 19(3)    | 21(2)    | 3(2)     | -1(2)    | -9(2)    |
| N(27)  | 26(2)    | 16(3)    | 22(2)    | 3(2)     | -2(2)    | 1(2)     |
| N(35)  | 37(3)    | 19(3)    | 24(2)    | 7(2)     | 5(2)     | 3(2)     |
| N(38)  | 22(2)    | 19(3)    | 23(2)    | -2(2)    | 1(2)     | 6(2)     |
| N(41)  | 21(2)    | 19(3)    | 20(2)    | -4(2)    | 6(2)     | 2(2)     |
| N(44)  | 17(2)    | 21(3)    | 18(2)    | 1(2)     | -3(2)    | -3(2)    |

|       |       |       |       |       |        |        |
|-------|-------|-------|-------|-------|--------|--------|
| N(45) | 14(2) | 18(3) | 18(2) | -1(2) | 2(2)   | 3(2)   |
| N(46) | 18(2) | 19(3) | 22(2) | 1(2)  | 0(2)   | -2(2)  |
| C(2)  | 23(3) | 26(3) | 22(3) | -3(2) | -3(2)  | 1(2)   |
| C(3)  | 35(3) | 21(3) | 21(3) | -4(2) | 5(2)   | -3(2)  |
| C(5)  | 22(3) | 23(3) | 35(3) | -4(2) | 2(2)   | 4(2)   |
| C(6)  | 22(3) | 25(3) | 39(3) | -9(3) | -3(3)  | 11(2)  |
| C(8)  | 40(3) | 22(3) | 33(3) | 6(3)  | -8(3)  | -4(3)  |
| C(9)  | 30(3) | 28(4) | 34(3) | 11(3) | 0(3)   | 0(3)   |
| C(11) | 19(3) | 19(3) | 22(3) | 1(2)  | -6(2)  | 4(2)   |
| C(12) | 14(2) | 19(3) | 25(3) | -2(2) | -1(2)  | 1(2)   |
| C(13) | 31(3) | 31(4) | 30(3) | 3(3)  | -17(3) | 2(3)   |
| C(14) | 33(3) | 22(3) | 40(3) | -5(3) | -20(3) | 1(3)   |
| C(15) | 25(3) | 18(3) | 37(3) | 2(2)  | -2(2)  | -3(2)  |
| C(16) | 19(2) | 10(3) | 23(3) | 0(2)  | 1(2)   | 1(2)   |
| C(17) | 22(3) | 17(3) | 18(2) | 1(2)  | 4(2)   | -5(2)  |
| C(19) | 24(3) | 22(3) | 35(3) | -3(2) | -4(2)  | 2(2)   |
| C(20) | 30(3) | 18(3) | 27(3) | -5(2) | -1(2)  | 2(2)   |
| C(22) | 36(3) | 12(3) | 19(3) | 3(2)  | -4(2)  | -4(2)  |
| C(23) | 34(3) | 22(3) | 18(3) | 0(2)  | -4(2)  | -6(2)  |
| C(25) | 37(3) | 30(4) | 26(3) | -2(3) | 3(3)   | -14(3) |
| C(26) | 25(3) | 21(3) | 34(3) | -5(2) | 1(2)   | -5(2)  |
| C(28) | 27(3) | 13(3) | 20(3) | 1(2)  | 0(2)   | 0(2)   |
| C(29) | 28(3) | 9(3)  | 24(3) | -1(2) | 3(2)   | -8(2)  |
| C(30) | 32(3) | 15(3) | 29(3) | -3(2) | 5(2)   | -4(2)  |
| C(31) | 23(3) | 16(3) | 45(3) | 1(3)  | 14(3)  | 5(2)   |
| C(32) | 21(3) | 24(3) | 26(3) | 6(2)  | 2(2)   | 2(2)   |
| C(33) | 18(2) | 11(3) | 25(3) | 3(2)  | 5(2)   | -1(2)  |
| C(34) | 20(3) | 28(3) | 24(3) | 1(2)  | 0(2)   | 4(2)   |
| C(36) | 41(3) | 37(4) | 22(3) | -3(3) | 0(3)   | 8(3)   |
| C(37) | 25(3) | 35(4) | 27(3) | -9(3) | -3(2)  | 4(3)   |
| C(39) | 24(3) | 21(3) | 32(3) | -1(2) | 3(2)   | -1(2)  |
| C(40) | 24(3) | 10(3) | 40(3) | 5(2)  | 3(2)   | -3(2)  |
| C(42) | 27(3) | 20(3) | 28(3) | 0(2)  | 3(2)   | 4(2)   |
| C(43) | 24(3) | 17(3) | 32(3) | 9(2)  | 2(2)   | 3(2)   |
| O(2W) | 34(2) | 35(2) | 22(2) | 2(2)  | -3(2)  | -3(2)  |

Table 10. Hydrogen coordinates ( $\times 10^4$ ) and isotropic displacement parameters ( $\text{\AA}^2 \times 10^3$ ) for **4**.

|        | x    | y    | z     | U(eq) |
|--------|------|------|-------|-------|
| H(1A)  | 5019 | 1589 | 10241 | 25    |
| H(1B)  | 5353 | 2131 | 9609  | 25    |
| H(4A)  | 7889 | 1894 | 9698  | 24    |
| H(10A) | 7267 | 1938 | 13547 | 30    |
| H(18A) | 6354 | 3268 | 9842  | 23    |
| H(27A) | 8655 | 3548 | 7684  | 25    |
| H(35A) | 6477 | 4526 | 4377  | 32    |
| H(41A) | 6793 | 2603 | 7414  | 24    |
| H(44A) | 8786 | 2331 | 5445  | 23    |
| H(44B) | 9251 | 2555 | 6255  | 23    |
| H(2A)  | 5507 | 1065 | 8930  | 28    |
| H(2B)  | 5958 | 709  | 9774  | 28    |



|        |      |      |       |    |
|--------|------|------|-------|----|
| H(3A)  | 7135 | 990  | 8810  | 31 |
| H(3B)  | 6795 | 1815 | 8758  | 31 |
| H(5A)  | 8403 | 769  | 9839  | 32 |
| H(5B)  | 7474 | 524  | 10300 | 32 |
| H(6A)  | 8687 | 711  | 11313 | 35 |
| H(6B)  | 8756 | 1540 | 11014 | 35 |
| H(8A)  | 7539 | 250  | 12026 | 38 |
| H(8B)  | 6555 | 609  | 11809 | 38 |
| H(9A)  | 6388 | 865  | 13202 | 37 |
| H(9B)  | 7391 | 540  | 13411 | 37 |
| H(11A) | 8643 | 1491 | 12602 | 24 |
| H(13A) | 9055 | 2751 | 13246 | 37 |
| H(14A) | 9204 | 3979 | 12905 | 38 |
| H(15A) | 8478 | 4425 | 11662 | 32 |
| H(17A) | 7778 | 3570 | 10028 | 23 |
| H(19A) | 5568 | 3598 | 11352 | 32 |
| H(19B) | 5273 | 3870 | 10409 | 32 |
| H(20A) | 5939 | 4927 | 10741 | 30 |
| H(20B) | 6417 | 4589 | 11585 | 30 |
| H(22A) | 6847 | 5247 | 9639  | 27 |
| H(22B) | 6719 | 4439 | 9276  | 27 |
| H(23A) | 8416 | 5200 | 9506  | 30 |
| H(23B) | 8411 | 4338 | 9399  | 30 |
| H(25A) | 9472 | 4750 | 8391  | 37 |
| H(25B) | 9163 | 5454 | 7848  | 37 |
| H(26A) | 8789 | 4784 | 6667  | 32 |
| H(26B) | 9627 | 4304 | 7039  | 32 |
| H(28A) | 7392 | 3899 | 8265  | 24 |
| H(30A) | 6420 | 5352 | 8005  | 30 |
| H(31A) | 5209 | 5682 | 7081  | 34 |
| H(32A) | 4939 | 4997 | 5834  | 29 |
| H(34A) | 5200 | 3754 | 5159  | 29 |
| H(36A) | 6834 | 3458 | 3546  | 40 |
| H(36B) | 5736 | 3389 | 3603  | 40 |
| H(37A) | 5948 | 2409 | 4428  | 35 |
| H(37B) | 7036 | 2562 | 4499  | 35 |
| H(39A) | 5221 | 2429 | 5654  | 31 |
| H(39B) | 5449 | 2967 | 6434  | 31 |
| H(40A) | 5908 | 1773 | 6793  | 29 |
| H(40B) | 6561 | 1748 | 5975  | 29 |
| H(42A) | 7507 | 1430 | 7377  | 30 |
| H(42B) | 8149 | 2098 | 7654  | 30 |
| H(43A) | 8940 | 1464 | 6629  | 29 |
| H(43B) | 8060 | 1438 | 6004  | 29 |

---

Table 11. Torsion angles [°] for 4.

|                           |           |                           |           |
|---------------------------|-----------|---------------------------|-----------|
| N(45)-Mn(47)-N(1)-C(2)    | 96.5(5)   | Cl(50)-Mn(48)-N(38)-C(34) | -61.4(3)  |
| N(18)-Mn(47)-N(1)-C(2)    | 124.0(3)  | N(46)-Mn(48)-N(38)-C(39)  | -86.1(3)  |
| N(4)-Mn(47)-N(1)-C(2)     | 20.8(3)   | N(44)-Mn(48)-N(38)-C(39)  | 82.9(3)   |
| N(7)-Mn(47)-N(1)-C(2)     | -41.3(3)  | N(41)-Mn(48)-N(38)-C(39)  | 13.5(3)   |
| Cl(49)-Mn(47)-N(1)-C(2)   | -134.4(3) | N(27)-Mn(48)-N(38)-C(39)  | -66.1(4)  |
| N(45)-Mn(47)-N(4)-C(5)    | 81.3(3)   | Cl(50)-Mn(48)-N(38)-C(39) | 179.2(3)  |
| N(1)-Mn(47)-N(4)-C(5)     | -115.9(3) | N(46)-Mn(48)-N(38)-C(37)  | 148.3(3)  |
| N(18)-Mn(47)-N(4)-C(5)    | 156.4(3)  | N(44)-Mn(48)-N(38)-C(37)  | -42.7(3)  |
| N(7)-Mn(47)-N(4)-C(5)     | 15.0(3)   | N(41)-Mn(48)-N(38)-C(37)  | -112.2(3) |
| Cl(49)-Mn(47)-N(4)-C(5)   | -45.0(4)  | N(27)-Mn(48)-N(38)-C(37)  | 168.3(3)  |
| N(45)-Mn(47)-N(4)-C(3)    | -154.0(3) | Cl(50)-Mn(48)-N(38)-C(37) | 53.5(3)   |
| N(1)-Mn(47)-N(4)-C(3)     | 8.8(3)    | N(46)-Mn(48)-N(41)-C(40)  | 85.9(3)   |
| N(18)-Mn(47)-N(4)-C(3)    | -79.0(3)  | N(44)-Mn(48)-N(41)-C(40)  | -101.6(3) |
| N(7)-Mn(47)-N(4)-C(3)     | 139.7(3)  | N(27)-Mn(48)-N(41)-C(40)  | 159.9(3)  |
| Cl(49)-Mn(47)-N(4)-C(3)   | 79.7(4)   | N(38)-Mn(48)-N(41)-C(40)  | 16.5(3)   |
| N(45)-Mn(47)-N(7)-C(6)    | -89.5(3)  | Cl(50)-Mn(48)-N(41)-C(40) | -50.8(5)  |
| N(1)-Mn(47)-N(7)-C(6)     | 78.0(3)   | N(46)-Mn(48)-N(41)-C(42)  | -149.9(3) |
| N(18)-Mn(47)-N(7)-C(6)    | -77.4(3)  | N(44)-Mn(48)-N(41)-C(42)  | 22.6(3)   |
| N(4)-Mn(47)-N(7)-C(6)     | 15.8(3)   | N(27)-Mn(48)-N(41)-C(42)  | -75.9(3)  |
| Cl(49)-Mn(47)-N(7)-C(6)   | 173.3(3)  | N(38)-Mn(48)-N(41)-C(42)  | 140.8(3)  |
| N(45)-Mn(47)-N(7)-C(8)    | 146.7(3)  | Cl(50)-Mn(48)-N(41)-C(42) | 73.4(5)   |
| N(1)-Mn(47)-N(7)-C(8)     | -45.8(4)  | N(46)-Mn(48)-N(44)-C(43)  | 45.2(9)   |
| N(18)-Mn(47)-N(7)-C(8)    | 158.8(3)  | N(41)-Mn(48)-N(44)-C(43)  | 2.9(3)    |
| N(4)-Mn(47)-N(7)-C(8)     | -108.0(3) | N(27)-Mn(48)-N(44)-C(43)  | 96.0(3)   |
| Cl(49)-Mn(47)-N(7)-C(8)   | 49.5(3)   | N(38)-Mn(48)-N(44)-C(43)  | -65.7(3)  |
| N(45)-Mn(47)-N(7)-C(11)   | 28.8(3)   | Cl(50)-Mn(48)-N(44)-C(43) | -165.2(3) |
| N(1)-Mn(47)-N(7)-C(11)    | -163.7(3) | N(1)-Mn(47)-N(45)-C(16)   | 26.0(6)   |
| N(18)-Mn(47)-N(7)-C(11)   | 40.9(4)   | N(18)-Mn(47)-N(45)-C(16)  | -2.8(3)   |
| N(4)-Mn(47)-N(7)-C(11)    | 134.2(3)  | N(4)-Mn(47)-N(45)-C(16)   | 98.3(3)   |
| Cl(49)-Mn(47)-N(7)-C(11)  | -68.4(3)  | N(7)-Mn(47)-N(45)-C(16)   | 169.5(3)  |
| N(45)-Mn(47)-N(18)-C(17)  | 22.1(3)   | Cl(49)-Mn(47)-N(45)-C(16) | -102.8(3) |
| N(1)-Mn(47)-N(18)-C(17)   | -149.6(3) | N(1)-Mn(47)-N(45)-C(12)   | -167.0(4) |
| N(4)-Mn(47)-N(18)-C(17)   | -73.6(3)  | N(18)-Mn(47)-N(45)-C(12)  | 164.2(4)  |
| N(7)-Mn(47)-N(18)-C(17)   | 10.2(4)   | N(4)-Mn(47)-N(45)-C(12)   | -94.7(3)  |
| Cl(49)-Mn(47)-N(18)-C(17) | 115.9(3)  | N(7)-Mn(47)-N(45)-C(12)   | -23.5(3)  |
| N(45)-Mn(47)-N(18)-C(19)  | -99.3(3)  | Cl(49)-Mn(47)-N(45)-C(12) | 64.2(3)   |
| N(1)-Mn(47)-N(18)-C(19)   | 89.0(3)   | N(44)-Mn(48)-N(46)-C(29)  | 47.3(9)   |
| N(4)-Mn(47)-N(18)-C(19)   | 165.0(3)  | N(41)-Mn(48)-N(46)-C(29)  | 88.5(3)   |
| N(7)-Mn(47)-N(18)-C(19)   | -111.2(3) | N(27)-Mn(48)-N(46)-C(29)  | -5.5(3)   |
| Cl(49)-Mn(47)-N(18)-C(19) | -5.5(3)   | N(38)-Mn(48)-N(46)-C(29)  | 162.1(4)  |
| N(46)-Mn(48)-N(27)-C(28)  | 21.1(3)   | Cl(50)-Mn(48)-N(46)-C(29) | -102.1(3) |
| N(44)-Mn(48)-N(27)-C(28)  | -150.0(3) | N(44)-Mn(48)-N(46)-C(33)  | -138.9(7) |
| N(41)-Mn(48)-N(27)-C(28)  | -71.9(3)  | N(41)-Mn(48)-N(46)-C(33)  | -97.7(3)  |
| N(38)-Mn(48)-N(27)-C(28)  | 1.4(4)    | N(27)-Mn(48)-N(46)-C(33)  | 168.3(4)  |
| Cl(50)-Mn(48)-N(27)-C(28) | 115.9(3)  | N(38)-Mn(48)-N(46)-C(33)  | -24.1(3)  |
| N(46)-Mn(48)-N(27)-C(26)  | -95.3(3)  | Cl(50)-Mn(48)-N(46)-C(33) | 71.7(3)   |
| N(44)-Mn(48)-N(27)-C(26)  | 93.7(3)   | Mn(47)-N(1)-C(2)-C(3)     | -46.8(4)  |
| N(41)-Mn(48)-N(27)-C(26)  | 171.7(3)  | C(5)-N(4)-C(3)-C(2)       | 86.9(5)   |
| N(38)-Mn(48)-N(27)-C(26)  | -115.0(3) | Mn(47)-N(4)-C(3)-C(2)     | -36.9(5)  |
| Cl(50)-Mn(48)-N(27)-C(26) | -0.4(3)   | N(1)-C(2)-C(3)-N(4)       | 56.4(5)   |
| N(46)-Mn(48)-N(38)-C(34)  | 33.3(3)   | C(3)-N(4)-C(5)-C(6)       | -167.7(4) |
| N(44)-Mn(48)-N(38)-C(34)  | -157.7(3) | Mn(47)-N(4)-C(5)-C(6)     | -43.9(4)  |
| N(41)-Mn(48)-N(38)-C(34)  | 132.9(3)  | C(8)-N(7)-C(6)-C(5)       | 78.8(5)   |
| N(27)-Mn(48)-N(38)-C(34)  | 53.3(4)   | C(11)-N(7)-C(6)-C(5)      | -163.4(4) |

|                          |           |                          |           |
|--------------------------|-----------|--------------------------|-----------|
| Mn(47)-N(7)-C(6)-C(5)    | -45.7(5)  | C(28)-N(27)-C(26)-C(25)  | 37.6(5)   |
| N(4)-C(5)-C(6)-N(7)      | 63.0(5)   | Mn(48)-N(27)-C(26)-C(25) | 158.2(3)  |
| C(6)-N(7)-C(8)-C(9)      | 140.0(4)  | N(24)-C(25)-C(26)-N(27)  | -33.0(5)  |
| C(11)-N(7)-C(8)-C(9)     | 19.2(5)   | C(26)-N(27)-C(28)-N(24)  | -28.5(5)  |
| Mn(47)-N(7)-C(8)-C(9)    | -101.2(4) | Mn(48)-N(27)-C(28)-N(24) | -153.0(3) |
| C(11)-N(10)-C(9)-C(8)    | -23.6(5)  | C(26)-N(27)-C(28)-C(29)  | 91.9(4)   |
| N(7)-C(8)-C(9)-N(10)     | 2.5(5)    | Mn(48)-N(27)-C(28)-C(29) | -32.6(4)  |
| C(9)-N(10)-C(11)-N(7)    | 36.2(5)   | C(23)-N(24)-C(28)-N(27)  | -114.5(4) |
| C(9)-N(10)-C(11)-C(12)   | 158.1(4)  | C(25)-N(24)-C(28)-N(27)  | 8.2(5)    |
| C(6)-N(7)-C(11)-N(10)    | -156.9(4) | C(23)-N(24)-C(28)-C(29)  | 124.4(4)  |
| C(8)-N(7)-C(11)-N(10)    | -34.5(5)  | C(25)-N(24)-C(28)-C(29)  | -112.9(4) |
| Mn(47)-N(7)-C(11)-N(10)  | 88.8(3)   | C(33)-N(46)-C(29)-C(30)  | -0.1(7)   |
| C(6)-N(7)-C(11)-C(12)    | 81.4(5)   | Mn(48)-N(46)-C(29)-C(30) | 173.7(3)  |
| C(8)-N(7)-C(11)-C(12)    | -156.2(4) | C(33)-N(46)-C(29)-C(28)  | 175.0(4)  |
| Mn(47)-N(7)-C(11)-C(12)  | -32.8(4)  | Mn(48)-N(46)-C(29)-C(28) | -11.2(5)  |
| C(16)-N(45)-C(12)-C(13)  | 1.2(7)    | N(27)-C(28)-C(29)-N(46)  | 29.9(6)   |
| Mn(47)-N(45)-C(12)-C(13) | -165.7(4) | N(24)-C(28)-C(29)-N(46)  | 149.6(4)  |
| C(16)-N(45)-C(12)-C(11)  | -180.0(4) | N(27)-C(28)-C(29)-C(30)  | -155.0(4) |
| Mn(47)-N(45)-C(12)-C(11) | 13.1(5)   | N(24)-C(28)-C(29)-C(30)  | -35.4(6)  |
| N(10)-C(11)-C(12)-N(45)  | -102.5(4) | N(46)-C(29)-C(30)-C(31)  | -1.5(7)   |
| N(7)-C(11)-C(12)-N(45)   | 15.4(6)   | C(28)-C(29)-C(30)-C(31)  | -176.3(4) |
| N(10)-C(11)-C(12)-C(13)  | 76.4(6)   | C(29)-C(30)-C(31)-C(32)  | 2.0(7)    |
| N(7)-C(11)-C(12)-C(13)   | -165.8(4) | C(30)-C(31)-C(32)-C(33)  | -0.8(7)   |
| N(45)-C(12)-C(13)-C(14)  | 0.0(8)    | C(29)-N(46)-C(33)-C(32)  | 1.3(7)    |
| C(11)-C(12)-C(13)-C(14)  | -178.8(5) | Mn(48)-N(46)-C(33)-C(32) | -172.5(3) |
| C(12)-C(13)-C(14)-C(15)  | -1.8(8)   | C(29)-N(46)-C(33)-C(34)  | -176.9(4) |
| C(13)-C(14)-C(15)-C(16)  | 2.4(8)    | Mn(48)-N(46)-C(33)-C(34) | 9.3(5)    |
| C(12)-N(45)-C(16)-C(15)  | -0.6(6)   | C(31)-C(32)-C(33)-N(46)  | -0.8(7)   |
| Mn(47)-N(45)-C(16)-C(15) | 166.7(3)  | C(31)-C(32)-C(33)-C(34)  | 177.3(4)  |
| C(12)-N(45)-C(16)-C(17)  | 175.6(4)  | C(36)-N(35)-C(34)-N(38)  | 41.4(5)   |
| Mn(47)-N(45)-C(16)-C(17) | -17.2(5)  | C(36)-N(35)-C(34)-C(33)  | 163.1(4)  |
| C(14)-C(15)-C(16)-N(45)  | -1.2(7)   | C(39)-N(38)-C(34)-N(35)  | -159.7(4) |
| C(14)-C(15)-C(16)-C(17)  | -177.0(4) | C(37)-N(38)-C(34)-N(35)  | -36.1(5)  |
| C(20)-N(21)-C(17)-N(18)  | 35.9(4)   | Mn(48)-N(38)-C(34)-N(35) | 83.8(3)   |
| C(22)-N(21)-C(17)-N(18)  | -84.9(4)  | C(39)-N(38)-C(34)-C(33)  | 76.5(5)   |
| C(20)-N(21)-C(17)-C(16)  | -84.9(4)  | C(37)-N(38)-C(34)-C(33)  | -159.9(4) |
| C(22)-N(21)-C(17)-C(16)  | 154.4(4)  | Mn(48)-N(38)-C(34)-C(33) | -40.0(4)  |
| C(19)-N(18)-C(17)-N(21)  | -28.5(4)  | N(46)-C(33)-C(34)-N(35)  | -95.4(5)  |
| Mn(47)-N(18)-C(17)-N(21) | -158.7(3) | C(32)-C(33)-C(34)-N(35)  | 86.4(6)   |
| C(19)-N(18)-C(17)-C(16)  | 92.9(4)   | N(46)-C(33)-C(34)-N(38)  | 23.2(6)   |
| Mn(47)-N(18)-C(17)-C(16) | -37.2(4)  | C(32)-C(33)-C(34)-N(38)  | -155.0(4) |
| N(45)-C(16)-C(17)-N(21)  | 156.0(4)  | C(34)-N(35)-C(36)-C(37)  | -30.8(5)  |
| C(15)-C(16)-C(17)-N(21)  | -28.0(6)  | C(34)-N(38)-C(37)-C(36)  | 15.7(5)   |
| N(45)-C(16)-C(17)-N(18)  | 36.1(5)   | C(39)-N(38)-C(37)-C(36)  | 137.8(4)  |
| C(15)-C(16)-C(17)-N(18)  | -147.8(4) | Mn(48)-N(38)-C(37)-C(36) | -100.3(4) |
| C(17)-N(18)-C(19)-C(20)  | 9.5(5)    | N(35)-C(36)-C(37)-N(38)  | 9.0(5)    |
| Mn(47)-N(18)-C(19)-C(20) | 134.4(3)  | C(34)-N(38)-C(39)-C(40)  | -158.0(4) |
| C(17)-N(21)-C(20)-C(19)  | -28.7(5)  | C(37)-N(38)-C(39)-C(40)  | 83.4(5)   |
| C(22)-N(21)-C(20)-C(19)  | 91.7(5)   | Mn(48)-N(38)-C(39)-C(40) | -41.7(4)  |
| N(18)-C(19)-C(20)-N(21)  | 11.9(5)   | C(42)-N(41)-C(40)-C(39)  | -164.8(4) |
| C(17)-N(21)-C(22)-C(23)  | -72.9(5)  | Mn(48)-N(41)-C(40)-C(39) | -44.5(4)  |
| C(20)-N(21)-C(22)-C(23)  | 172.1(4)  | N(38)-C(39)-C(40)-N(41)  | 59.7(5)   |
| C(25)-N(24)-C(23)-C(22)  | 176.9(4)  | C(40)-N(41)-C(42)-C(43)  | 77.1(5)   |
| C(28)-N(24)-C(23)-C(22)  | -63.4(5)  | Mn(48)-N(41)-C(42)-C(43) | -44.8(4)  |
| N(21)-C(22)-C(23)-N(24)  | 164.0(4)  | Mn(48)-N(44)-C(43)-C(42) | -28.4(5)  |
| C(23)-N(24)-C(25)-C(26)  | 139.4(4)  | N(41)-C(42)-C(43)-N(44)  | 49.7(5)   |
| C(28)-N(24)-C(25)-C(26)  | 15.3(5)   |                          |           |

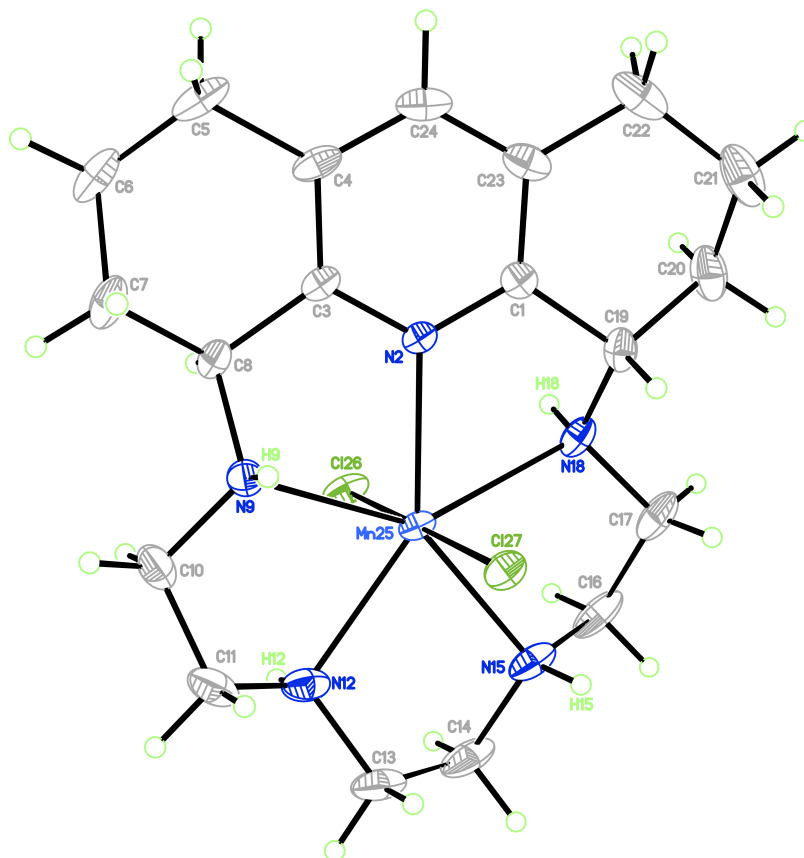

Figure 3. Numbered thermal ellipsoid for **17**.

Table 12. Crystal data and structure refinement for **17**.

|                        |                                            |                            |
|------------------------|--------------------------------------------|----------------------------|
| Identification code    | SH08                                       |                            |
| Empirical formula      | $C_{19.50}H_{31.50}Cl_{3.50}MnN_5O_{0.50}$ |                            |
| Formula weight         | 523.01                                     |                            |
| Temperature            | 100(2) K                                   |                            |
| Wavelength             | 0.71073 Å                                  |                            |
| Crystal system         | Monoclinic                                 |                            |
| Space group            | C2/c                                       |                            |
| Unit cell dimensions   | $a = 33.9815(7)$ Å                         | $a = 90^\circ$ .           |
|                        | $b = 12.1081(3)$ Å                         | $b = 117.0730(10)^\circ$ . |
|                        | $c = 25.8046(5)$ Å                         | $g = 90^\circ$ .           |
| Volume                 | $9454.0(4)$ Å <sup>3</sup>                 |                            |
| Z                      | 16                                         |                            |
| Density (calculated)   | 1.470 Mg/m <sup>3</sup>                    |                            |
| Absorption coefficient | 0.973 mm <sup>-1</sup>                     |                            |

|                                   |                                             |
|-----------------------------------|---------------------------------------------|
| F(000)                            | 4352                                        |
| Crystal size                      | 0.31 x 0.30 x 0.12 mm <sup>3</sup>          |
| Theta range for data collection   | 1.35 to 29.94°.                             |
| Index ranges                      | -47<=h<=47, -16<=k<=17, -36<=l<=34          |
| Reflections collected             | 62351                                       |
| Independent reflections           | 13557 [R(int) = 0.0277]                     |
| Completeness to theta = 29.94°    | 99.0 %                                      |
| Absorption correction             | None                                        |
| Max. and min. transmission        | 0.8880 and 0.7510                           |
| Refinement method                 | Full-matrix least-squares on F <sup>2</sup> |
| Data / restraints / parameters    | 13557 / 0 / 565                             |
| Goodness-of-fit on F <sup>2</sup> | 1.062                                       |
| Final R indices [I>2sigma(I)]     | R1 = 0.0313, wR2 = 0.0804                   |
| R indices (all data)              | R1 = 0.0385, wR2 = 0.0843                   |
| Largest diff. peak and hole       | 0.839 and -0.719 e.Å <sup>-3</sup>          |

Table 13. Atomic coordinates ( x 10<sup>4</sup>) and equivalent isotropic displacement parameters (Å<sup>2</sup>x 10<sup>3</sup>) for **17**. U(eq) is defined as one third of the trace of the orthogonalized U<sup>ij</sup> tensor.

|        | x       | y        | z       | U(eq) |
|--------|---------|----------|---------|-------|
| Mn(25) | 1872(1) | 4118(1)  | 3830(1) | 16(1) |
| Mn(52) | 678(1)  | 10354(1) | 1444(1) | 13(1) |
| Cl(26) | 1679(1) | 4056(1)  | 2752(1) | 24(1) |
| Cl(27) | 2078(1) | 4143(1)  | 4929(1) | 19(1) |
| Cl(53) | 692(1)  | 9792(1)  | 492(1)  | 19(1) |
| Cl(54) | 758(1)  | 11000(1) | 2454(1) | 20(1) |
| N(2)   | 2023(1) | 5958(1)  | 3924(1) | 14(1) |
| N(9)   | 1246(1) | 5122(1)  | 3724(1) | 19(1) |
| N(12)  | 1311(1) | 2841(1)  | 3591(1) | 25(1) |
| N(15)  | 2222(1) | 2445(1)  | 4012(1) | 24(1) |
| N(18)  | 2601(1) | 4473(1)  | 3983(1) | 20(1) |
| N(29)  | 1026(1) | 8731(1)  | 1801(1) | 12(1) |
| N(36)  | 154(1)  | 9001(1)  | 1390(1) | 14(1) |
| N(39)  | -7(1)   | 11114(1) | 876(1)  | 17(1) |

|       |         |          |         |       |
|-------|---------|----------|---------|-------|
| N(42) | 812(1)  | 12231(1) | 1381(1) | 17(1) |
| N(45) | 1447(1) | 10546(1) | 1767(1) | 13(1) |
| C(1)  | 2442(1) | 6308(1)  | 4192(1) | 17(1) |
| C(3)  | 1689(1) | 6685(1)  | 3730(1) | 16(1) |
| C(4)  | 1764(1) | 7826(1)  | 3800(1) | 21(1) |
| C(5)  | 1385(1) | 8638(1)  | 3564(1) | 29(1) |
| C(6)  | 946(1)  | 8102(2)  | 3166(1) | 30(1) |
| C(7)  | 886(1)  | 7006(2)  | 3414(1) | 27(1) |
| C(8)  | 1232(1) | 6178(1)  | 3436(1) | 18(1) |
| C(10) | 845(1)  | 4440(2)  | 3455(1) | 27(1) |
| C(11) | 956(1)  | 3277(2)  | 3705(1) | 30(1) |
| C(13) | 1503(1) | 1786(1)  | 3870(1) | 32(1) |
| C(14) | 1896(1) | 1553(1)  | 3757(1) | 34(1) |
| C(16) | 2571(1) | 2485(1)  | 3827(1) | 31(1) |
| C(17) | 2869(1) | 3459(2)  | 4125(1) | 29(1) |
| C(19) | 2790(1) | 5408(1)  | 4380(1) | 20(1) |
| C(20) | 3225(1) | 5870(2)  | 4436(1) | 30(1) |
| C(21) | 3356(1) | 6885(2)  | 4827(1) | 36(1) |
| C(22) | 3026(1) | 7819(2)  | 4561(1) | 34(1) |
| C(23) | 2550(1) | 7427(1)  | 4287(1) | 22(1) |
| C(24) | 2202(1) | 8172(1)  | 4091(1) | 25(1) |
| C(28) | 1467(1) | 8694(1)  | 2124(1) | 12(1) |
| C(30) | 789(1)  | 7798(1)  | 1649(1) | 13(1) |
| C(31) | 983(1)  | 6764(1)  | 1832(1) | 15(1) |
| C(32) | 712(1)  | 5716(1)  | 1669(1) | 21(1) |
| C(33) | 252(1)  | 5887(1)  | 1162(1) | 22(1) |
| C(34) | 38(1)   | 6926(1)  | 1258(1) | 20(1) |
| C(35) | 298(1)  | 7947(1)  | 1247(1) | 14(1) |
| C(37) | -297(1) | 9341(1)  | 973(1)  | 17(1) |
| C(38) | -343(1) | 10588(1) | 1003(1) | 18(1) |
| C(40) | 13(1)   | 12325(1) | 925(1)  | 22(1) |
| C(41) | 427(1)  | 12724(1) | 895(1)  | 21(1) |
| C(43) | 1236(1) | 12399(1) | 1372(1) | 19(1) |
| C(44) | 1587(1) | 11705(1) | 1853(1) | 17(1) |
| C(46) | 1701(1) | 9801(1)  | 2253(1) | 13(1) |
| C(47) | 2187(1) | 9652(1)  | 2394(1) | 18(1) |

|        |         |          |         |       |
|--------|---------|----------|---------|-------|
| C(48)  | 2404(1) | 8778(1)  | 2867(1) | 19(1) |
| C(49)  | 2190(1) | 7649(1)  | 2656(1) | 18(1) |
| C(50)  | 1691(1) | 7696(1)  | 2320(1) | 14(1) |
| C(51)  | 1440(1) | 6733(1)  | 2173(1) | 16(1) |
| C(1S)  | 6300(1) | -844(1)  | 5426(1) | 24(1) |
| Cl(1S) | 6589(1) | -269(1)  | 6129(1) | 27(1) |
| Cl(2S) | 5880(1) | 80(1)    | 4967(1) | 42(1) |
| Cl(3S) | 6070(1) | -2131(1) | 5458(1) | 26(1) |
| O(1S)  | 0       | 9575(1)  | 2500    | 22(1) |
| O(2S)  | 0       | 2674(2)  | 2500    | 75(1) |

---

Table 14. Bond lengths [Å] and angles [°] for **17**.

|               |            |
|---------------|------------|
| Mn(25)-N(2)   | 2.2753(12) |
| Mn(25)-N(15)  | 2.2872(13) |
| Mn(25)-N(12)  | 2.3095(14) |
| Mn(25)-N(9)   | 2.3572(13) |
| Mn(25)-N(18)  | 2.3649(13) |
| Mn(25)-Cl(26) | 2.5523(4)  |
| Mn(25)-Cl(27) | 2.5949(4)  |
| Mn(52)-N(29)  | 2.2627(11) |
| Mn(52)-N(39)  | 2.3037(12) |
| Mn(52)-N(42)  | 2.3374(12) |
| Mn(52)-N(45)  | 2.3635(11) |
| Mn(52)-N(36)  | 2.3761(12) |
| Mn(52)-Cl(53) | 2.5684(4)  |
| Mn(52)-Cl(54) | 2.6141(4)  |
| N(2)-C(3)     | 1.3386(17) |
| N(2)-C(1)     | 1.3396(17) |
| N(9)-C(10)    | 1.4692(19) |
| N(9)-C(8)     | 1.4702(19) |
| N(9)-H(9)     | 0.89(2)    |
| N(12)-C(13)   | 1.466(2)   |
| N(12)-C(11)   | 1.467(2)   |

|             |            |
|-------------|------------|
| N(12)-H(12) | 0.88(2)    |
| N(15)-C(16) | 1.465(2)   |
| N(15)-C(14) | 1.471(2)   |
| N(15)-H(15) | 0.89(2)    |
| N(18)-C(19) | 1.464(2)   |
| N(18)-C(17) | 1.4717(19) |
| N(18)-H(18) | 0.87(2)    |
| N(29)-C(30) | 1.3381(17) |
| N(29)-C(28) | 1.3431(16) |
| N(36)-C(35) | 1.4726(18) |
| N(36)-C(37) | 1.4761(17) |
| N(36)-H(36) | 0.869(19)  |
| N(39)-C(38) | 1.4695(19) |
| N(39)-C(40) | 1.4701(19) |
| N(39)-H(39) | 0.86(2)    |
| N(42)-C(43) | 1.4639(18) |
| N(42)-C(41) | 1.4665(18) |
| N(42)-H(42) | 0.878(19)  |
| N(45)-C(46) | 1.4652(17) |
| N(45)-C(44) | 1.4659(17) |
| N(45)-H(45) | 0.858(19)  |
| C(1)-C(23)  | 1.396(2)   |
| C(1)-C(19)  | 1.515(2)   |
| C(3)-C(4)   | 1.401(2)   |
| C(3)-C(8)   | 1.515(2)   |
| C(4)-C(24)  | 1.393(2)   |
| C(4)-C(5)   | 1.510(2)   |
| C(5)-C(6)   | 1.519(3)   |
| C(5)-H(5A)  | 0.9900     |
| C(5)-H(5B)  | 0.9900     |
| C(6)-C(7)   | 1.526(2)   |
| C(6)-H(6A)  | 0.9900     |
| C(6)-H(6B)  | 0.9900     |
| C(7)-C(8)   | 1.525(2)   |
| C(7)-H(7A)  | 0.9900     |
| C(7)-H(7B)  | 0.9900     |



|              |            |
|--------------|------------|
| C(8)-H(8A)   | 1.0000     |
| C(10)-C(11)  | 1.523(2)   |
| C(10)-H(10A) | 0.9900     |
| C(10)-H(10B) | 0.9900     |
| C(11)-H(11A) | 0.9900     |
| C(11)-H(11B) | 0.9900     |
| C(13)-C(14)  | 1.516(3)   |
| C(13)-H(13A) | 0.9900     |
| C(13)-H(13B) | 0.9900     |
| C(14)-H(14A) | 0.9900     |
| C(14)-H(14B) | 0.9900     |
| C(16)-C(17)  | 1.517(3)   |
| C(16)-H(16A) | 0.9900     |
| C(16)-H(16B) | 0.9900     |
| C(17)-H(17A) | 0.9900     |
| C(17)-H(17B) | 0.9900     |
| C(19)-C(20)  | 1.525(2)   |
| C(19)-H(19A) | 1.0000     |
| C(20)-C(21)  | 1.523(3)   |
| C(20)-H(20A) | 0.9900     |
| C(20)-H(20B) | 0.9900     |
| C(21)-C(22)  | 1.521(3)   |
| C(21)-H(21A) | 0.9900     |
| C(21)-H(21B) | 0.9900     |
| C(22)-C(23)  | 1.515(2)   |
| C(22)-H(22A) | 0.9900     |
| C(22)-H(22B) | 0.9900     |
| C(23)-C(24)  | 1.387(2)   |
| C(24)-H(24A) | 0.9500     |
| C(28)-C(50)  | 1.3941(18) |
| C(28)-C(46)  | 1.5166(18) |
| C(30)-C(31)  | 1.3935(18) |
| C(30)-C(35)  | 1.5211(18) |
| C(31)-C(51)  | 1.3921(18) |
| C(31)-C(32)  | 1.5127(19) |
| C(32)-C(33)  | 1.529(2)   |

|              |            |
|--------------|------------|
| C(32)-H(32A) | 0.9900     |
| C(32)-H(32B) | 0.9900     |
| C(33)-C(34)  | 1.527(2)   |
| C(33)-H(33A) | 0.9900     |
| C(33)-H(33B) | 0.9900     |
| C(34)-C(35)  | 1.5267(19) |
| C(34)-H(34A) | 0.9900     |
| C(34)-H(34B) | 0.9900     |
| C(35)-H(35A) | 1.0000     |
| C(37)-C(38)  | 1.523(2)   |
| C(37)-H(37A) | 0.9900     |
| C(37)-H(37B) | 0.9900     |
| C(38)-H(38A) | 0.9900     |
| C(38)-H(38B) | 0.9900     |
| C(40)-C(41)  | 1.522(2)   |
| C(40)-H(40A) | 0.9900     |
| C(40)-H(40B) | 0.9900     |
| C(41)-H(41A) | 0.9900     |
| C(41)-H(41B) | 0.9900     |
| C(43)-C(44)  | 1.525(2)   |
| C(43)-H(43A) | 0.9900     |
| C(43)-H(43B) | 0.9900     |
| C(44)-H(44A) | 0.9900     |
| C(44)-H(44B) | 0.9900     |
| C(46)-C(47)  | 1.5311(18) |
| C(46)-H(46A) | 1.0000     |
| C(47)-C(48)  | 1.527(2)   |
| C(47)-H(47A) | 0.9900     |
| C(47)-H(47B) | 0.9900     |
| C(48)-C(49)  | 1.529(2)   |
| C(48)-H(48A) | 0.9900     |
| C(48)-H(48B) | 0.9900     |
| C(49)-C(50)  | 1.5138(18) |
| C(49)-H(49A) | 0.9900     |
| C(49)-H(49B) | 0.9900     |
| C(50)-C(51)  | 1.3931(18) |

|                      |             |
|----------------------|-------------|
| C(51)-H(51A)         | 0.9500      |
| C(1S)-Cl(3S)         | 1.7609(17)  |
| C(1S)-Cl(1S)         | 1.7650(17)  |
| C(1S)-Cl(2S)         | 1.7746(16)  |
| C(1S)-H(1SA)         | 1.0000      |
|                      |             |
| N(2)-Mn(25)-N(15)    | 140.78(5)   |
| N(2)-Mn(25)-N(12)    | 143.38(5)   |
| N(15)-Mn(25)-N(12)   | 75.60(5)    |
| N(2)-Mn(25)-N(9)     | 69.77(4)    |
| N(15)-Mn(25)-N(9)    | 147.02(5)   |
| N(12)-Mn(25)-N(9)    | 73.88(5)    |
| N(2)-Mn(25)-N(18)    | 68.67(4)    |
| N(15)-Mn(25)-N(18)   | 73.66(5)    |
| N(12)-Mn(25)-N(18)   | 147.28(5)   |
| N(9)-Mn(25)-N(18)    | 138.42(5)   |
| N(2)-Mn(25)-Cl(26)   | 94.55(3)    |
| N(15)-Mn(25)-Cl(26)  | 92.85(4)    |
| N(12)-Mn(25)-Cl(26)  | 85.32(4)    |
| N(9)-Mn(25)-Cl(26)   | 96.84(4)    |
| N(18)-Mn(25)-Cl(26)  | 85.26(4)    |
| N(2)-Mn(25)-Cl(27)   | 86.27(3)    |
| N(15)-Mn(25)-Cl(27)  | 85.96(4)    |
| N(12)-Mn(25)-Cl(27)  | 94.56(4)    |
| N(9)-Mn(25)-Cl(27)   | 84.27(3)    |
| N(18)-Mn(25)-Cl(27)  | 94.22(4)    |
| Cl(26)-Mn(25)-Cl(27) | 178.790(15) |
| N(29)-Mn(52)-N(39)   | 142.68(4)   |
| N(29)-Mn(52)-N(42)   | 142.26(4)   |
| N(39)-Mn(52)-N(42)   | 74.94(4)    |
| N(29)-Mn(52)-N(45)   | 69.71(4)    |
| N(39)-Mn(52)-N(45)   | 145.06(4)   |
| N(42)-Mn(52)-N(45)   | 73.16(4)    |
| N(29)-Mn(52)-N(36)   | 70.31(4)    |
| N(39)-Mn(52)-N(36)   | 74.02(4)    |
| N(42)-Mn(52)-N(36)   | 146.16(4)   |

|                      |             |
|----------------------|-------------|
| N(45)-Mn(52)-N(36)   | 140.01(4)   |
| N(29)-Mn(52)-Cl(53)  | 85.78(3)    |
| N(39)-Mn(52)-Cl(53)  | 87.19(3)    |
| N(42)-Mn(52)-Cl(53)  | 95.85(3)    |
| N(45)-Mn(52)-Cl(53)  | 82.28(3)    |
| N(36)-Mn(52)-Cl(53)  | 95.77(3)    |
| N(29)-Mn(52)-Cl(54)  | 93.17(3)    |
| N(39)-Mn(52)-Cl(54)  | 97.48(3)    |
| N(42)-Mn(52)-Cl(54)  | 81.03(3)    |
| N(45)-Mn(52)-Cl(54)  | 91.29(3)    |
| N(36)-Mn(52)-Cl(54)  | 89.95(3)    |
| Cl(53)-Mn(52)-Cl(54) | 173.454(14) |
| C(3)-N(2)-C(1)       | 120.46(12)  |
| C(3)-N(2)-Mn(25)     | 119.50(9)   |
| C(1)-N(2)-Mn(25)     | 120.00(9)   |
| C(10)-N(9)-C(8)      | 116.09(12)  |
| C(10)-N(9)-Mn(25)    | 111.03(10)  |
| C(8)-N(9)-Mn(25)     | 109.02(8)   |
| C(10)-N(9)-H(9)      | 111.6(13)   |
| C(8)-N(9)-H(9)       | 107.1(14)   |
| Mn(25)-N(9)-H(9)     | 100.9(13)   |
| C(13)-N(12)-C(11)    | 116.01(14)  |
| C(13)-N(12)-Mn(25)   | 108.84(11)  |
| C(11)-N(12)-Mn(25)   | 111.11(10)  |
| C(13)-N(12)-H(12)    | 106.2(15)   |
| C(11)-N(12)-H(12)    | 109.6(15)   |
| Mn(25)-N(12)-H(12)   | 104.4(15)   |
| C(16)-N(15)-C(14)    | 115.85(14)  |
| C(16)-N(15)-Mn(25)   | 109.04(10)  |
| C(14)-N(15)-Mn(25)   | 110.01(10)  |
| C(16)-N(15)-H(15)    | 105.3(13)   |
| C(14)-N(15)-H(15)    | 107.1(14)   |
| Mn(25)-N(15)-H(15)   | 109.2(14)   |
| C(19)-N(18)-C(17)    | 116.54(13)  |
| C(19)-N(18)-Mn(25)   | 110.39(9)   |
| C(17)-N(18)-Mn(25)   | 111.88(10)  |

|                    |            |
|--------------------|------------|
| C(19)-N(18)-H(18)  | 107.4(13)  |
| C(17)-N(18)-H(18)  | 108.7(13)  |
| Mn(25)-N(18)-H(18) | 100.6(13)  |
| C(30)-N(29)-C(28)  | 120.42(11) |
| C(30)-N(29)-Mn(52) | 118.73(8)  |
| C(28)-N(29)-Mn(52) | 120.66(9)  |
| C(35)-N(36)-C(37)  | 114.37(11) |
| C(35)-N(36)-Mn(52) | 106.70(8)  |
| C(37)-N(36)-Mn(52) | 110.70(9)  |
| C(35)-N(36)-H(36)  | 106.9(12)  |
| C(37)-N(36)-H(36)  | 108.4(12)  |
| Mn(52)-N(36)-H(36) | 109.7(12)  |
| C(38)-N(39)-C(40)  | 115.04(12) |
| C(38)-N(39)-Mn(52) | 110.38(9)  |
| C(40)-N(39)-Mn(52) | 110.50(9)  |
| C(38)-N(39)-H(39)  | 108.3(13)  |
| C(40)-N(39)-H(39)  | 107.3(13)  |
| Mn(52)-N(39)-H(39) | 104.7(13)  |
| C(43)-N(42)-C(41)  | 115.63(12) |
| C(43)-N(42)-Mn(52) | 111.16(9)  |
| C(41)-N(42)-Mn(52) | 109.20(9)  |
| C(43)-N(42)-H(42)  | 107.1(12)  |
| C(41)-N(42)-H(42)  | 111.4(12)  |
| Mn(52)-N(42)-H(42) | 101.5(12)  |
| C(46)-N(45)-C(44)  | 115.81(11) |
| C(46)-N(45)-Mn(52) | 111.59(8)  |
| C(44)-N(45)-Mn(52) | 112.22(8)  |
| C(46)-N(45)-H(45)  | 110.0(12)  |
| C(44)-N(45)-H(45)  | 110.4(12)  |
| Mn(52)-N(45)-H(45) | 94.9(11)   |
| N(2)-C(1)-C(23)    | 122.00(13) |
| N(2)-C(1)-C(19)    | 115.39(13) |
| C(23)-C(1)-C(19)   | 122.61(13) |
| N(2)-C(3)-C(4)     | 121.79(14) |
| N(2)-C(3)-C(8)     | 114.99(12) |
| C(4)-C(3)-C(8)     | 123.22(13) |

|                     |            |
|---------------------|------------|
| C(24)-C(4)-C(3)     | 116.88(14) |
| C(24)-C(4)-C(5)     | 121.83(14) |
| C(3)-C(4)-C(5)      | 121.29(15) |
| C(4)-C(5)-C(6)      | 112.88(14) |
| C(4)-C(5)-H(5A)     | 109.0      |
| C(6)-C(5)-H(5A)     | 109.0      |
| C(4)-C(5)-H(5B)     | 109.0      |
| C(6)-C(5)-H(5B)     | 109.0      |
| H(5A)-C(5)-H(5B)    | 107.8      |
| C(5)-C(6)-C(7)      | 111.37(14) |
| C(5)-C(6)-H(6A)     | 109.4      |
| C(7)-C(6)-H(6A)     | 109.4      |
| C(5)-C(6)-H(6B)     | 109.4      |
| C(7)-C(6)-H(6B)     | 109.4      |
| H(6A)-C(6)-H(6B)    | 108.0      |
| C(8)-C(7)-C(6)      | 109.94(13) |
| C(8)-C(7)-H(7A)     | 109.7      |
| C(6)-C(7)-H(7A)     | 109.7      |
| C(8)-C(7)-H(7B)     | 109.7      |
| C(6)-C(7)-H(7B)     | 109.7      |
| H(7A)-C(7)-H(7B)    | 108.2      |
| N(9)-C(8)-C(3)      | 107.99(11) |
| N(9)-C(8)-C(7)      | 115.95(12) |
| C(3)-C(8)-C(7)      | 110.40(13) |
| N(9)-C(8)-H(8A)     | 107.4      |
| C(3)-C(8)-H(8A)     | 107.4      |
| C(7)-C(8)-H(8A)     | 107.4      |
| N(9)-C(10)-C(11)    | 108.74(13) |
| N(9)-C(10)-H(10A)   | 109.9      |
| C(11)-C(10)-H(10A)  | 109.9      |
| N(9)-C(10)-H(10B)   | 109.9      |
| C(11)-C(10)-H(10B)  | 109.9      |
| H(10A)-C(10)-H(10B) | 108.3      |
| N(12)-C(11)-C(10)   | 108.37(13) |
| N(12)-C(11)-H(11A)  | 110.0      |
| C(10)-C(11)-H(11A)  | 110.0      |

|                     |            |
|---------------------|------------|
| N(12)-C(11)-H(11B)  | 110.0      |
| C(10)-C(11)-H(11B)  | 110.0      |
| H(11A)-C(11)-H(11B) | 108.4      |
| N(12)-C(13)-C(14)   | 107.55(14) |
| N(12)-C(13)-H(13A)  | 110.2      |
| C(14)-C(13)-H(13A)  | 110.2      |
| N(12)-C(13)-H(13B)  | 110.2      |
| C(14)-C(13)-H(13B)  | 110.2      |
| H(13A)-C(13)-H(13B) | 108.5      |
| N(15)-C(14)-C(13)   | 109.18(14) |
| N(15)-C(14)-H(14A)  | 109.8      |
| C(13)-C(14)-H(14A)  | 109.8      |
| N(15)-C(14)-H(14B)  | 109.8      |
| C(13)-C(14)-H(14B)  | 109.8      |
| H(14A)-C(14)-H(14B) | 108.3      |
| N(15)-C(16)-C(17)   | 108.32(13) |
| N(15)-C(16)-H(16A)  | 110.0      |
| C(17)-C(16)-H(16A)  | 110.0      |
| N(15)-C(16)-H(16B)  | 110.0      |
| C(17)-C(16)-H(16B)  | 110.0      |
| H(16A)-C(16)-H(16B) | 108.4      |
| N(18)-C(17)-C(16)   | 109.11(13) |
| N(18)-C(17)-H(17A)  | 109.9      |
| C(16)-C(17)-H(17A)  | 109.9      |
| N(18)-C(17)-H(17B)  | 109.9      |
| C(16)-C(17)-H(17B)  | 109.9      |
| H(17A)-C(17)-H(17B) | 108.3      |
| N(18)-C(19)-C(1)    | 107.66(11) |
| N(18)-C(19)-C(20)   | 116.43(13) |
| C(1)-C(19)-C(20)    | 110.23(14) |
| N(18)-C(19)-H(19A)  | 107.4      |
| C(1)-C(19)-H(19A)   | 107.4      |
| C(20)-C(19)-H(19A)  | 107.4      |
| C(21)-C(20)-C(19)   | 109.80(14) |
| C(21)-C(20)-H(20A)  | 109.7      |
| C(19)-C(20)-H(20A)  | 109.7      |

|                     |            |
|---------------------|------------|
| C(21)-C(20)-H(20B)  | 109.7      |
| C(19)-C(20)-H(20B)  | 109.7      |
| H(20A)-C(20)-H(20B) | 108.2      |
| C(22)-C(21)-C(20)   | 111.54(14) |
| C(22)-C(21)-H(21A)  | 109.3      |
| C(20)-C(21)-H(21A)  | 109.3      |
| C(22)-C(21)-H(21B)  | 109.3      |
| C(20)-C(21)-H(21B)  | 109.3      |
| H(21A)-C(21)-H(21B) | 108.0      |
| C(23)-C(22)-C(21)   | 112.96(15) |
| C(23)-C(22)-H(22A)  | 109.0      |
| C(21)-C(22)-H(22A)  | 109.0      |
| C(23)-C(22)-H(22B)  | 109.0      |
| C(21)-C(22)-H(22B)  | 109.0      |
| H(22A)-C(22)-H(22B) | 107.8      |
| C(24)-C(23)-C(1)    | 117.05(14) |
| C(24)-C(23)-C(22)   | 121.21(15) |
| C(1)-C(23)-C(22)    | 121.64(15) |
| C(23)-C(24)-C(4)    | 121.79(14) |
| C(23)-C(24)-H(24A)  | 119.1      |
| C(4)-C(24)-H(24A)   | 119.1      |
| N(29)-C(28)-C(50)   | 121.67(12) |
| N(29)-C(28)-C(46)   | 115.61(11) |
| C(50)-C(28)-C(46)   | 122.71(11) |
| N(29)-C(30)-C(31)   | 121.98(12) |
| N(29)-C(30)-C(35)   | 115.25(11) |
| C(31)-C(30)-C(35)   | 122.73(12) |
| C(51)-C(31)-C(30)   | 117.28(12) |
| C(51)-C(31)-C(32)   | 121.09(12) |
| C(30)-C(31)-C(32)   | 121.63(12) |
| C(31)-C(32)-C(33)   | 112.39(12) |
| C(31)-C(32)-H(32A)  | 109.1      |
| C(33)-C(32)-H(32A)  | 109.1      |
| C(31)-C(32)-H(32B)  | 109.1      |
| C(33)-C(32)-H(32B)  | 109.1      |
| H(32A)-C(32)-H(32B) | 107.9      |



|                     |            |
|---------------------|------------|
| C(34)-C(33)-C(32)   | 110.36(12) |
| C(34)-C(33)-H(33A)  | 109.6      |
| C(32)-C(33)-H(33A)  | 109.6      |
| C(34)-C(33)-H(33B)  | 109.6      |
| C(32)-C(33)-H(33B)  | 109.6      |
| H(33A)-C(33)-H(33B) | 108.1      |
| C(35)-C(34)-C(33)   | 110.06(11) |
| C(35)-C(34)-H(34A)  | 109.6      |
| C(33)-C(34)-H(34A)  | 109.6      |
| C(35)-C(34)-H(34B)  | 109.6      |
| C(33)-C(34)-H(34B)  | 109.6      |
| H(34A)-C(34)-H(34B) | 108.2      |
| N(36)-C(35)-C(30)   | 108.53(11) |
| N(36)-C(35)-C(34)   | 115.92(11) |
| C(30)-C(35)-C(34)   | 110.80(11) |
| N(36)-C(35)-H(35A)  | 107.1      |
| C(30)-C(35)-H(35A)  | 107.1      |
| C(34)-C(35)-H(35A)  | 107.1      |
| N(36)-C(37)-C(38)   | 109.59(11) |
| N(36)-C(37)-H(37A)  | 109.8      |
| C(38)-C(37)-H(37A)  | 109.8      |
| N(36)-C(37)-H(37B)  | 109.8      |
| C(38)-C(37)-H(37B)  | 109.8      |
| H(37A)-C(37)-H(37B) | 108.2      |
| N(39)-C(38)-C(37)   | 108.09(11) |
| N(39)-C(38)-H(38A)  | 110.1      |
| C(37)-C(38)-H(38A)  | 110.1      |
| N(39)-C(38)-H(38B)  | 110.1      |
| C(37)-C(38)-H(38B)  | 110.1      |
| H(38A)-C(38)-H(38B) | 108.4      |
| N(39)-C(40)-C(41)   | 108.66(12) |
| N(39)-C(40)-H(40A)  | 110.0      |
| C(41)-C(40)-H(40A)  | 110.0      |
| N(39)-C(40)-H(40B)  | 110.0      |
| C(41)-C(40)-H(40B)  | 110.0      |
| H(40A)-C(40)-H(40B) | 108.3      |

|                     |            |
|---------------------|------------|
| N(42)-C(41)-C(40)   | 108.31(12) |
| N(42)-C(41)-H(41A)  | 110.0      |
| C(40)-C(41)-H(41A)  | 110.0      |
| N(42)-C(41)-H(41B)  | 110.0      |
| C(40)-C(41)-H(41B)  | 110.0      |
| H(41A)-C(41)-H(41B) | 108.4      |
| N(42)-C(43)-C(44)   | 108.72(12) |
| N(42)-C(43)-H(43A)  | 109.9      |
| C(44)-C(43)-H(43A)  | 109.9      |
| N(42)-C(43)-H(43B)  | 109.9      |
| C(44)-C(43)-H(43B)  | 109.9      |
| H(43A)-C(43)-H(43B) | 108.3      |
| N(45)-C(44)-C(43)   | 108.97(11) |
| N(45)-C(44)-H(44A)  | 109.9      |
| C(43)-C(44)-H(44A)  | 109.9      |
| N(45)-C(44)-H(44B)  | 109.9      |
| C(43)-C(44)-H(44B)  | 109.9      |
| H(44A)-C(44)-H(44B) | 108.3      |
| N(45)-C(46)-C(28)   | 108.06(10) |
| N(45)-C(46)-C(47)   | 115.34(11) |
| C(28)-C(46)-C(47)   | 110.44(11) |
| N(45)-C(46)-H(46A)  | 107.6      |
| C(28)-C(46)-H(46A)  | 107.6      |
| C(47)-C(46)-H(46A)  | 107.6      |
| C(48)-C(47)-C(46)   | 110.41(11) |
| C(48)-C(47)-H(47A)  | 109.6      |
| C(46)-C(47)-H(47A)  | 109.6      |
| C(48)-C(47)-H(47B)  | 109.6      |
| C(46)-C(47)-H(47B)  | 109.6      |
| H(47A)-C(47)-H(47B) | 108.1      |
| C(47)-C(48)-C(49)   | 110.85(12) |
| C(47)-C(48)-H(48A)  | 109.5      |
| C(49)-C(48)-H(48A)  | 109.5      |
| C(47)-C(48)-H(48B)  | 109.5      |
| C(49)-C(48)-H(48B)  | 109.5      |
| H(48A)-C(48)-H(48B) | 108.1      |

|                     |            |
|---------------------|------------|
| C(50)-C(49)-C(48)   | 113.40(11) |
| C(50)-C(49)-H(49A)  | 108.9      |
| C(48)-C(49)-H(49A)  | 108.9      |
| C(50)-C(49)-H(49B)  | 108.9      |
| C(48)-C(49)-H(49B)  | 108.9      |
| H(49A)-C(49)-H(49B) | 107.7      |
| C(51)-C(50)-C(28)   | 117.41(12) |
| C(51)-C(50)-C(49)   | 120.81(12) |
| C(28)-C(50)-C(49)   | 121.72(12) |
| C(31)-C(51)-C(50)   | 121.20(12) |
| C(31)-C(51)-H(51A)  | 119.4      |
| C(50)-C(51)-H(51A)  | 119.4      |
| Cl(3S)-C(1S)-Cl(1S) | 110.65(9)  |
| Cl(3S)-C(1S)-Cl(2S) | 110.57(9)  |
| Cl(1S)-C(1S)-Cl(2S) | 109.92(9)  |
| Cl(3S)-C(1S)-H(1SA) | 108.5      |
| Cl(1S)-C(1S)-H(1SA) | 108.5      |
| Cl(2S)-C(1S)-H(1SA) | 108.5      |

---

Symmetry transformations used to generate equivalent atoms:

Table 15. Anisotropic displacement parameters ( $\text{\AA}^2 \times 10^3$ ) for **17**. The anisotropic displacement factor exponent takes the form:  $-2p^2[ h^2 a^*2U^{11} + \dots + 2 h k a^* b^* U^{12} ]$

|        | U <sup>11</sup> | U <sup>22</sup> | U <sup>33</sup> | U <sup>23</sup> | U <sup>13</sup> | U <sup>12</sup> |
|--------|-----------------|-----------------|-----------------|-----------------|-----------------|-----------------|
| Mn(25) | 21(1)           | 11(1)           | 17(1)           | 2(1)            | 10(1)           | 2(1)            |
| Mn(52) | 13(1)           | 12(1)           | 13(1)           | 1(1)            | 5(1)            | 1(1)            |
| Cl(26) | 41(1)           | 15(1)           | 16(1)           | 2(1)            | 13(1)           | 4(1)            |
| Cl(27) | 24(1)           | 19(1)           | 16(1)           | 3(1)            | 11(1)           | 3(1)            |
| Cl(53) | 19(1)           | 23(1)           | 13(1)           | -1(1)           | 7(1)            | 1(1)            |
| Cl(54) | 21(1)           | 23(1)           | 16(1)           | -4(1)           | 9(1)            | -4(1)           |
| N(2)   | 18(1)           | 14(1)           | 14(1)           | 1(1)            | 10(1)           | 2(1)            |
| N(9)   | 19(1)           | 21(1)           | 18(1)           | 3(1)            | 9(1)            | 0(1)            |
| N(12)  | 36(1)           | 18(1)           | 17(1)           | 1(1)            | 8(1)            | -6(1)           |

|       |       |       |       |        |       |        |
|-------|-------|-------|-------|--------|-------|--------|
| N(15) | 41(1) | 15(1) | 16(1) | 2(1)   | 11(1) | 8(1)   |
| N(18) | 22(1) | 22(1) | 18(1) | 6(1)   | 12(1) | 10(1)  |
| N(29) | 13(1) | 13(1) | 12(1) | 0(1)   | 6(1)  | 0(1)   |
| N(36) | 13(1) | 17(1) | 12(1) | 0(1)   | 5(1)  | 2(1)   |
| N(39) | 17(1) | 18(1) | 14(1) | 1(1)   | 7(1)  | 2(1)   |
| N(42) | 19(1) | 16(1) | 16(1) | 1(1)   | 8(1)  | 2(1)   |
| N(45) | 16(1) | 12(1) | 12(1) | 0(1)   | 6(1)  | -1(1)  |
| C(1)  | 19(1) | 20(1) | 13(1) | 1(1)   | 10(1) | -1(1)  |
| C(3)  | 23(1) | 15(1) | 14(1) | 2(1)   | 12(1) | 4(1)   |
| C(4)  | 36(1) | 14(1) | 19(1) | 3(1)   | 18(1) | 6(1)   |
| C(5)  | 50(1) | 18(1) | 27(1) | 7(1)   | 24(1) | 15(1)  |
| C(6)  | 38(1) | 31(1) | 26(1) | 13(1)  | 19(1) | 22(1)  |
| C(7)  | 25(1) | 34(1) | 27(1) | 10(1)  | 16(1) | 14(1)  |
| C(8)  | 18(1) | 20(1) | 18(1) | 4(1)   | 10(1) | 5(1)   |
| C(10) | 18(1) | 34(1) | 28(1) | 0(1)   | 10(1) | -6(1)  |
| C(11) | 31(1) | 31(1) | 28(1) | 0(1)   | 14(1) | -14(1) |
| C(13) | 49(1) | 16(1) | 19(1) | 1(1)   | 6(1)  | -10(1) |
| C(14) | 56(1) | 12(1) | 21(1) | -1(1)  | 7(1)  | 5(1)   |
| C(16) | 51(1) | 25(1) | 22(1) | 8(1)   | 21(1) | 23(1)  |
| C(17) | 32(1) | 33(1) | 29(1) | 13(1)  | 20(1) | 20(1)  |
| C(19) | 16(1) | 29(1) | 17(1) | 3(1)   | 9(1)  | 3(1)   |
| C(20) | 18(1) | 50(1) | 24(1) | 2(1)   | 12(1) | -1(1)  |
| C(21) | 23(1) | 62(1) | 23(1) | -5(1)  | 11(1) | -13(1) |
| C(22) | 36(1) | 39(1) | 29(1) | -10(1) | 17(1) | -20(1) |
| C(23) | 30(1) | 22(1) | 19(1) | -4(1)  | 14(1) | -9(1)  |
| C(24) | 43(1) | 15(1) | 24(1) | -2(1)  | 20(1) | -4(1)  |
| C(28) | 13(1) | 13(1) | 11(1) | 0(1)   | 6(1)  | 0(1)   |
| C(30) | 14(1) | 14(1) | 12(1) | 0(1)   | 6(1)  | 0(1)   |
| C(31) | 17(1) | 14(1) | 15(1) | -1(1)  | 8(1)  | -2(1)  |
| C(32) | 20(1) | 14(1) | 26(1) | 0(1)   | 8(1)  | -4(1)  |
| C(33) | 18(1) | 18(1) | 27(1) | -5(1)  | 8(1)  | -5(1)  |
| C(34) | 15(1) | 19(1) | 26(1) | -3(1)  | 9(1)  | -4(1)  |
| C(35) | 13(1) | 15(1) | 14(1) | -2(1)  | 6(1)  | -1(1)  |
| C(37) | 12(1) | 22(1) | 17(1) | 1(1)   | 5(1)  | 1(1)   |
| C(38) | 15(1) | 23(1) | 17(1) | 2(1)   | 7(1)  | 5(1)   |
| C(40) | 20(1) | 17(1) | 23(1) | 2(1)   | 6(1)  | 6(1)   |

|        |       |       |       |       |       |       |
|--------|-------|-------|-------|-------|-------|-------|
| C(41)  | 24(1) | 15(1) | 21(1) | 5(1)  | 7(1)  | 4(1)  |
| C(43)  | 21(1) | 14(1) | 22(1) | 4(1)  | 11(1) | 0(1)  |
| C(44)  | 18(1) | 13(1) | 20(1) | 0(1)  | 7(1)  | -2(1) |
| C(46)  | 13(1) | 13(1) | 13(1) | 0(1)  | 5(1)  | -1(1) |
| C(47)  | 13(1) | 18(1) | 21(1) | 3(1)  | 7(1)  | -2(1) |
| C(48)  | 14(1) | 20(1) | 19(1) | 2(1)  | 3(1)  | 0(1)  |
| C(49)  | 14(1) | 18(1) | 19(1) | 2(1)  | 5(1)  | 2(1)  |
| C(50)  | 14(1) | 15(1) | 12(1) | 0(1)  | 5(1)  | 1(1)  |
| C(51)  | 18(1) | 12(1) | 17(1) | 1(1)  | 8(1)  | 2(1)  |
| C(1S)  | 23(1) | 25(1) | 23(1) | 3(1)  | 11(1) | 3(1)  |
| Cl(1S) | 32(1) | 24(1) | 27(1) | -5(1) | 15(1) | -2(1) |
| Cl(2S) | 40(1) | 41(1) | 39(1) | 16(1) | 12(1) | 15(1) |
| Cl(3S) | 22(1) | 26(1) | 26(1) | -2(1) | 9(1)  | -2(1) |
| O(1S)  | 20(1) | 25(1) | 21(1) | 0     | 10(1) | 0     |
| O(2S)  | 64(2) | 60(2) | 84(2) | 0     | 18(2) | 0     |

Table 16. Hydrogen coordinates ( $\times 10^4$ ) and isotropic displacement parameters ( $\text{\AA}^2 \times 10^{-3}$ ) for **17**.

|       | x       | y         | z        | U(eq) |
|-------|---------|-----------|----------|-------|
| H(9)  | 1318(7) | 5274(17)  | 4095(9)  | 30(5) |
| H(12) | 1211(7) | 2736(19)  | 3215(10) | 39(6) |
| H(15) | 2362(7) | 2331(18)  | 4395(9)  | 33(6) |
| H(18) | 2552(6) | 4693(16)  | 3639(9)  | 25(5) |
| H(36) | 164(6)  | 8920(15)  | 1730(8)  | 20(5) |
| H(39) | -63(6)  | 10952(16) | 526(9)   | 23(5) |
| H(42) | 843(6)  | 12476(15) | 1717(8)  | 18(4) |
| H(45) | 1441(6) | 10294(15) | 1453(8)  | 14(4) |
| H(5A) | 1450    | 9223      | 3347     | 35    |
| H(5B) | 1360    | 8992      | 3894     | 35    |
| H(6A) | 932     | 7974      | 2779     | 36    |
| H(6B) | 702     | 8608      | 3114     | 36    |

|        |      |       |      |    |
|--------|------|-------|------|----|
| H(7A)  | 918  | 7123  | 3810 | 32 |
| H(7B)  | 587  | 6713  | 3167 | 32 |
| H(8A)  | 1166 | 6008  | 3025 | 22 |
| H(10A) | 735  | 4417  | 3028 | 32 |
| H(10B) | 610  | 4761  | 3536 | 32 |
| H(11A) | 1052 | 3295  | 4130 | 36 |
| H(11B) | 691  | 2799  | 3521 | 36 |
| H(13A) | 1282 | 1187  | 3706 | 38 |
| H(13B) | 1599 | 1830  | 4294 | 38 |
| H(14A) | 2032 | 837   | 3934 | 41 |
| H(14B) | 1798 | 1509  | 3333 | 41 |
| H(16A) | 2439 | 2571  | 3399 | 37 |
| H(16B) | 2744 | 1791  | 3936 | 37 |
| H(17A) | 3019 | 3344  | 4552 | 35 |
| H(17B) | 3099 | 3528  | 3991 | 35 |
| H(19A) | 2843 | 5157  | 4776 | 24 |
| H(20A) | 3458 | 5301  | 4603 | 36 |
| H(20B) | 3191 | 6072  | 4046 | 36 |
| H(21A) | 3376 | 6686  | 5210 | 43 |
| H(21B) | 3652 | 7138  | 4891 | 43 |
| H(22A) | 3070 | 8368  | 4868 | 41 |
| H(22B) | 3083 | 8193  | 4261 | 41 |
| H(24A) | 2264 | 8938  | 4157 | 30 |
| H(32A) | 681  | 5447  | 2011 | 25 |
| H(32B) | 869  | 5141  | 1562 | 25 |
| H(33A) | 275  | 5958  | 795  | 26 |
| H(33B) | 64   | 5238  | 1127 | 26 |
| H(34A) | -270 | 6985  | 949  | 24 |
| H(34B) | 33   | 6878  | 1638 | 24 |
| H(35A) | 264  | 8017  | 843  | 17 |
| H(37A) | -515 | 8965  | 1068 | 21 |
| H(37B) | -357 | 9124  | 574  | 21 |
| H(38A) | -642 | 10825 | 716  | 22 |
| H(38B) | -299 | 10804 | 1396 | 22 |
| H(40A) | 22   | 12553 | 1299 | 26 |
| H(40B) | -253 | 12654 | 604  | 26 |

|        |      |       |      |    |
|--------|------|-------|------|----|
| H(41A) | 417  | 12501 | 520  | 26 |
| H(41B) | 445  | 13540 | 922  | 26 |
| H(43A) | 1319 | 13190 | 1435 | 23 |
| H(43B) | 1212 | 12177 | 989  | 23 |
| H(44A) | 1873 | 11780 | 1842 | 21 |
| H(44B) | 1626 | 11963 | 2238 | 21 |
| H(46A) | 1693 | 10110 | 2608 | 16 |
| H(47A) | 2207 | 9424  | 2039 | 21 |
| H(47B) | 2345 | 10363 | 2529 | 21 |
| H(48A) | 2374 | 8995  | 3218 | 23 |
| H(48B) | 2723 | 8733  | 2976 | 23 |
| H(49A) | 2308 | 7321  | 2404 | 21 |
| H(49B) | 2273 | 7157  | 2996 | 21 |
| H(51A) | 1582 | 6042  | 2308 | 19 |
| H(1SA) | 6512 | -957  | 5262 | 28 |

---

Table 17. Torsion angles [°] for **17**.

|                         |             |
|-------------------------|-------------|
| N(15)-Mn(25)-N(2)-C(3)  | 178.07(10)  |
| N(12)-Mn(25)-N(2)-C(3)  | -10.35(15)  |
| N(9)-Mn(25)-N(2)-C(3)   | -17.71(10)  |
| N(18)-Mn(25)-N(2)-C(3)  | 161.03(12)  |
| Cl(26)-Mn(25)-N(2)-C(3) | 77.92(10)   |
| Cl(27)-Mn(25)-N(2)-C(3) | -102.97(10) |
| N(15)-Mn(25)-N(2)-C(1)  | -4.30(15)   |
| N(12)-Mn(25)-N(2)-C(1)  | 167.28(10)  |
| N(9)-Mn(25)-N(2)-C(1)   | 159.92(12)  |
| N(18)-Mn(25)-N(2)-C(1)  | -21.35(10)  |
| Cl(26)-Mn(25)-N(2)-C(1) | -104.46(10) |
| Cl(27)-Mn(25)-N(2)-C(1) | 74.66(10)   |
| N(2)-Mn(25)-N(9)-C(10)  | 163.60(12)  |
| N(15)-Mn(25)-N(9)-C(10) | -34.81(15)  |
| N(12)-Mn(25)-N(9)-C(10) | -11.83(10)  |
| N(18)-Mn(25)-N(9)-C(10) | 161.83(10)  |

|                           |             |
|---------------------------|-------------|
| Cl(26)-Mn(25)-N(9)-C(10)  | 71.26(10)   |
| Cl(27)-Mn(25)-N(9)-C(10)  | -108.27(10) |
| N(2)-Mn(25)-N(9)-C(8)     | 34.49(9)    |
| N(15)-Mn(25)-N(9)-C(8)    | -163.93(10) |
| N(12)-Mn(25)-N(9)-C(8)    | -140.95(11) |
| N(18)-Mn(25)-N(9)-C(8)    | 32.71(13)   |
| Cl(26)-Mn(25)-N(9)-C(8)   | -57.86(10)  |
| Cl(27)-Mn(25)-N(9)-C(8)   | 122.62(10)  |
| N(2)-Mn(25)-N(12)-C(13)   | -155.39(10) |
| N(15)-Mn(25)-N(12)-C(13)  | 19.13(11)   |
| N(9)-Mn(25)-N(12)-C(13)   | -148.20(12) |
| N(18)-Mn(25)-N(12)-C(13)  | 39.59(16)   |
| Cl(26)-Mn(25)-N(12)-C(13) | 113.29(11)  |
| Cl(27)-Mn(25)-N(12)-C(13) | -65.51(11)  |
| N(2)-Mn(25)-N(12)-C(11)   | -26.45(15)  |
| N(15)-Mn(25)-N(12)-C(11)  | 148.06(12)  |
| N(9)-Mn(25)-N(12)-C(11)   | -19.26(11)  |
| N(18)-Mn(25)-N(12)-C(11)  | 168.53(10)  |
| Cl(26)-Mn(25)-N(12)-C(11) | -117.78(11) |
| Cl(27)-Mn(25)-N(12)-C(11) | 63.43(11)   |
| N(2)-Mn(25)-N(15)-C(16)   | -44.53(14)  |
| N(12)-Mn(25)-N(15)-C(16)  | 140.64(12)  |
| N(9)-Mn(25)-N(15)-C(16)   | 163.42(10)  |
| N(18)-Mn(25)-N(15)-C(16)  | -28.00(11)  |
| Cl(26)-Mn(25)-N(15)-C(16) | 56.22(11)   |
| Cl(27)-Mn(25)-N(15)-C(16) | -123.60(11) |
| N(2)-Mn(25)-N(15)-C(14)   | -172.60(10) |
| N(12)-Mn(25)-N(15)-C(14)  | 12.57(11)   |
| N(9)-Mn(25)-N(15)-C(14)   | 35.35(16)   |
| N(18)-Mn(25)-N(15)-C(14)  | -156.07(12) |
| Cl(26)-Mn(25)-N(15)-C(14) | -71.85(11)  |
| Cl(27)-Mn(25)-N(15)-C(14) | 108.33(11)  |
| N(2)-Mn(25)-N(18)-C(19)   | 35.47(9)    |
| N(15)-Mn(25)-N(18)-C(19)  | -133.39(11) |
| N(12)-Mn(25)-N(18)-C(19)  | -154.06(10) |
| N(9)-Mn(25)-N(18)-C(19)   | 37.26(13)   |



|                           |             |
|---------------------------|-------------|
| Cl(26)-Mn(25)-N(18)-C(19) | 132.23(10)  |
| Cl(27)-Mn(25)-N(18)-C(19) | -48.86(10)  |
| N(2)-Mn(25)-N(18)-C(17)   | 166.99(12)  |
| N(15)-Mn(25)-N(18)-C(17)  | -1.87(11)   |
| N(12)-Mn(25)-N(18)-C(17)  | -22.53(16)  |
| N(9)-Mn(25)-N(18)-C(17)   | 168.79(10)  |
| Cl(26)-Mn(25)-N(18)-C(17) | -96.24(11)  |
| Cl(27)-Mn(25)-N(18)-C(17) | 82.66(11)   |
| N(39)-Mn(52)-N(29)-C(30)  | 2.87(14)    |
| N(42)-Mn(52)-N(29)-C(30)  | -171.00(9)  |
| N(45)-Mn(52)-N(29)-C(30)  | -160.20(11) |
| N(36)-Mn(52)-N(29)-C(30)  | 20.78(10)   |
| Cl(53)-Mn(52)-N(29)-C(30) | -76.88(10)  |
| Cl(54)-Mn(52)-N(29)-C(30) | 109.59(10)  |
| N(39)-Mn(52)-N(29)-C(28)  | 177.86(9)   |
| N(42)-Mn(52)-N(29)-C(28)  | 4.00(14)    |
| N(45)-Mn(52)-N(29)-C(28)  | 14.79(10)   |
| N(36)-Mn(52)-N(29)-C(28)  | -164.22(11) |
| Cl(53)-Mn(52)-N(29)-C(28) | 98.11(10)   |
| Cl(54)-Mn(52)-N(29)-C(28) | -75.42(10)  |
| N(29)-Mn(52)-N(36)-C(35)  | -36.43(8)   |
| N(39)-Mn(52)-N(36)-C(35)  | 132.39(9)   |
| N(42)-Mn(52)-N(36)-C(35)  | 156.54(9)   |
| N(45)-Mn(52)-N(36)-C(35)  | -37.86(12)  |
| Cl(53)-Mn(52)-N(36)-C(35) | 46.99(8)    |
| Cl(54)-Mn(52)-N(36)-C(35) | -129.81(8)  |
| N(29)-Mn(52)-N(36)-C(37)  | -161.45(10) |
| N(39)-Mn(52)-N(36)-C(37)  | 7.37(9)     |
| N(42)-Mn(52)-N(36)-C(37)  | 31.52(14)   |
| N(45)-Mn(52)-N(36)-C(37)  | -162.88(9)  |
| Cl(53)-Mn(52)-N(36)-C(37) | -78.03(9)   |
| Cl(54)-Mn(52)-N(36)-C(37) | 105.17(9)   |
| N(29)-Mn(52)-N(39)-C(38)  | 40.81(13)   |
| N(42)-Mn(52)-N(39)-C(38)  | -143.07(10) |
| N(45)-Mn(52)-N(39)-C(38)  | -167.68(9)  |
| N(36)-Mn(52)-N(39)-C(38)  | 23.28(9)    |

|                           |             |
|---------------------------|-------------|
| Cl(53)-Mn(52)-N(39)-C(38) | 120.10(9)   |
| Cl(54)-Mn(52)-N(39)-C(38) | -64.51(9)   |
| N(29)-Mn(52)-N(39)-C(40)  | 169.21(9)   |
| N(42)-Mn(52)-N(39)-C(40)  | -14.68(10)  |
| N(45)-Mn(52)-N(39)-C(40)  | -39.28(14)  |
| N(36)-Mn(52)-N(39)-C(40)  | 151.68(11)  |
| Cl(53)-Mn(52)-N(39)-C(40) | -111.50(10) |
| Cl(54)-Mn(52)-N(39)-C(40) | 63.89(10)   |
| N(29)-Mn(52)-N(42)-C(43)  | 30.40(14)   |
| N(39)-Mn(52)-N(42)-C(43)  | -145.76(11) |
| N(45)-Mn(52)-N(42)-C(43)  | 19.82(10)   |
| N(36)-Mn(52)-N(42)-C(43)  | -169.80(9)  |
| Cl(53)-Mn(52)-N(42)-C(43) | -60.27(10)  |
| Cl(54)-Mn(52)-N(42)-C(43) | 113.93(10)  |
| N(29)-Mn(52)-N(42)-C(41)  | 159.15(9)   |
| N(39)-Mn(52)-N(42)-C(41)  | -17.00(10)  |
| N(45)-Mn(52)-N(42)-C(41)  | 148.57(11)  |
| N(36)-Mn(52)-N(42)-C(41)  | -41.04(14)  |
| Cl(53)-Mn(52)-N(42)-C(41) | 68.49(10)   |
| Cl(54)-Mn(52)-N(42)-C(41) | -117.31(10) |
| N(29)-Mn(52)-N(45)-C(46)  | -30.53(9)   |
| N(39)-Mn(52)-N(45)-C(46)  | 167.43(9)   |
| N(42)-Mn(52)-N(45)-C(46)  | 142.60(10)  |
| N(36)-Mn(52)-N(45)-C(46)  | -29.09(12)  |
| Cl(53)-Mn(52)-N(45)-C(46) | -118.87(9)  |
| Cl(54)-Mn(52)-N(45)-C(46) | 62.37(9)    |
| N(29)-Mn(52)-N(45)-C(44)  | -162.39(11) |
| N(39)-Mn(52)-N(45)-C(44)  | 35.57(14)   |
| N(42)-Mn(52)-N(45)-C(44)  | 10.73(9)    |
| N(36)-Mn(52)-N(45)-C(44)  | -160.95(9)  |
| Cl(53)-Mn(52)-N(45)-C(44) | 109.27(9)   |
| Cl(54)-Mn(52)-N(45)-C(44) | -69.49(9)   |
| C(3)-N(2)-C(1)-C(23)      | 1.1(2)      |
| Mn(25)-N(2)-C(1)-C(23)    | -176.54(11) |
| C(3)-N(2)-C(1)-C(19)      | -178.83(13) |
| Mn(25)-N(2)-C(1)-C(19)    | 3.56(16)    |

|                          |             |
|--------------------------|-------------|
| C(1)-N(2)-C(3)-C(4)      | -0.4(2)     |
| Mn(25)-N(2)-C(3)-C(4)    | 177.22(11)  |
| C(1)-N(2)-C(3)-C(8)      | 179.85(12)  |
| Mn(25)-N(2)-C(3)-C(8)    | -2.54(16)   |
| N(2)-C(3)-C(4)-C(24)     | -1.1(2)     |
| C(8)-C(3)-C(4)-C(24)     | 178.64(14)  |
| N(2)-C(3)-C(4)-C(5)      | 178.25(14)  |
| C(8)-C(3)-C(4)-C(5)      | -2.0(2)     |
| C(24)-C(4)-C(5)-C(6)     | 168.90(15)  |
| C(3)-C(4)-C(5)-C(6)      | -10.4(2)    |
| C(4)-C(5)-C(6)-C(7)      | 43.18(19)   |
| C(5)-C(6)-C(7)-C(8)      | -64.98(18)  |
| C(10)-N(9)-C(8)-C(3)     | -173.04(13) |
| Mn(25)-N(9)-C(8)-C(3)    | -46.77(13)  |
| C(10)-N(9)-C(8)-C(7)     | 62.52(19)   |
| Mn(25)-N(9)-C(8)-C(7)    | -171.21(11) |
| N(2)-C(3)-C(8)-N(9)      | 33.62(17)   |
| C(4)-C(3)-C(8)-N(9)      | -146.14(14) |
| N(2)-C(3)-C(8)-C(7)      | 161.32(13)  |
| C(4)-C(3)-C(8)-C(7)      | -18.4(2)    |
| C(6)-C(7)-C(8)-N(9)      | 173.55(14)  |
| C(6)-C(7)-C(8)-C(3)      | 50.36(18)   |
| C(8)-N(9)-C(10)-C(11)    | 165.25(14)  |
| Mn(25)-N(9)-C(10)-C(11)  | 40.01(16)   |
| C(13)-N(12)-C(11)-C(10)  | 171.97(14)  |
| Mn(25)-N(12)-C(11)-C(10) | 46.97(15)   |
| N(9)-C(10)-C(11)-N(12)   | -58.13(18)  |
| C(11)-N(12)-C(13)-C(14)  | -173.31(14) |
| Mn(25)-N(12)-C(13)-C(14) | -47.16(15)  |
| C(16)-N(15)-C(14)-C(13)  | -166.28(14) |
| Mn(25)-N(15)-C(14)-C(13) | -42.07(16)  |
| N(12)-C(13)-C(14)-N(15)  | 60.57(17)   |
| C(14)-N(15)-C(16)-C(17)  | 179.17(13)  |
| Mn(25)-N(15)-C(16)-C(17) | 54.46(14)   |
| C(19)-N(18)-C(17)-C(16)  | 158.73(13)  |
| Mn(25)-N(18)-C(17)-C(16) | 30.39(16)   |

|                          |             |
|--------------------------|-------------|
| N(15)-C(16)-C(17)-N(18)  | -56.53(17)  |
| C(17)-N(18)-C(19)-C(1)   | -174.01(13) |
| Mn(25)-N(18)-C(19)-C(1)  | -44.96(13)  |
| C(17)-N(18)-C(19)-C(20)  | 61.69(19)   |
| Mn(25)-N(18)-C(19)-C(20) | -169.25(11) |
| N(2)-C(1)-C(19)-N(18)    | 28.25(17)   |
| C(23)-C(1)-C(19)-N(18)   | -151.65(14) |
| N(2)-C(1)-C(19)-C(20)    | 156.21(13)  |
| C(23)-C(1)-C(19)-C(20)   | -23.7(2)    |
| N(18)-C(19)-C(20)-C(21)  | 175.76(14)  |
| C(1)-C(19)-C(20)-C(21)   | 52.79(18)   |
| C(19)-C(20)-C(21)-C(22)  | -64.25(19)  |
| C(20)-C(21)-C(22)-C(23)  | 42.1(2)     |
| N(2)-C(1)-C(23)-C(24)    | -0.2(2)     |
| C(19)-C(1)-C(23)-C(24)   | 179.71(14)  |
| N(2)-C(1)-C(23)-C(22)    | -176.70(14) |
| C(19)-C(1)-C(23)-C(22)   | 3.2(2)      |
| C(21)-C(22)-C(23)-C(24)  | 171.46(15)  |
| C(21)-C(22)-C(23)-C(1)   | -12.2(2)    |
| C(1)-C(23)-C(24)-C(4)    | -1.4(2)     |
| C(22)-C(23)-C(24)-C(4)   | 175.16(15)  |
| C(3)-C(4)-C(24)-C(23)    | 2.0(2)      |
| C(5)-C(4)-C(24)-C(23)    | -177.36(15) |
| C(30)-N(29)-C(28)-C(50)  | -1.2(2)     |
| Mn(52)-N(29)-C(28)-C(50) | -176.12(10) |
| C(30)-N(29)-C(28)-C(46)  | 178.17(12)  |
| Mn(52)-N(29)-C(28)-C(46) | 3.26(16)    |
| C(28)-N(29)-C(30)-C(31)  | 2.2(2)      |
| Mn(52)-N(29)-C(30)-C(31) | 177.19(10)  |
| C(28)-N(29)-C(30)-C(35)  | -175.69(12) |
| Mn(52)-N(29)-C(30)-C(35) | -0.68(16)   |
| N(29)-C(30)-C(31)-C(51)  | -1.3(2)     |
| C(35)-C(30)-C(31)-C(51)  | 176.46(13)  |
| N(29)-C(30)-C(31)-C(32)  | 178.57(13)  |
| C(35)-C(30)-C(31)-C(32)  | -3.7(2)     |
| C(51)-C(31)-C(32)-C(33)  | -163.36(14) |

|                          |             |
|--------------------------|-------------|
| C(30)-C(31)-C(32)-C(33)  | 16.8(2)     |
| C(31)-C(32)-C(33)-C(34)  | -46.76(18)  |
| C(32)-C(33)-C(34)-C(35)  | 65.30(17)   |
| C(37)-N(36)-C(35)-C(30)  | 170.66(11)  |
| Mn(52)-N(36)-C(35)-C(30) | 47.90(12)   |
| C(37)-N(36)-C(35)-C(34)  | -63.94(16)  |
| Mn(52)-N(36)-C(35)-C(34) | 173.31(10)  |
| N(29)-C(30)-C(35)-N(36)  | -33.29(16)  |
| C(31)-C(30)-C(35)-N(36)  | 148.85(13)  |
| N(29)-C(30)-C(35)-C(34)  | -161.64(12) |
| C(31)-C(30)-C(35)-C(34)  | 20.50(19)   |
| C(33)-C(34)-C(35)-N(36)  | -174.41(12) |
| C(33)-C(34)-C(35)-C(30)  | -50.18(16)  |
| C(35)-N(36)-C(37)-C(38)  | -156.50(12) |
| Mn(52)-N(36)-C(37)-C(38) | -35.94(14)  |
| C(40)-N(39)-C(38)-C(37)  | -176.22(12) |
| Mn(52)-N(39)-C(38)-C(37) | -50.34(13)  |
| N(36)-C(37)-C(38)-N(39)  | 57.82(15)   |
| C(38)-N(39)-C(40)-C(41)  | 169.43(12)  |
| Mn(52)-N(39)-C(40)-C(41) | 43.61(14)   |
| C(43)-N(42)-C(41)-C(40)  | 171.62(12)  |
| Mn(52)-N(42)-C(41)-C(40) | 45.38(14)   |
| N(39)-C(40)-C(41)-N(42)  | -60.31(16)  |
| C(41)-N(42)-C(43)-C(44)  | -172.09(12) |
| Mn(52)-N(42)-C(43)-C(44) | -46.86(14)  |
| C(46)-N(45)-C(44)-C(43)  | -168.15(12) |
| Mn(52)-N(45)-C(44)-C(43) | -38.44(14)  |
| N(42)-C(43)-C(44)-N(45)  | 56.84(16)   |
| C(44)-N(45)-C(46)-C(28)  | 171.41(11)  |
| Mn(52)-N(45)-C(46)-C(28) | 41.39(12)   |
| C(44)-N(45)-C(46)-C(47)  | -64.48(16)  |
| Mn(52)-N(45)-C(46)-C(47) | 165.50(9)   |
| N(29)-C(28)-C(46)-N(45)  | -30.07(16)  |
| C(50)-C(28)-C(46)-N(45)  | 149.31(13)  |
| N(29)-C(28)-C(46)-C(47)  | -157.08(12) |
| C(50)-C(28)-C(46)-C(47)  | 22.30(18)   |

|                         |             |
|-------------------------|-------------|
| N(45)-C(46)-C(47)-C(48) | -174.59(12) |
| C(28)-C(46)-C(47)-C(48) | -51.74(16)  |
| C(46)-C(47)-C(48)-C(49) | 63.56(16)   |
| C(47)-C(48)-C(49)-C(50) | -42.40(17)  |
| N(29)-C(28)-C(50)-C(51) | -0.6(2)     |
| C(46)-C(28)-C(50)-C(51) | -179.95(13) |
| N(29)-C(28)-C(50)-C(49) | 176.61(13)  |
| C(46)-C(28)-C(50)-C(49) | -2.7(2)     |
| C(48)-C(49)-C(50)-C(51) | -170.15(13) |
| C(48)-C(49)-C(50)-C(28) | 12.7(2)     |
| C(30)-C(31)-C(51)-C(50) | -0.6(2)     |
| C(32)-C(31)-C(51)-C(50) | 179.56(14)  |
| C(28)-C(50)-C(51)-C(31) | 1.5(2)      |
| C(49)-C(50)-C(51)-C(31) | -175.74(13) |

---

3,6,9,12,18-Pentaazabicyclo-  
[12,3,1]octadeca-1(18),14,16-triene

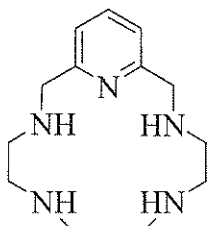

**SH05**

$C_{13}H_{23}N_5$

Exact Mass: 249.2

Mol. Wt.: 249.36

m/e: 249.20 (100.0%), 250.20 (14.3%),

250.19 (1.8%), 251.20 (1.2%)

C, 62.62; H, 9.30; N, 28.09

| INDEX | FREQUENCY | PPM   | HEIGHT |
|-------|-----------|-------|--------|
| 1     | 3022.6    | 7.559 | 7.0    |
| 2     | 3021.4    | 7.556 | 10.9   |
| 3     | 3013.8    | 7.537 | 21.9   |
| 4     | 3006.2    | 7.518 | 12.4   |
| 5     | 2908.0    | 7.272 | 114.8  |
| 6     | 2816.6    | 7.044 | 37.0   |
| 7     | 2809.2    | 7.025 | 34.2   |
| 8     | 1572.8    | 3.933 | 3.7    |
| 9     | 1567.2    | 3.919 | 4.4    |
| 10    | 1559.7    | 3.901 | 134.9  |
| 11    | 1547.8    | 3.871 | 2.2    |
| 12    | 1190.4    | 2.977 | 2.1    |
| 13    | 1143.2    | 2.859 | 25.2   |
| 14    | 1139.7    | 2.850 | 40.5   |
| 15    | 1135.8    | 2.840 | 41.3   |
| 16    | 1113.9    | 2.786 | 40.7   |
| 17    | 1112.1    | 2.781 | 36.8   |
| 18    | 1109.2    | 2.774 | 41.4   |
| 19    | 1104.9    | 2.763 | 25.8   |
| 20    | 1092.0    | 2.731 | 148.5  |
| 21    | 1080.0    | 2.701 | 3.7    |

NMR 400

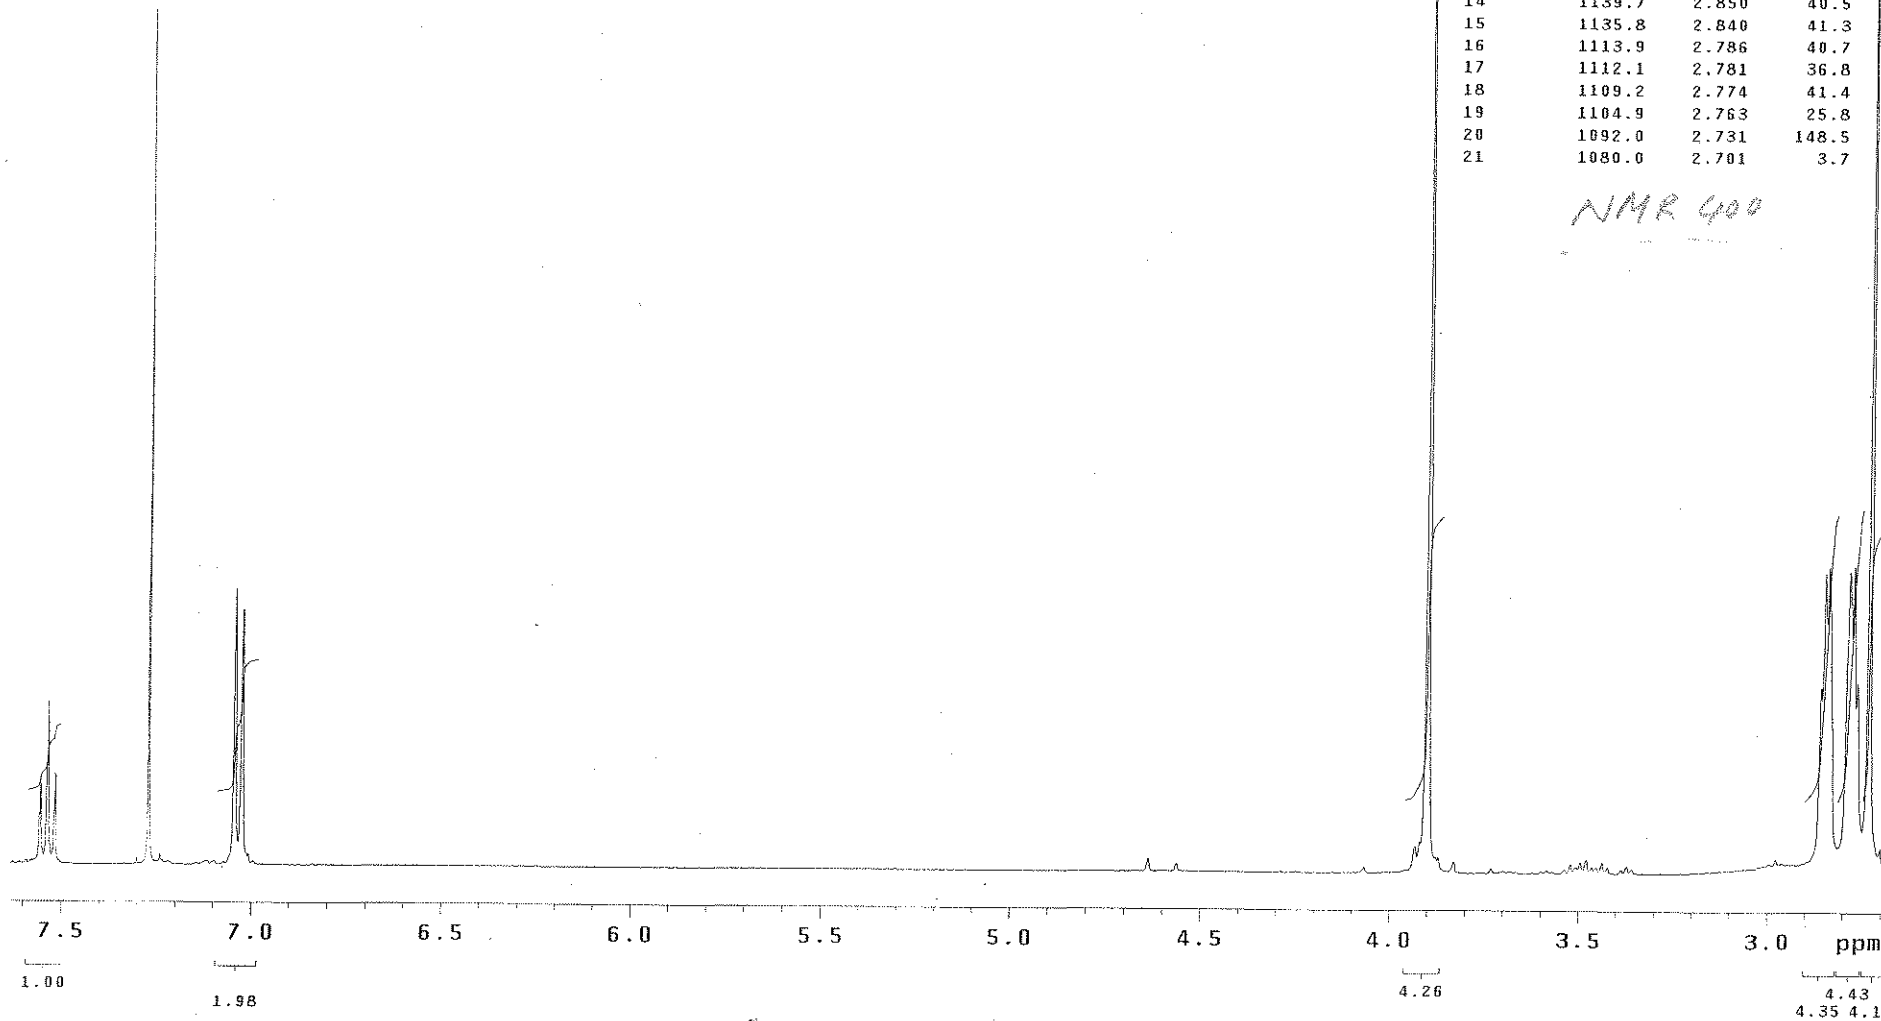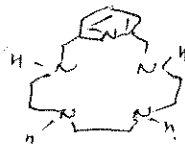



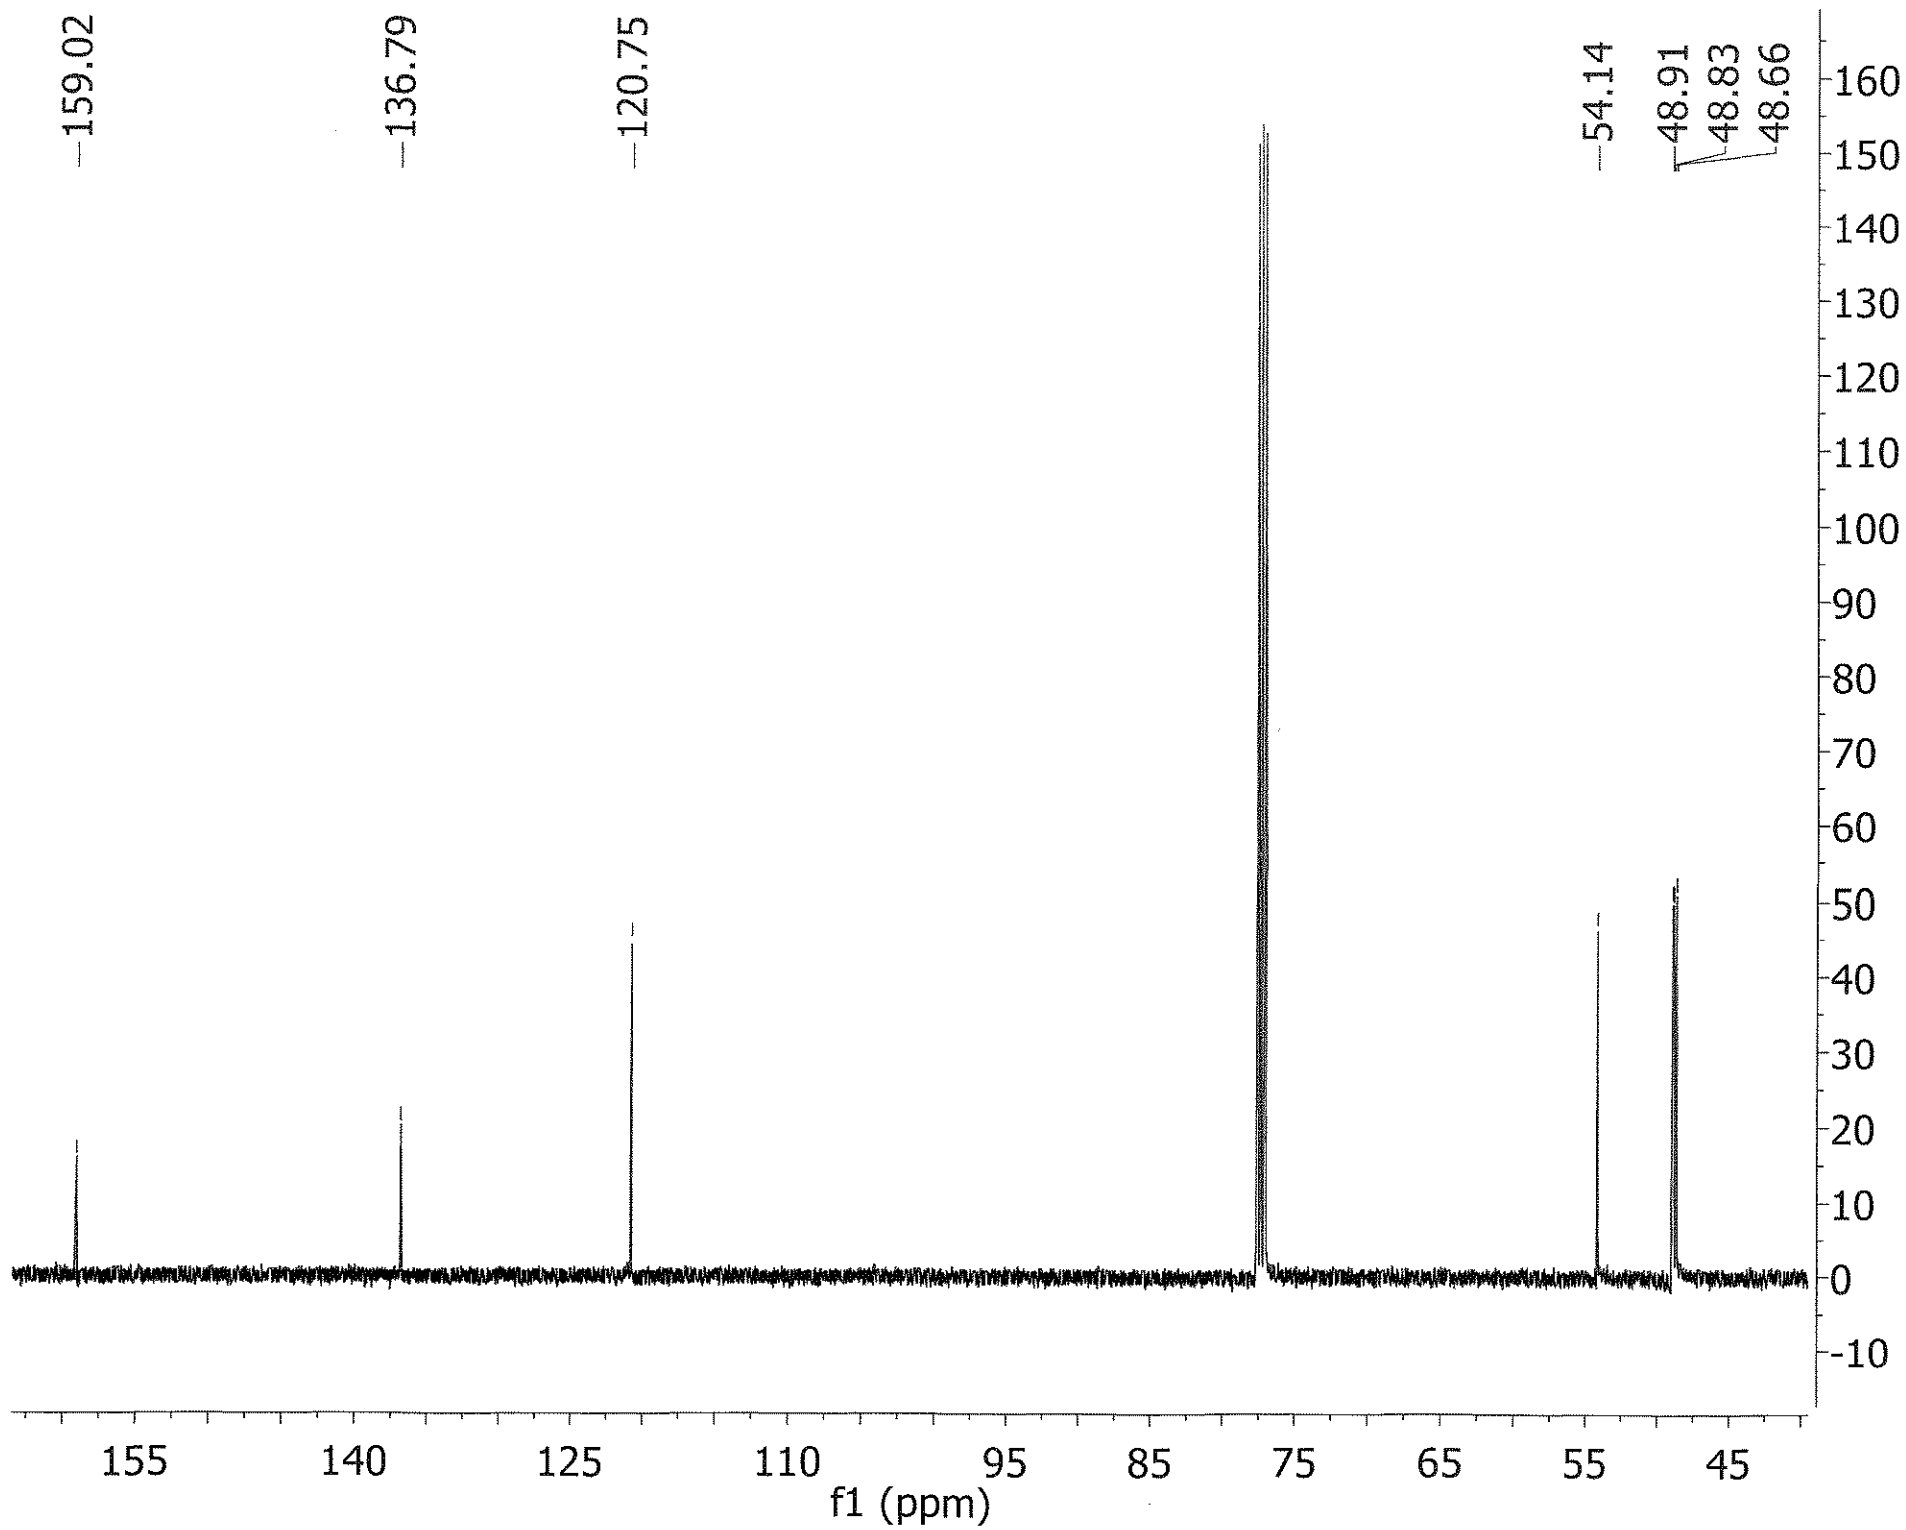

3,6,9,12,18-Pentaazabicyclo[12,3,1]octadeca-  
1(18),14,16-triene dichlorozinc (II)

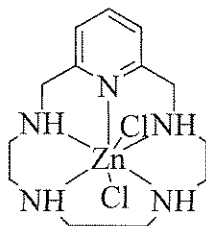

**SH20**

$C_{13}H_{23}Cl_2N_5Zn$

Exact Mass: 383.06

Mol. Wt.: 385.65

m/e: 385.06 (100.0%), 383.06 (82.3%),  
387.06 (71.7%), 389.05 (25.2%), 386.06  
(22.8%), 388.06 (14.5%), 384.07 (11.8%),  
390.06 (3.8%), 391.05 (3.3%), 389.06  
(2.5%), 384.06 (1.5%), 388.05 (1.3%),  
390.05 (1.2%), 391.06 (1.1%)

C, 40.49; H, 6.01; Cl, 18.39; N, 18.16; Zn,  
16.96

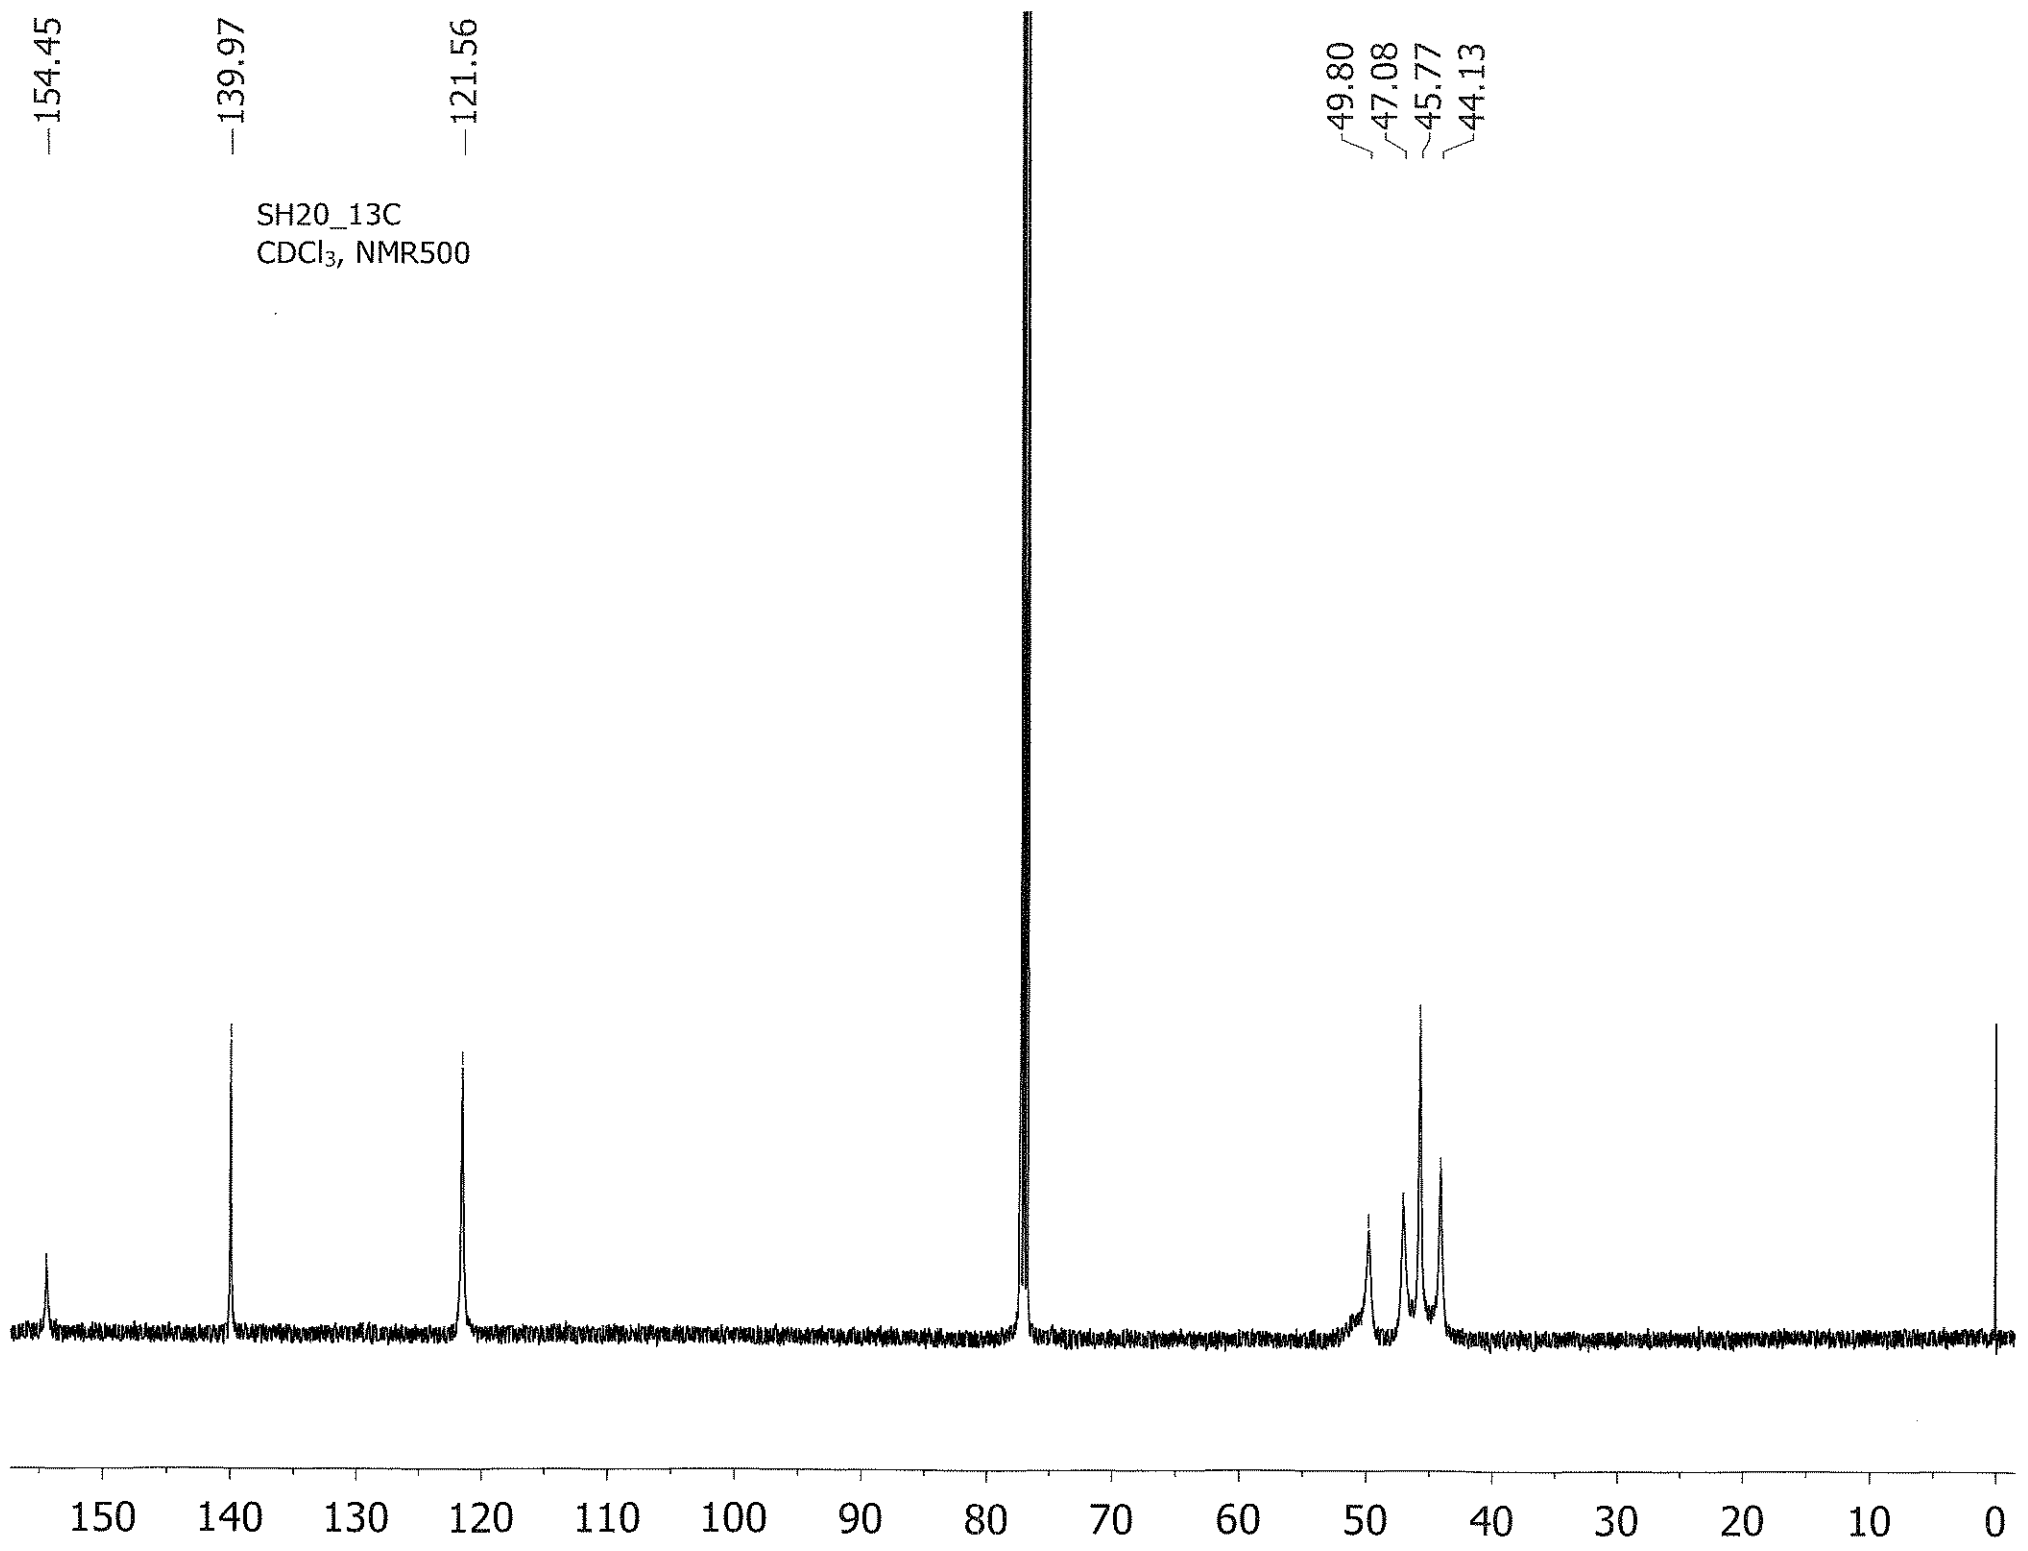

S420

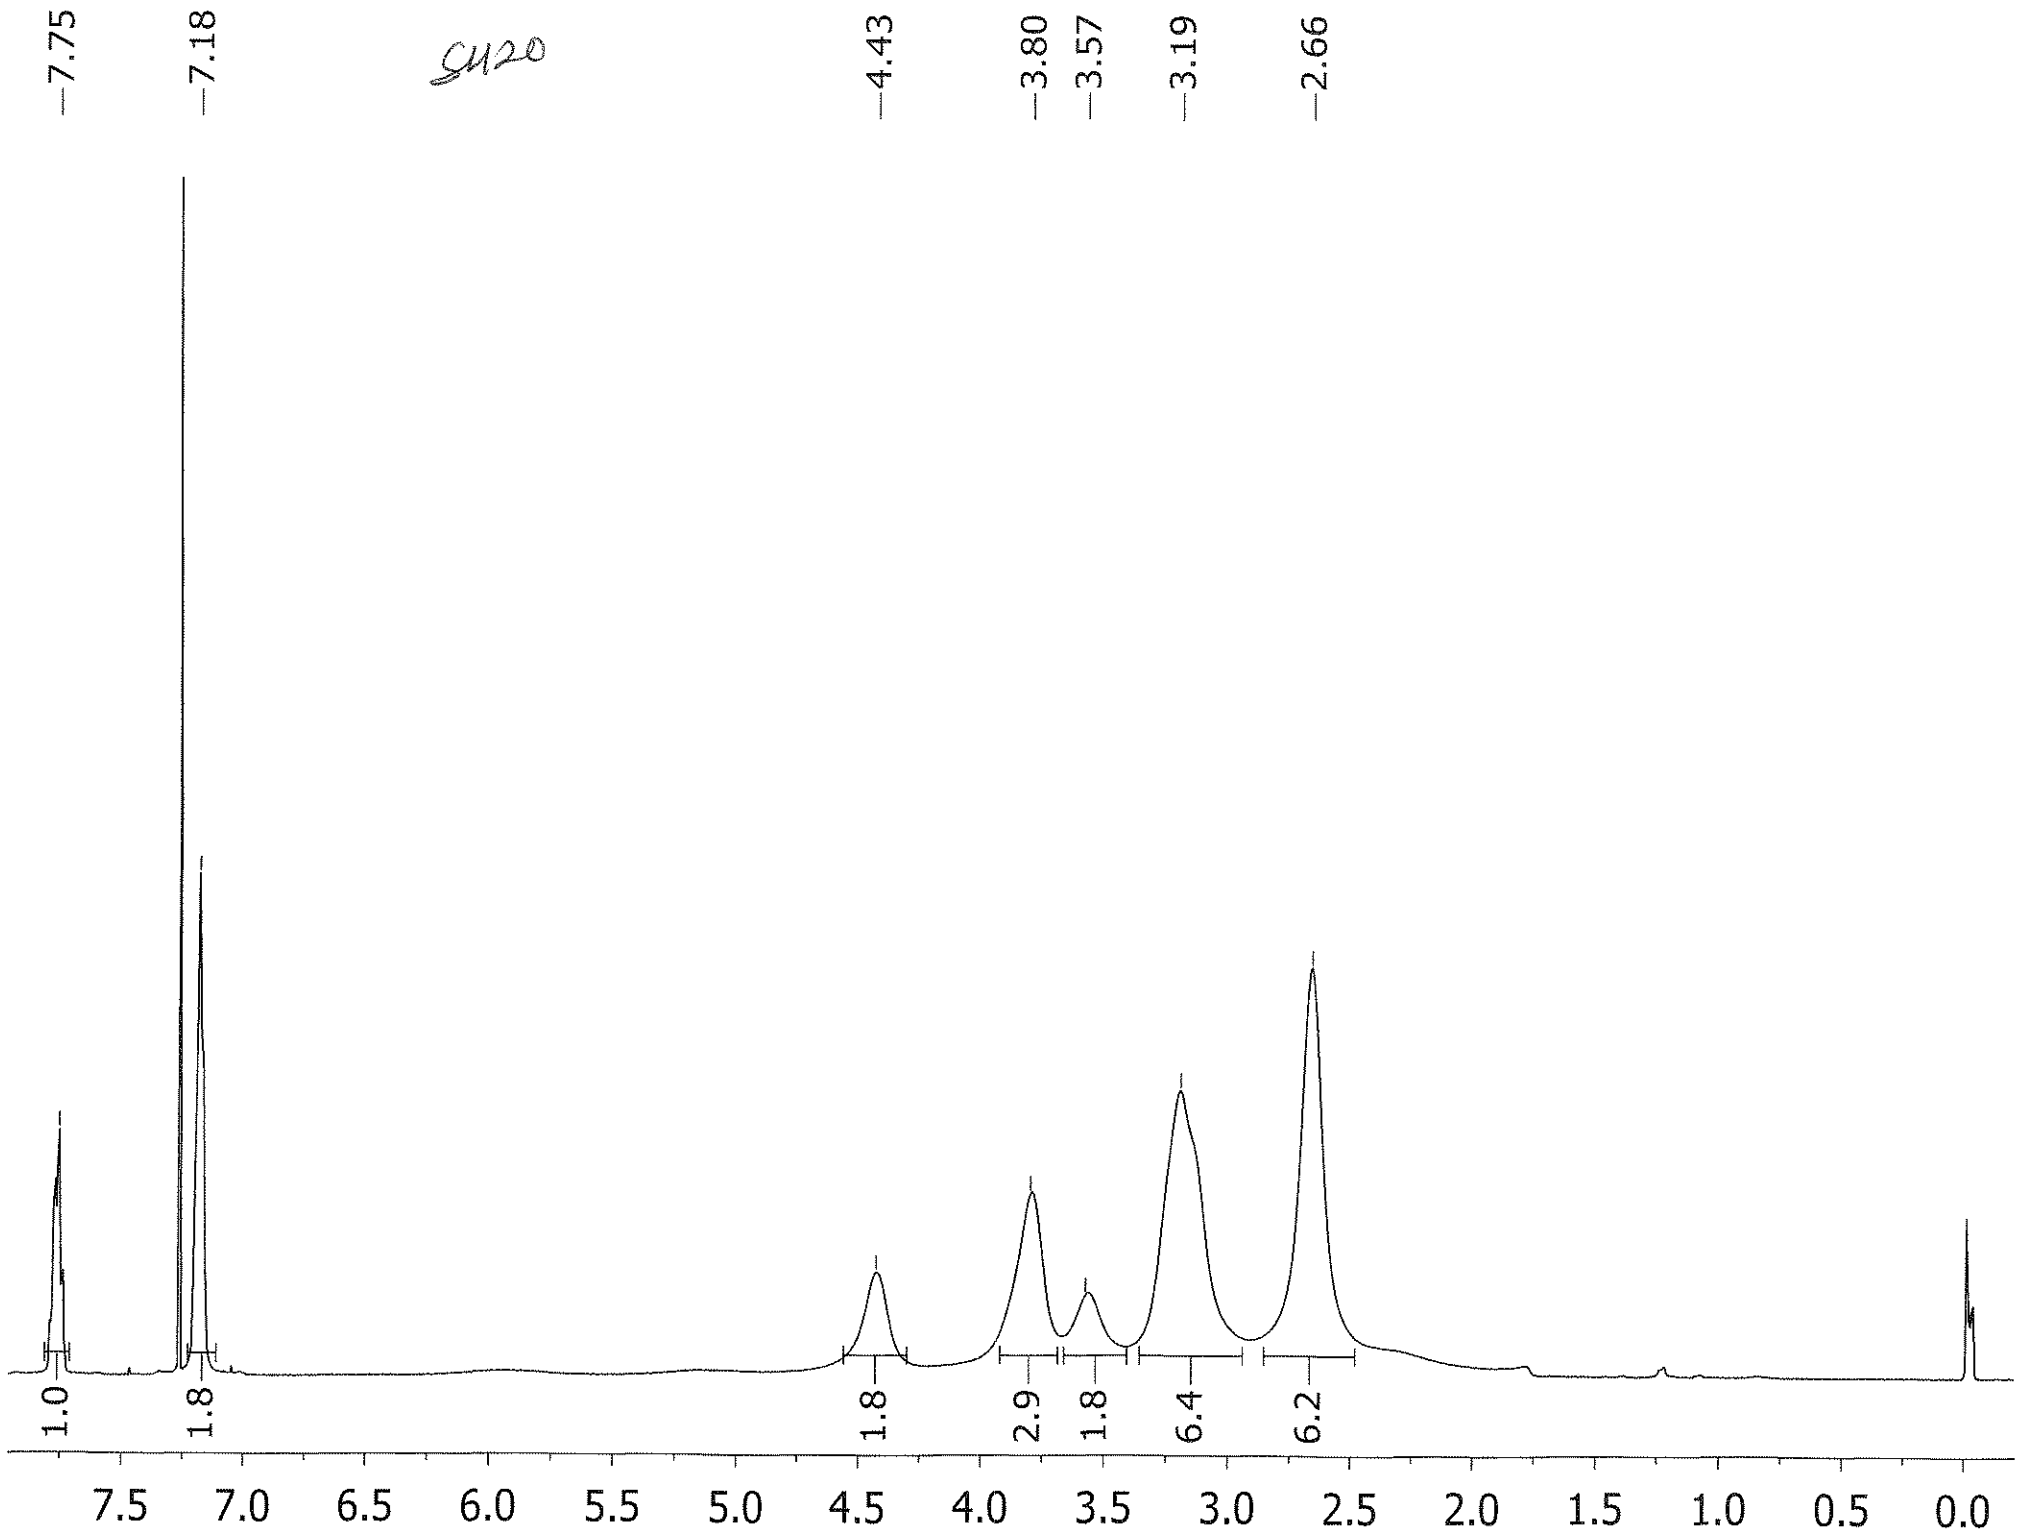

3,4,5,6,7,8,9,10,11,12,13,13a,14,15,16-  
Pentadecahydro-2,17-etheno-1,4,7,10,13-  
benzopentaazacyclopentadecine

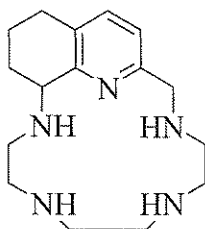

**SH07**

$C_{16}H_{27}N_5$

Exact Mass: 289.23

Mol. Wt.: 289.42

m/e: 289.23 (100.0%), 290.23  
(17.6%), 290.22 (1.8%), 291.23 (1.7%)

C, 66.40; H, 9.40; N, 24.20

110105\_E244\_Ether\_SH07\_1H-64Scan  
CDCl<sub>3</sub>, NMR500

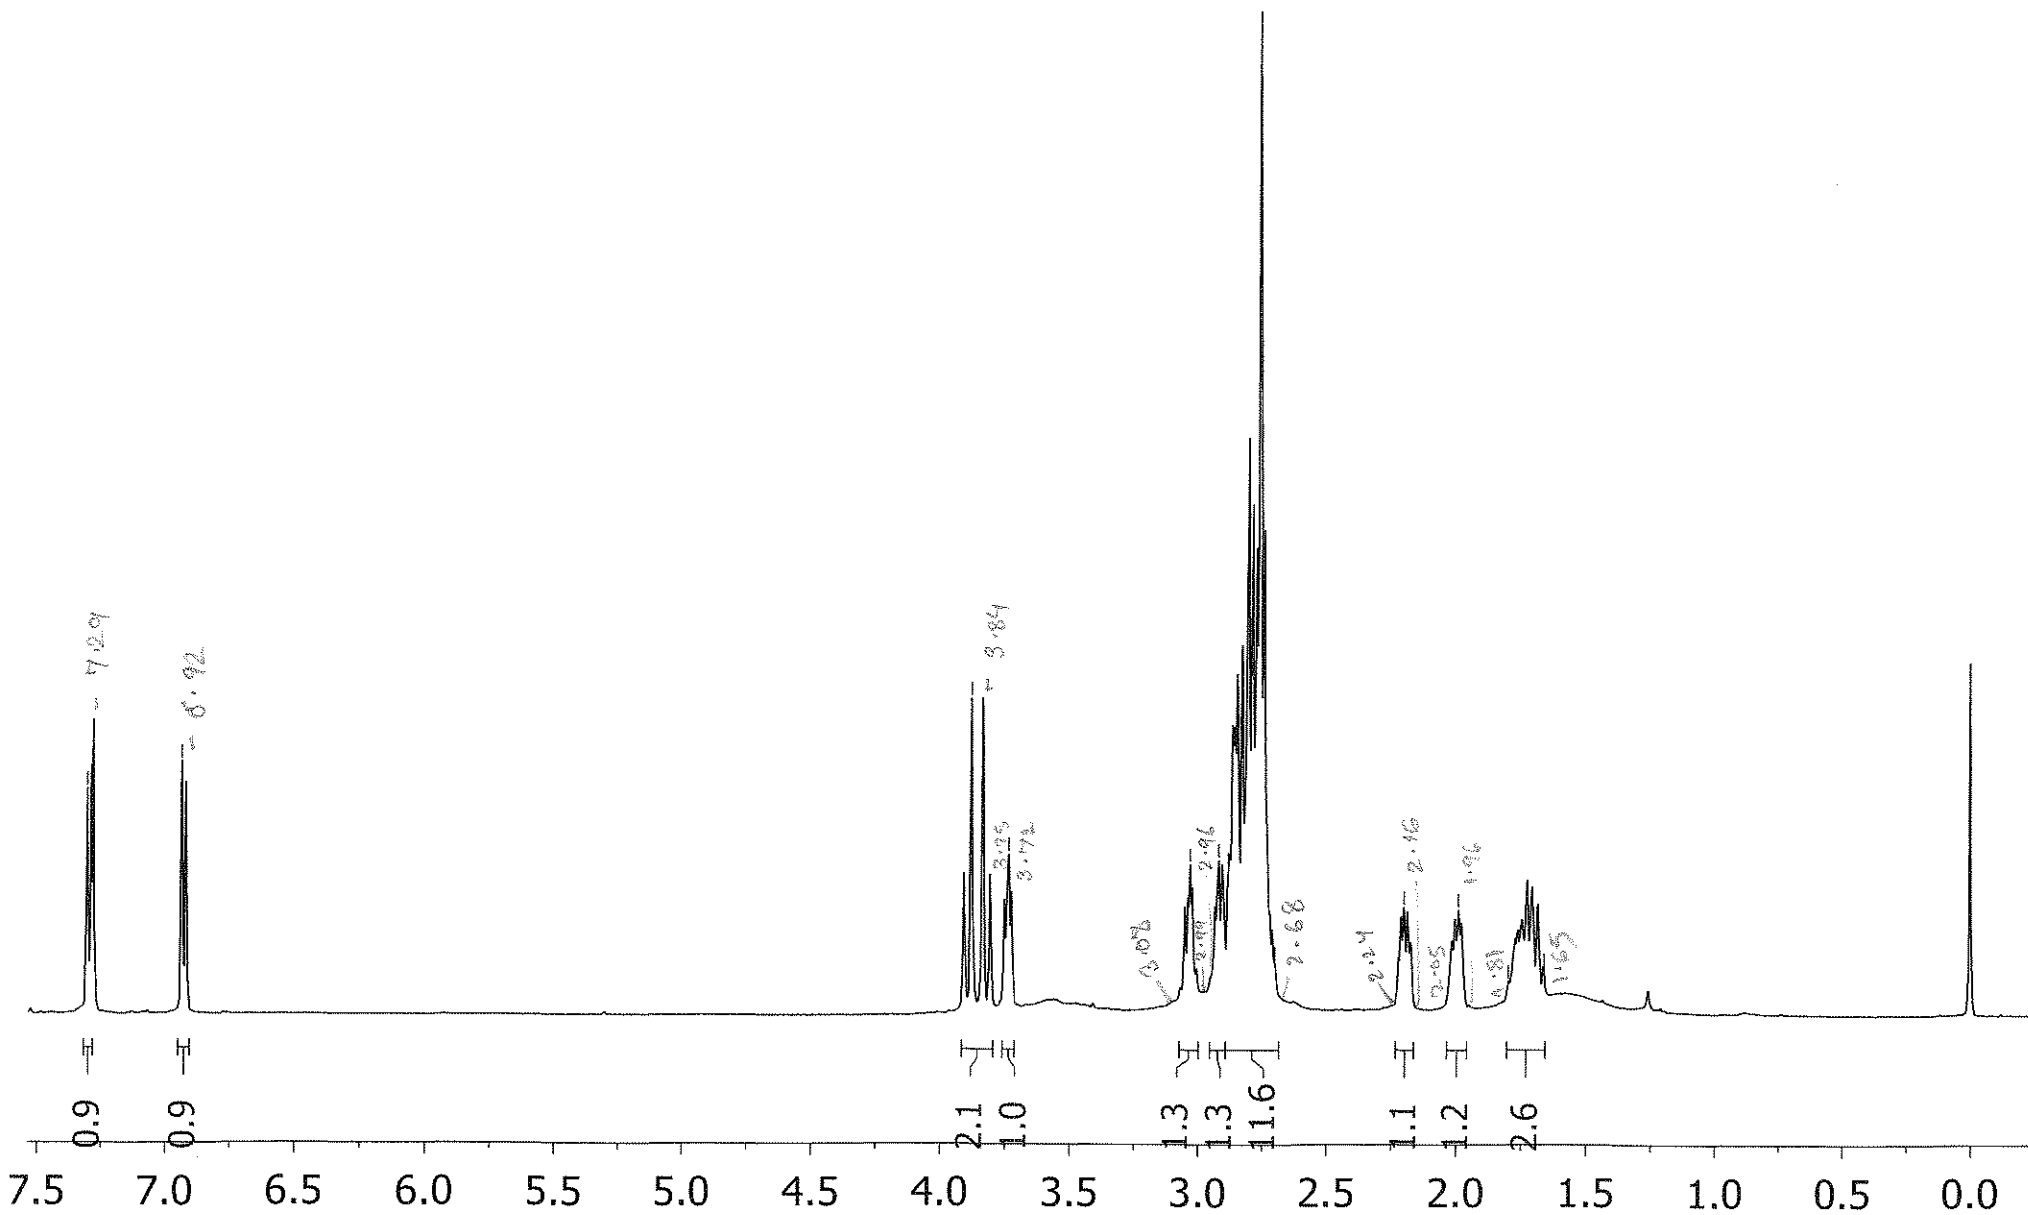

156.74  
155.91

137.10

130.24

120.23

57.85

53.34

48.52

48.46

48.16

46.64

29.26

28.55

20.18

110105\_E244\_Ether\_SH07\_13C-6000Scan  
CDCl<sub>3</sub>, NMR500

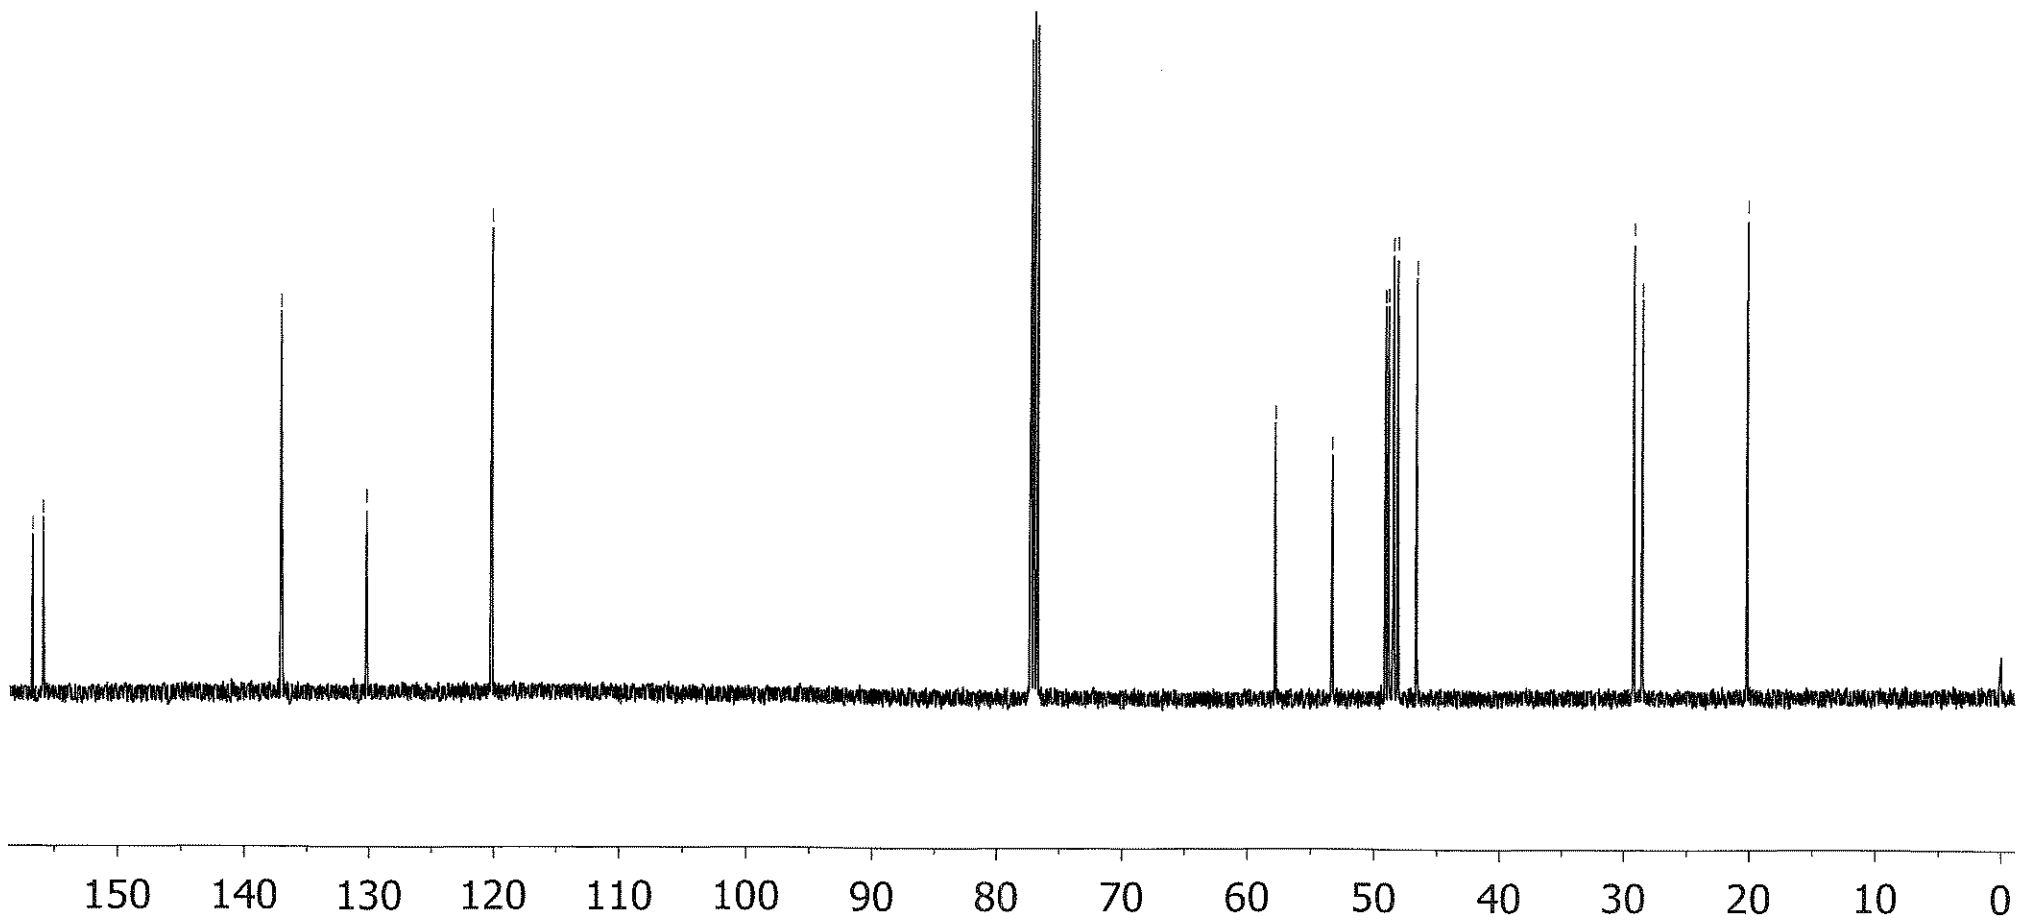

110105\_E244\_Ether\_SH07\_13C-6000Scan  
CDCl<sub>3</sub>, NMR500

49.13

48.90

48.52

48.46

48.16

46.64

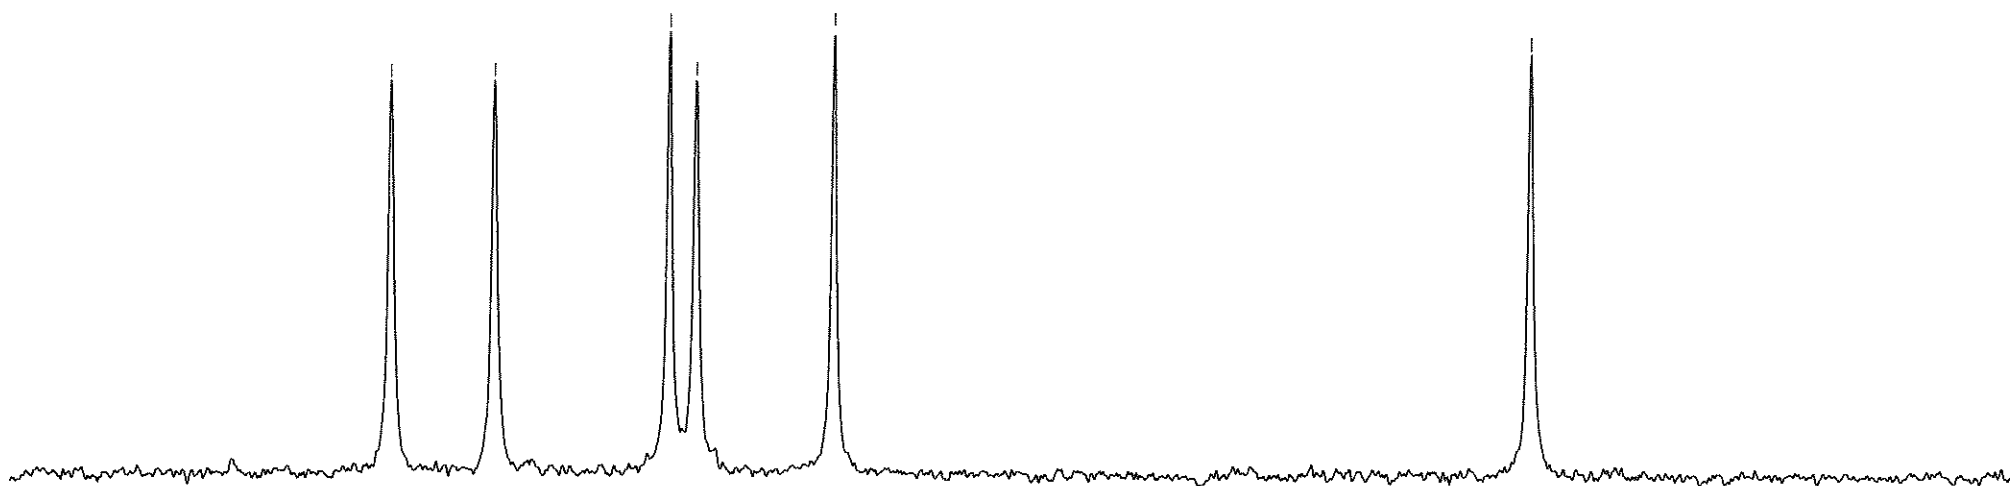

49.8 49.4 49.0 48.6 48.2 47.8 47.4 47.0 46.6 46.2 45.8



3,4,5,6,7,8,9,10,11,12,13,13a,14,15,16-  
Pentadecahydro-2,17-etheno-1,4,7,10,13-  
benzopentaazacyclopentadecine  
dichlorozinc (II)

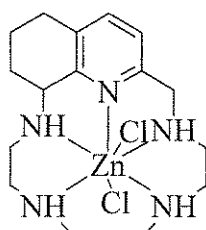

**SH36**

$C_{16}H_{27}Cl_2N_5Zn$

Exact Mass: 423.09

Mol. Wt.: 425.72

m/e: 425.09 (100.0%), 423.09 (82.2%), 427.09  
(71.9%), 426.09 (26.0%), 429.09 (22.9%),  
428.09 (17.3%), 424.10 (14.5%), 430.09 (5.4%),  
429.08 (4.8%), 431.08 (3.3%), 424.09 (1.5%),  
427.10 (1.5%), 431.09 (1.2%), 425.10 (1.2%)  
C, 45.14; H, 6.39; Cl, 16.66; N, 16.45; Zn, 15.36

SH36\_1H  
CDCl<sub>3</sub>, NMR500

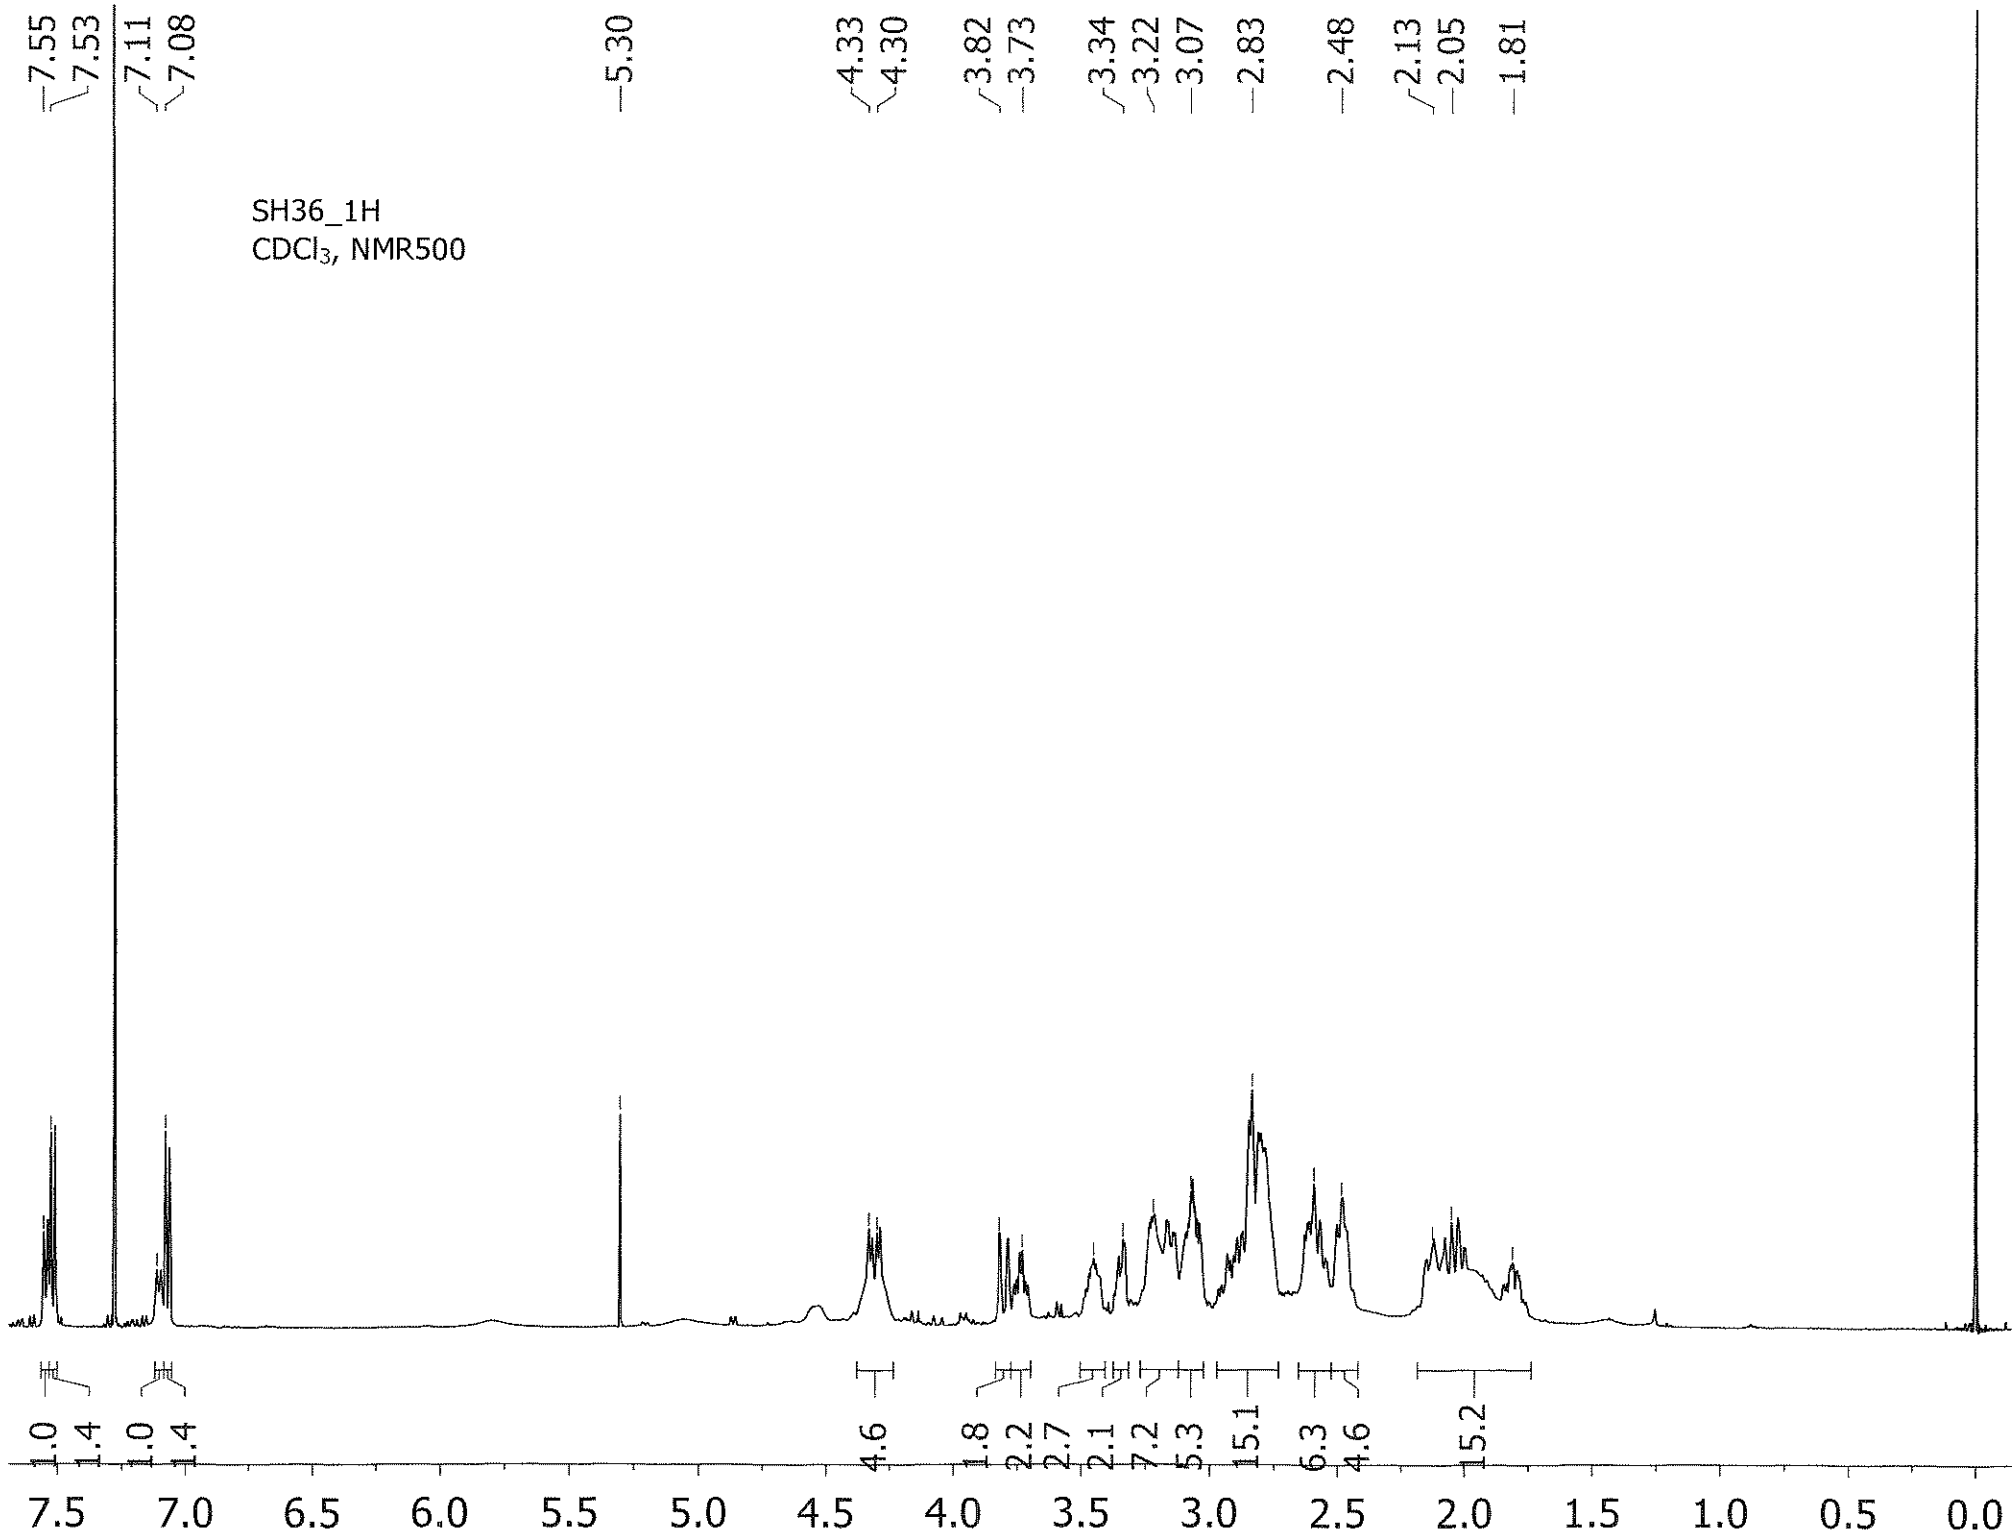

SH36\_13C  
CDCl<sub>3</sub>, NMR500

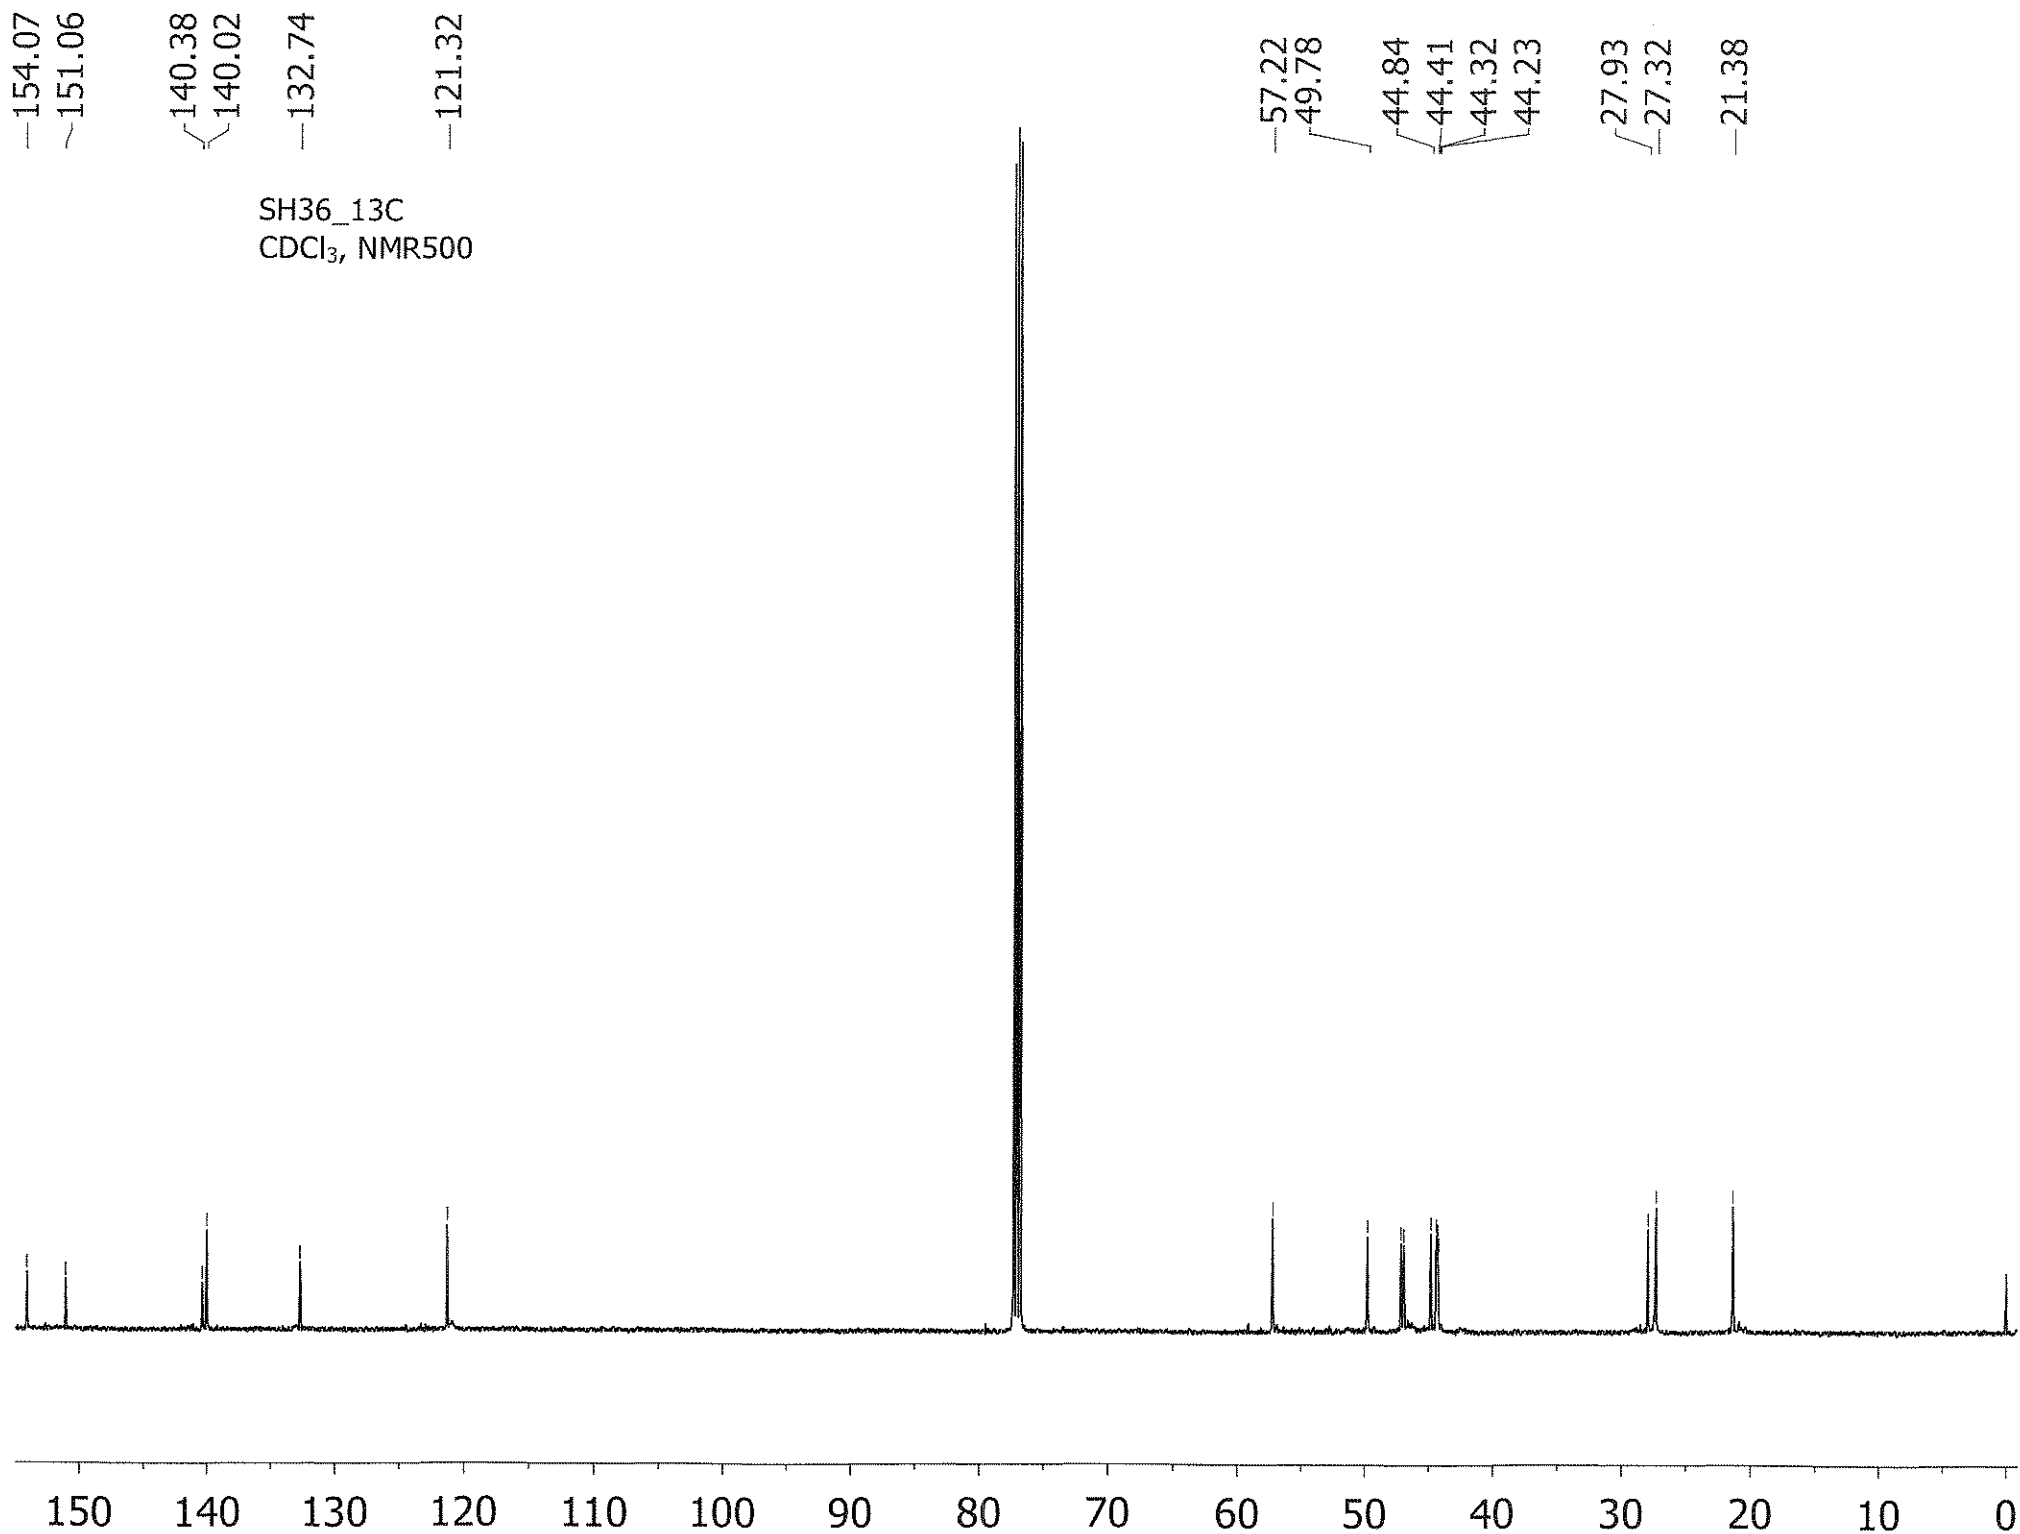

2,3,4,4a,5,6,7,8,9,10,11,12,13,14,14a,15,16,  
17-Octadecahydro-1,18-methenodibenzo  
[b,e][1,4,7,10,13]pentaazacyclopentadecine

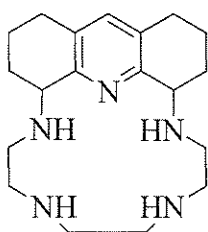

**SH09**

$C_{19}H_{31}N_5$

Exact Mass: 329.26

Mol. Wt.: 329.48

m/e: 329.26 (100.0%), 330.26  
(20.9%), 331.26 (2.4%), 330.25 (1.8%)

C, 69.26; H, 9.48; N, 21.26

SH09<sup>10</sup> fraction 5-6 E247 ~~then~~ E260

Sample: 110308\_E260\_SH09\_CDC13\_1M.  
 Sample ID: s\_20110308\_06  
 File: s\_20110308\_06/data/cdc13\_01.fid

Pulse Sequence: s2pu1  
 Solvent: cdcl3  
 Temp. 25.0 C / 298.1 K  
 Operator: waikup  
 File: cdcl3\_01  
 VNMRS-500 "nmr500.localdomain"

Relax. delay 1.000 sec  
 Pulse 45.0 degrees  
 Acq. time 2.049 sec  
 Width 5296.6 Hz  
 8 repetitions  
 OBSERVE H1, 499.7811204 MHz  
 DATA PROCESSING  
 Resol. enhancement -0.0 Hz  
 FT size 65536  
 Total time 0 min, 30 sec

| INDEX | FREQUENCY | PPM   | HEIGHT | INDEX | FREQUENCY | PPM    | HEIGHT |
|-------|-----------|-------|--------|-------|-----------|--------|--------|
| 1     | 3641.1    | 7.285 | 37.0   | 40    | 978.6     | 1.958  | 23.0   |
| 2     | 3640.6    | 7.284 | 45.9   | 41    | 975.5     | 1.952  | 30.1   |
| 3     | 3520.0    | 7.043 | 91.4   | 42    | 972.3     | 1.945  | 30.4   |
| 4     | 1855.9    | 3.714 | 19.5   | 43    | 969.2     | 1.939  | 27.6   |
| 5     | 1830.2    | 3.662 | 42.7   | 44    | 878.8     | 1.758  | 22.9   |
| 6     | 1824.9    | 3.651 | 44.8   | 45    | 877.2     | 1.755  | 19.7   |
| 7     | 1820.9    | 3.643 | 45.2   | 46    | 875.8     | 1.752  | 21.1   |
| 8     | 1815.4    | 3.632 | 41.7   | 47    | 873.7     | 1.748  | 25.6   |
| 9     | 1541.2    | 3.084 | 23.6   | 48    | 871.1     | 1.743  | 22.4   |
| 10    | 1539.3    | 3.080 | 27.5   | 49    | 869.8     | 1.740  | 23.8   |
| 11    | 1533.5    | 3.068 | 38.5   | 50    | 866.7     | 1.734  | 26.5   |
| 12    | 1529.8    | 3.061 | 30.0   | 51    | 863.8     | 1.728  | 26.3   |
| 13    | 1527.8    | 3.057 | 29.3   | 52    | 860.7     | 1.722  | 27.4   |
| 14    | 1523.9    | 3.049 | 53.7   | 53    | 817.6     | 1.636  | 29.5   |
| 15    | 1503.7    | 3.009 | 28.9   | 54    | 814.8     | 1.630  | 31.0   |
| 16    | 1495.5    | 2.992 | 30.0   | 55    | 808.0     | 1.617  | 34.1   |
| 17    | 1489.8    | 2.981 | 24.6   | 56    | 805.3     | 1.611  | 70.0   |
| 18    | 1439.4    | 2.880 | 47.8   | 57    | 802.5     | 1.606  | 46.2   |
| 19    | 1431.0    | 2.863 | 59.9   | 58    | 795.8     | 1.592  | 49.6   |
| 20    | 1382.7    | 2.767 | 27.0   | 59    | 792.8     | 1.586  | 65.4   |
| 21    | 1371.4    | 2.744 | 60.5   | 60    | 790.3     | 1.581  | 31.7   |
| 22    | 1364.4    | 2.730 | 151.2  | 61    | 783.3     | 1.567  | 28.5   |
| 23    | 1356.0    | 2.713 | 109.4  | 62    | 780.6     | 1.562  | 24.9   |
| 24    | 1353.1    | 2.707 | 129.3  | 63    | -0.0      | -0.000 | 68.7   |
| 25    | 1348.2    | 2.698 | 50.7   |       |           |        |        |
| 26    | 1343.9    | 2.689 | 24.0   |       |           |        |        |
| 27    | 1341.6    | 2.684 | 28.8   |       |           |        |        |
| 28    | 1121.0    | 2.243 | 16.7   |       |           |        |        |
| 29    | 1117.7    | 2.236 | 27.1   |       |           |        |        |
| 30    | 1115.3    | 2.232 | 29.9   |       |           |        |        |
| 31    | 1111.3    | 2.224 | 27.3   |       |           |        |        |
| 32    | 1110.0    | 2.221 | 28.8   |       |           |        |        |
| 33    | 1108.8    | 2.219 | 28.1   |       |           |        |        |
| 34    | 1105.1    | 2.211 | 30.0   |       |           |        |        |
| 35    | 1102.5    | 2.206 | 31.0   |       |           |        |        |
| 36    | 1099.8    | 2.201 | 18.3   |       |           |        |        |
| 37    | 988.4     | 1.978 | 21.2   |       |           |        |        |
| 38    | 986.0     | 1.973 | 23.8   |       |           |        |        |
| 39    | 982.1     | 1.965 | 27.4   |       |           |        |        |

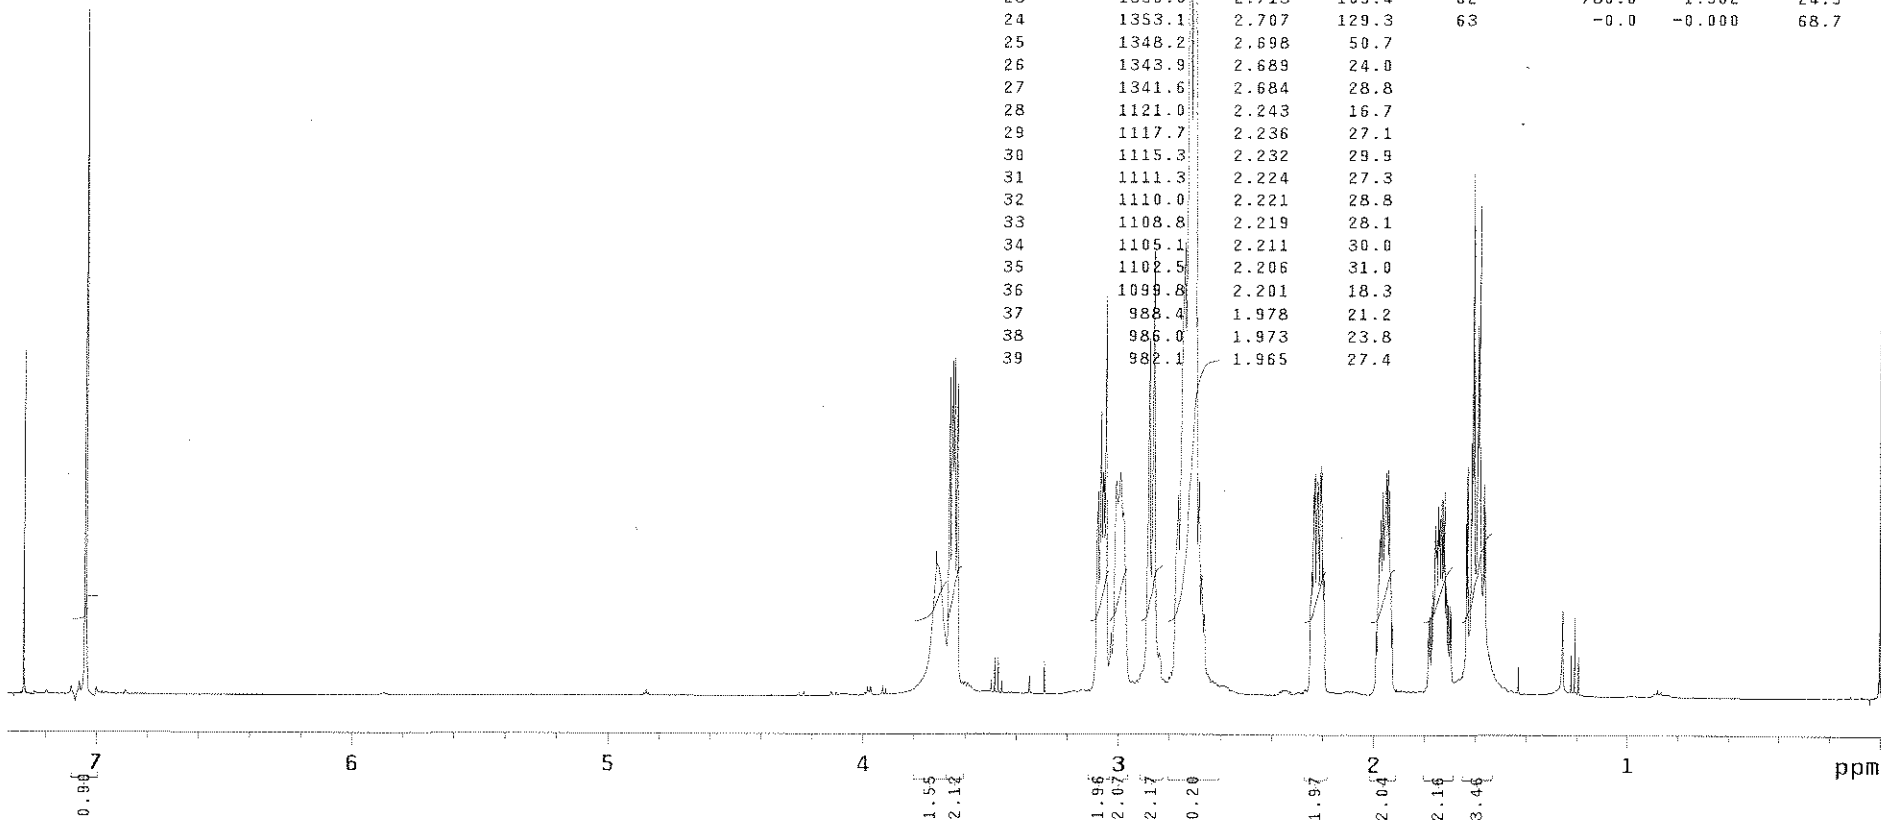

SH09 E253

Sample: SH09\_E253  
Sample ID: s\_20110309\_01  
File: s\_20110309\_01/data/cdcl3\_01.fid

Pulse Sequence: s2pul

Solvent: cdcl3  
Temp. 25.0 C / 298.1 K  
Operator: walkup  
File: cdcl3\_01  
VNMR5-400 "nmr400.localdomain"

Relax. delay 1.000 sec  
Pulse 45.0 degrees  
Acq. time 1.300 sec  
Width 24509.8 Hz  
256 repetitions  
OBSERVE C13, 100.545532 MHz  
DECOUPLE H1, 399.8646885 MHz  
Power 41 dB  
continuously on  
WALTZ-16 modulated  
DATA PROCESSING  
Line broadening 0.5 Hz  
FT size 65536  
Total time 9 min, 49 sec

| INDEX | FREQUENCY | PPM     | HEIGHT |
|-------|-----------|---------|--------|
| 1     | 15480.5   | 153.965 | 38.7   |
| 2     | 13786.4   | 137.116 | 38.4   |
| 3     | 13048.8   | 129.780 | 39.4   |
| 4     | 7774.8    | 77.327  | 93.2   |
| 5     | 7742.7    | 77.007  | 97.8   |
| 6     | 7710.5    | 76.687  | 97.2   |
| 7     | 5802.4    | 57.709  | 88.6   |
| 8     | 4931.0    | 49.043  | 76.7   |
| 9     | 4830.0    | 48.038  | 84.3   |
| 10    | 4725.3    | 46.997  | 76.2   |
| 11    | 2970.6    | 29.544  | 87.7   |
| 12    | 2850.9    | 28.354  | 87.0   |
| 13    | 2067.0    | 20.558  | 84.8   |

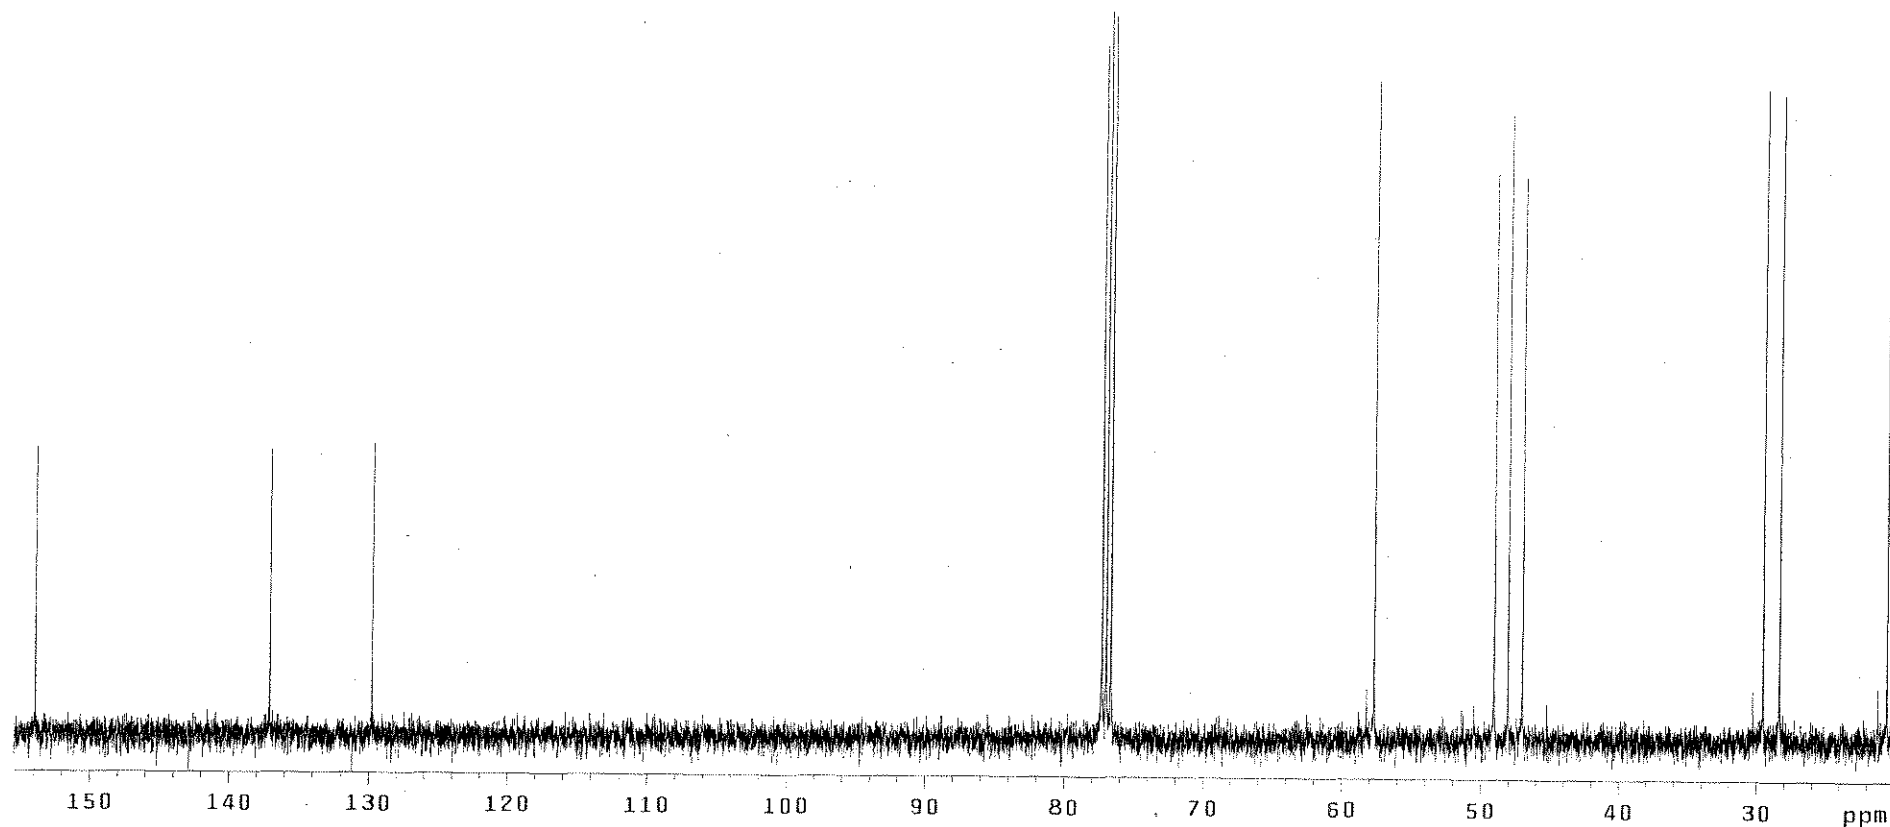

2,3,4,4a,5,6,7,8,9,10,11,12,13,14,14a,15,  
16,17-Octadecahydro-1,18-  
methenodibenzo[b,e][1,4,7,10,13]penta-  
zacyclopentadecine dichlorozinc (II)

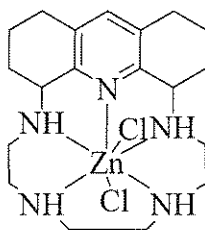

**SH39**

$C_{19}H_{31}Cl_2N_5Zn$

Exact Mass: 463.12

Mol. Wt.: 465.78

m/e: 465.12 (100.0%), 463.12 (82.4%),  
467.12 (71.0%), 469.12 (27.5%), 466.13  
(21.0%), 468.12 (20.2%), 464.13 (17.2%),  
466.12 (8.8%), 470.12 (6.2%), 467.13  
(3.5%), 471.11 (3.3%), 465.13 (2.0%),  
464.12 (1.5%), 469.13 (1.5%), 471.12 (1.4%)  
C, 48.99; H, 6.71; Cl, 15.22; N, 15.04; Zn,  
14.04

-7.30  
-7.22

-5.30

-3.95

3.30  
3.17  
-3.09

-2.78

-2.47

-2.07

-1.74

-1.48

SH39\_1H  
CDCl<sub>3</sub>, NMR500

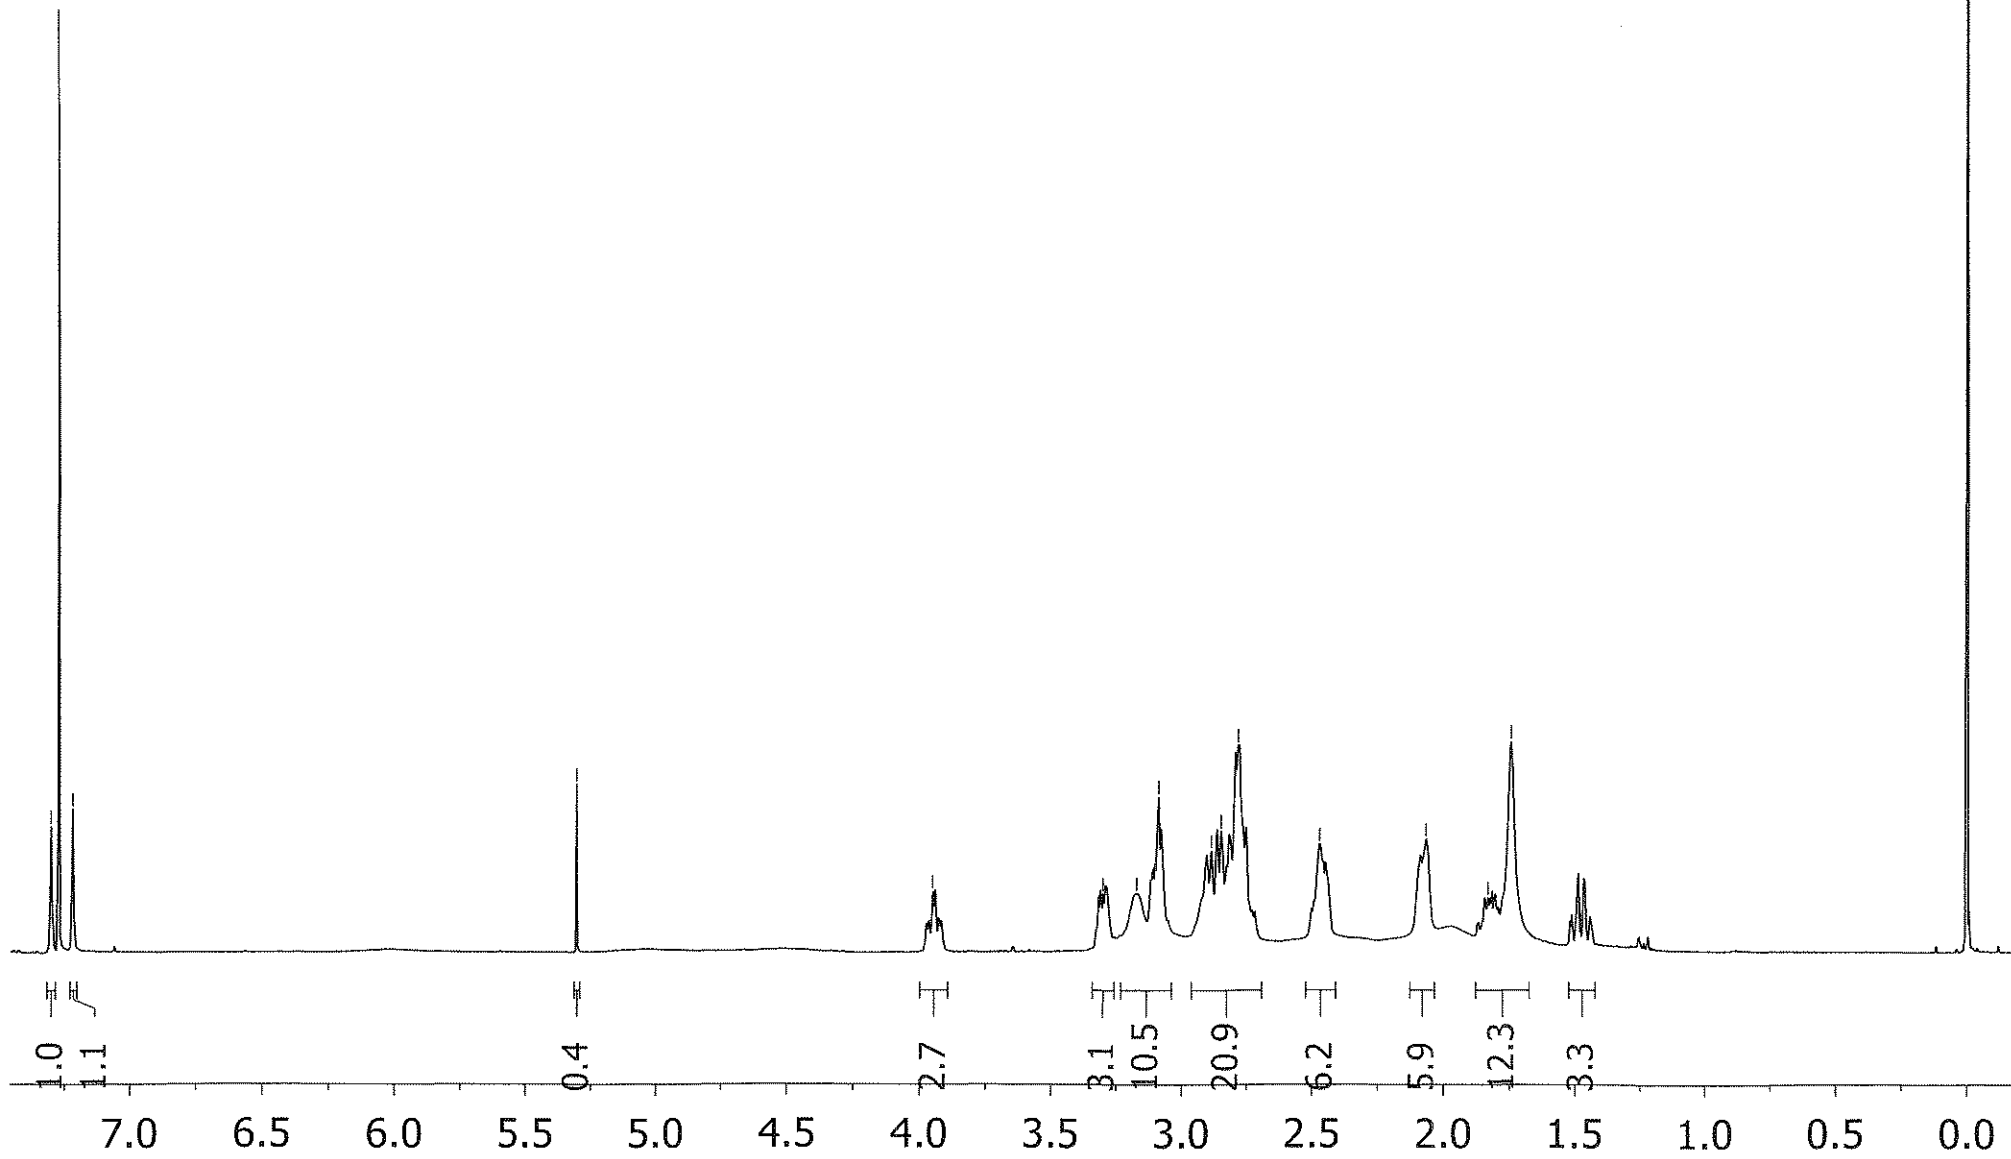



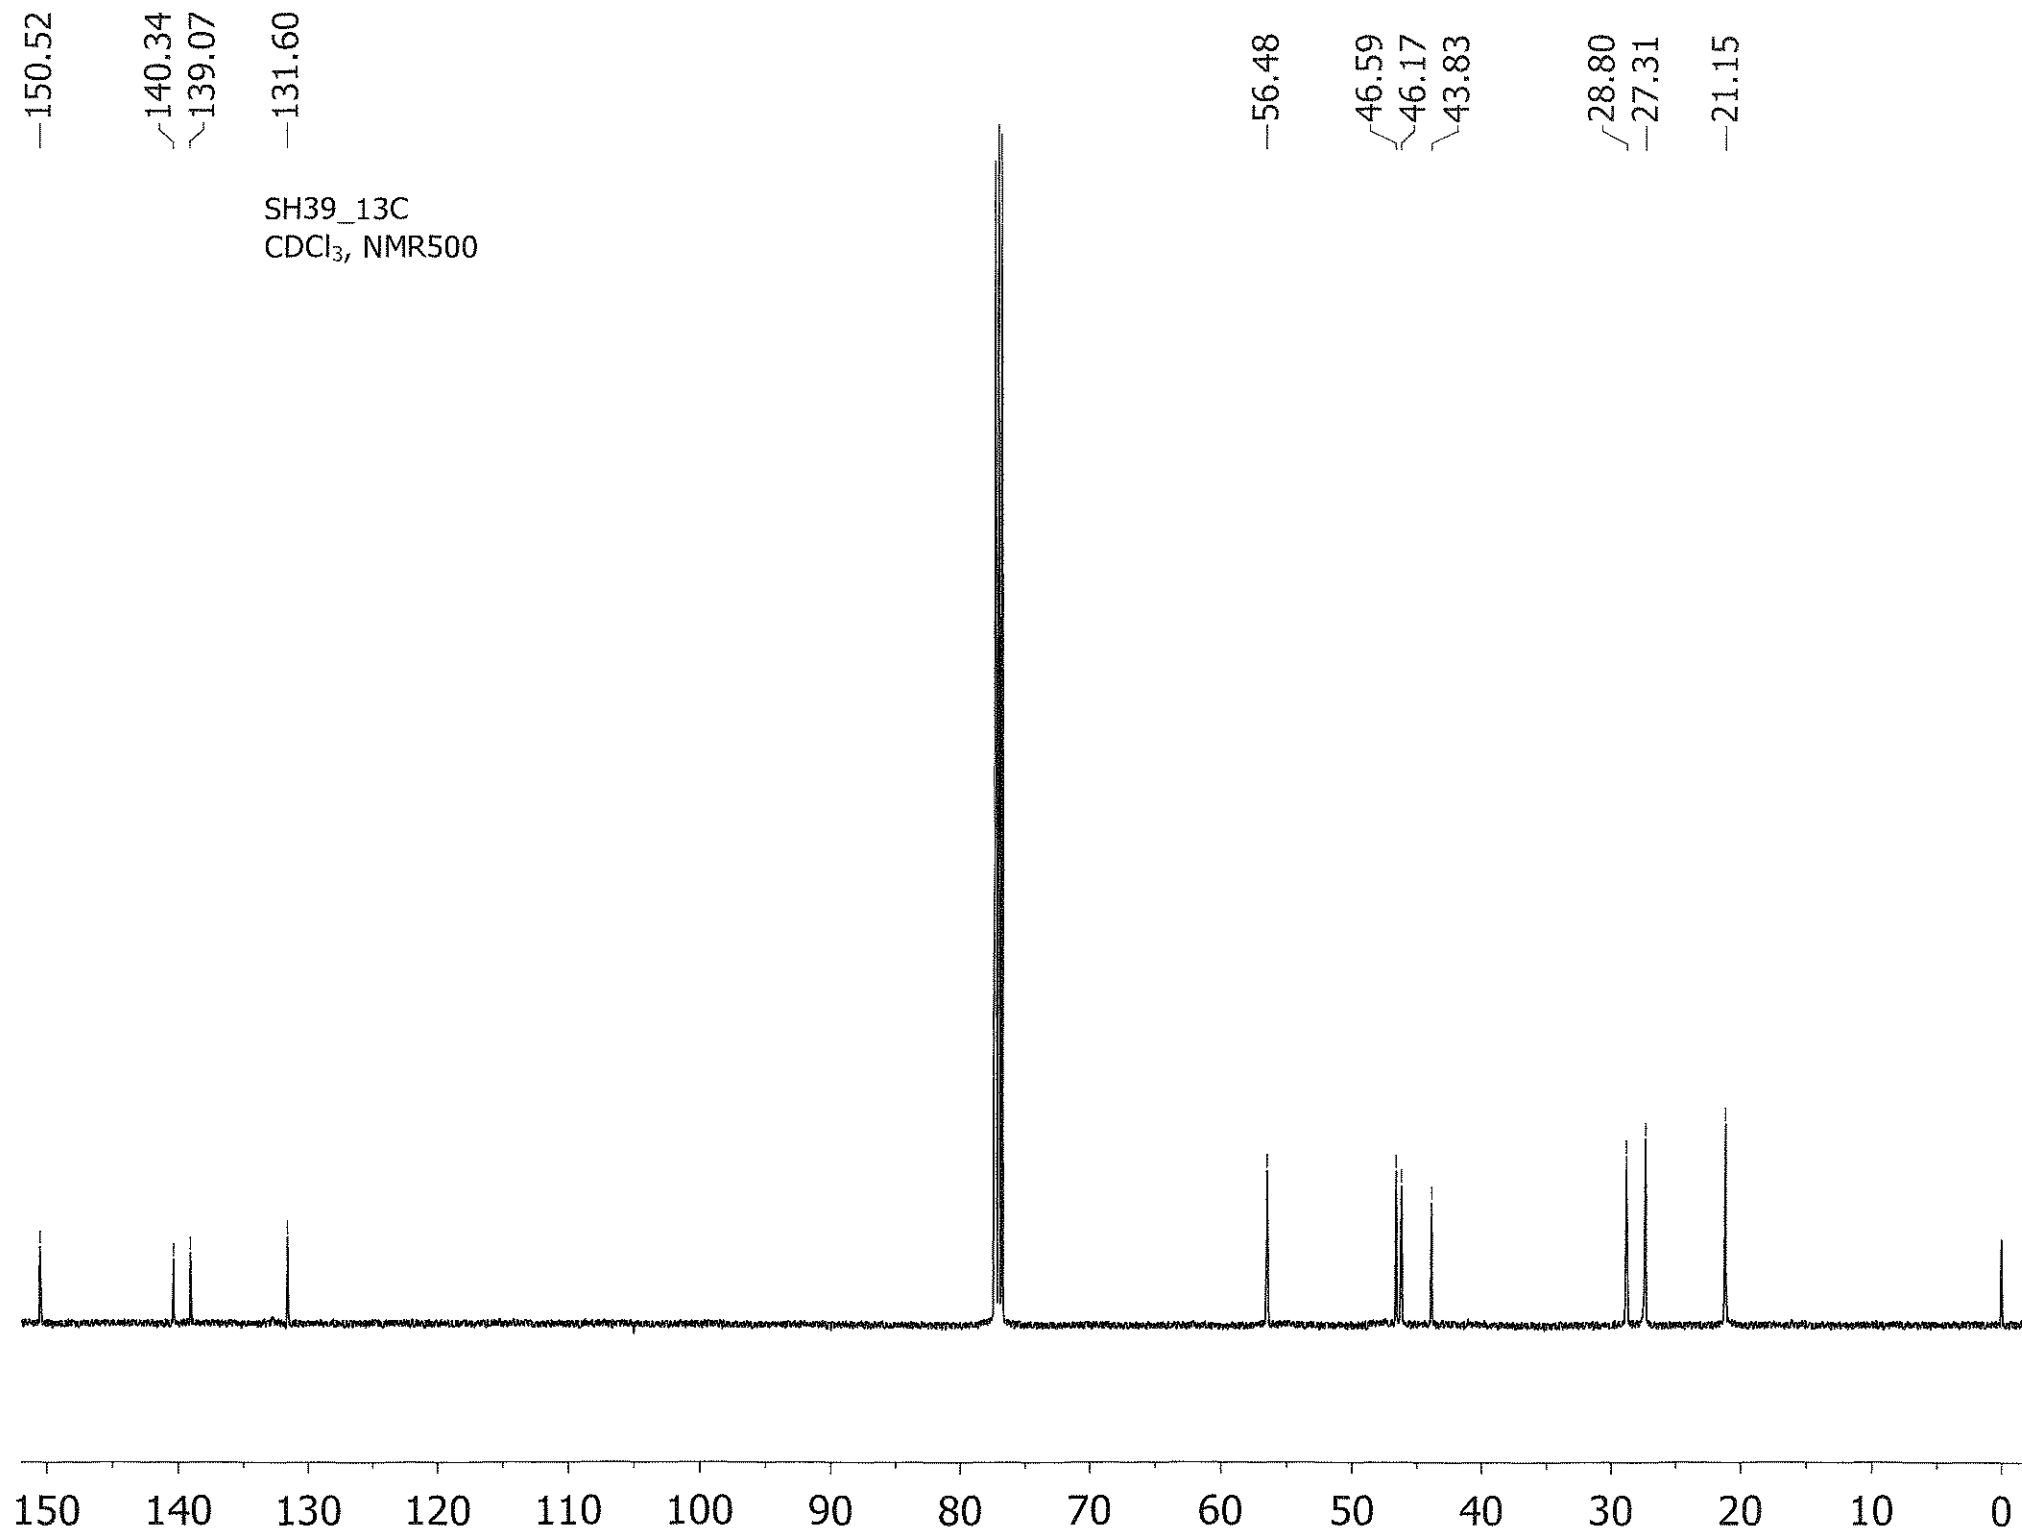

Supplement: c5ob01557j1.pdf [file c5ob01557j1.pdf]
